# Supplementary material for: m5U54 tRNA Hypomodification by lack of TRMT2A Drives the Generation of tRNA-Derived Small RNAs
Source: Preprints.org preprint supplement (doi:10.20944/preprints202101.0227.v1), 2021-01-12
Supplement: Supplementary file 1 [file File S1-STables.xlsx]

## Sheet: Table S1_tRFs upregulated
tRFs ID	tRFs seq	tRF type	tRFdb ID	MINTbase ID	Length	Fold Change	P-value
tRF-SeC-TCA-001	GCCCGGATGATCCTCAGTGGTCTGGGGTGCAGGCTT	5´tiRNA	-	-	36	11.2927	0.00110618
tRF-Gly-CCC-004	GCATTGGTGGTTCAATGGTAGAATTCTCGCC	5´tiRNA	-	-	31	10.2611	8.28963e-05
tRF-His-GTG-002	TGAATCTGACAACAGAGGCTTACGACCCCTTATTTACCA	3´tiRNA	-	-	39	8.122	0.00715458
tRF-His-GTG-033	GGTGGTTCTAACTTGCTGGGGTGGCGGTTTTT	tRF-1	-	-	32	7.75859	0.000450383
tRF-iMet-CAT-003	AGCAGAGTGGCGCAGCGGAAGCGTGCTGGGCC	5´tiRNA	-	tRF-32-FP18LPMBQ4NKJ	32	7.25169	0.00158588
tRF-Gly-GCC-010	GCATGGGTGGTTCAGTGGTAGAATTCTCGCC	5´tiRNA	5003c	tRF-31-P4R8YP9LON4VD	31	7.15462	3.89676e-05
tRF-His-GTG-034	GGTGGTTCTAACTTGCTGGGGTGGCGGTTTTTT	tRF-1	-	-	33	6.97161	0.00131763
tRF-Val-AAC-009	GTTTCCGTAGTGTAGTGGTCATCACGTTCGCC	5´tiRNA	-	tRF-32-79MP9P9MH57SJ	32	6.94361	8.74144e-05
tRF-Gly-CCC-013	GCATTGGTGGTTCAGTGGTAGAATTCTCGCC	5´tiRNA	5004c	tRF-31-PNR8YP9LON4VD	31	6.70929	6.69294e-05
tRF-Gly-TCC-010	GCGTTGGTGGTATAGTGGTGAGCATAGCTGCC	5´tiRNA	-	tRF-32-QNR8VP94FQFYJ	32	6.67253	0.000160254
tRF-Leu-CAG-013	GTCAGGATGGCCGAGCGGTCTAA	tRF-5b	5023b	tRF-23-SP5830MM0F	23	6.32557	0.002586
tRF-iMet-CAT-001	AGCAGAGTGGCGCAGCGGAAGCGTGCTGGGCCC	5´tiRNA	-	tRF-33-FP18LPMBQ4NKDJ	33	6.29932	0.00320976
tRF-Gly-GCC-004	GCATAGGTGGTTCAGTGGTAGAATTCTTGCC	5´tiRNA	-	-	31	6.1945	0.00169566
tRF-iMet-CAT-002	AGCAGAGTGGCGCAGCGGAAGCGTGCTGGGC	5´tiRNA	-	tRF-31-FP18LPMBQ4NKD	31	6.16027	0.00192464
tRF-Gly-GCC-012	TCGATTCCCGGCCAATGCACCA	tRF-3b	3027b	tRF-22-WE8SPOX52	22	6.11696	0.000208306
tRF-Asn-GTT-015	GCCCACCCAGGGACGCCA	tRF-3a	-	tRF-18-P6KP6HD2	18	6.04554	0.000245622
tRF-Val-CAC-045	GTTTCCGTAGTGTAGCGGTTATCACATTCGC	5´tiRNA	-	tRF-31-79MP9PMNH5ISD	31	5.82041	0.0148139
tRF-Gly-CCC-012	GCATTGGTGGTTCAGTGGTAGAATTCTCGC	tRF-5c	-	tRF-30-PNR8YP9LON4V	30	5.74	0.000237281
tRF-Val-TAC-018	GTTTCCGTGGTGTAGTGGTTATCACATTCGCC	5´tiRNA	-	-	32	5.73858	0.00484155
tRF-His-GTG-044	GGTGGTTCTAACTTGCTGGGGTGGCGGTTTT	tRF-1	-	-	31	5.5812	0.00217885
tRF-Glu-TTC-013	TCCCACATGGTCTAGCGGTTAGGATTCCTGGT	5´tiRNA	-	tRF-32-86J8WPMN1E8YN	32	5.45206	0.000734556
tRF-Gly-TCC-045	GCGTTGGTGGTATAGTGGTGAGCATAGCTGC	5´tiRNA	-	-	31	5.36513	0.00196486
tRF-Val-AAC-015	GTTTCCGTAGTGTAGTGGTTATCACGTTCGC	5´tiRNA	5027c	tRF-31-79MP9P9NH57SD	31	5.35929	0.000608157
tRF-Gly-TCC-044	GCGTTGGTGGTATAGTGGTGAGCATAGCTG	tRF-5c	5008c	tRF-30-QNR8VP94FQFY	30	5.22589	0.0032499
tRF-Gly-CCC-043	TCGATTCCCGGGCGGCGCACCA	tRF-3b	-	tRF-22-WE8S68L52	22	5.17125	0.000766711
tRF-Leu-CAG-001	GTCAGGATGGCCGAGCGGTCTAAGGCGCTGCGTTC	5´tiRNA	-	tRF-35-SP5830MMUKLYM9	35	5.11311	0.00489735
tRF-Gly-GCC-009	GCATGGGTGGTTCAGTGGTAGAATTCTCGC	tRF-5c	-	tRF-30-P4R8YP9LON4V	30	5.09971	0.000540983
tRF-Pro-CGG-001	GGCTCGTTGGTCTAGGGGTATGATTCTCGCTTC	5´tiRNA	-	tRF-33-6978WPRLXN4V05	33	5.08292	0.0118738
tRF-Lys-CTT-009	GCCCGGCTAGCTCAGTCGGTAGAGCATGGG	tRF-5c	-	tRF-30-PSQP4PW3FJIK	30	4.97295	0.0404838
tRF-Val-AAC-016	GTTTCCGTAGTGTAGTGGTTATCACGTTCGCC	5´tiRNA	-	tRF-32-79MP9P9NH57SJ	32	4.95664	0.000576246
tRF-Gly-GCC-011	GCATGGGTGGTTCAGTGGTAGAATTCTCGCCT	5´tiRNA	-	tRF-32-P4R8YP9LON4V3	32	4.95636	0.00064823
tRF-Gly-CCC-005	GCATTGGTGGTTCAATGGTAGAATTCTCGCCT	5´tiRNA	-	tRF-32-PNR8YO9LON4V3	32	4.9368	0.00356258
tRF-Leu-TAA-054	AGCGTTGGTGTGTACTTTGACGTTT	tRF-1	-	-	25	4.84231	0.00117732
tRF-Gly-TCC-033	CGATTCCCGGCCAACGCACCA	tRF-3a	-	tRF-21-LNK8KDP1B	21	4.69924	0.00206901
tRF-Ser-AGA-018	TCGAATCCTGCCGACTACGCCA	tRF-3b	3014b	tRF-22-WB8Y3DUV2	22	4.61053	0.0101149
tRF-Val-CAC-014	GTTTCCGTAGTGTAGCGGTTATCACATTCGCC	5´tiRNA	-	tRF-32-79MP9PMNH5ISJ	32	4.57249	0.00174699
tRF-Gln-CTG-061	TTGTGTTTCATTGGCATGGTAAGGCCGTGTTTT	tRF-1	-	-	33	4.36108	0.0178015
tRF-His-GTG-003	TGAATCTGACAACAGAGGCTTACGACCCCTTATTTACCCA	3'tiRNA	-	-	40	4.29912	0.0048926
tRF-Gly-GCC-037	TCGATTCCCGGCCCATGCACCA	tRF-3b	3028b	tRF-22-WE8SP6X52	22	4.20007	0.00302471
tRF-Asp-GTC-009	TCCTCGTTAGTATAGTGGTGAGTATCCCCGC	5´tiRNA	-	-	31	4.17564	0.0133345
tRF-Gly-TCC-001	GATTCCCGGCCAACGCACCA	tRF-3a	-	tRF-20-593J2H26	20	4.10442	0.00914224
tRF-Val-AAC-026	ACCAGGCGGAAACACCA	tRF-3a	-	-	17	4.08167	0.0245697
tRF-Lys-TTT-040	GTCCCTGTTCGGGCGCCA	tRF-3a	-	tRF-18-SR99RHD2	18	4.0572	0.0329465
tRF-Gly-TCC-041	GCGTTGGTGGTATAGTGGTAAGCATAGCTGCC	5´tiRNA	-	-	32	4.04239	0.00972446
tRF-Gly-CCC-014	GCATTGGTGGTTCAGTGGTAGAATTCTCGCCT	5´tiRNA	-	tRF-32-PNR8YP9LON4V3	32	4.03326	0.00281634
tRF-Val-CAC-011	GCTTCTGTAGTGTAGTGGTTATCACGTTCGCC	5´tiRNA	-	tRF-32-Q99P9P9NH57SJ	32	4.00553	0.00324762
tRF-Glu-CTC-010	TCCCTGGTGGTCTAGTGGTTAGGATTCGGCGC	5´tiRNA	-	tRF-32-87R8WP9N1EWJM	32	3.98837	0.00266083
tRF-Ala-AGC-062	TCGATCCCCAGCATCTCCACCA	tRF-3b	-	tRF-22-WEK6PM852	22	3.96318	0.00794865
tRF-Gly-CCC-019	GCGCCGCTGGTGTAGTGGTATCATGCAAGA	tRF-5c	5007c	tRF-30-Q1Q89P9L8422	30	3.95778	0.0172605
tRF-Pro-TGG-001	CAGAGAATAGTTTAAATTAGAATCTTAGCTTT	5´tiRNA	-	-	32	3.95246	0.025208
tRF-Gly-CCC-021	GCGCCGCTGGTGTAGTGGTATCATGCAAGATT	5´tiRNA	-	tRF-32-Q1Q89P9L8422Q	32	3.9156	0.00570796
tRF-Thr-AGT-019	TCGAATCCCAGCGGTGCCTCCA	tRF-3b	-	tRF-22-WB86Q3P92	22	3.91263	0.00384384
tRF-Leu-AAG-001	ATCCCACCGCTGCCACCA	tRF-3a	3001a	tRF-18-HR0VX6D2	18	3.81605	0.0040425
tRF-Lys-CTT-006	GCCCGGCTAGCTCAGTCGGTAGAGCATGAG	tRF-5c	-	tRF-30-PSQP4PW3FJI0	30	3.73546	0.00706039
tRF-Glu-TTC-025	TCCCTGGTGGTCTAGTGGCTAGGATTCGGCGC	5´tiRNA	-	tRF-32-87R8WP9I1EWJM	32	3.6488	0.00682898
tRF-Gly-TCC-054	TCGATTCCCGGCCAACGCACCA	tRF-3b	3026b	tRF-22-WE8SPOL52	22	3.63602	0.00684536
tRF-Gly-GCC-001	CGATTCCCGGCCAATGCACCA	tRF-3a	-	tRF-21-LNK8KEP1B	21	3.61289	0.0199057
tRF-Gly-CCC-003	GCGCCGCTGGTGTAGTGGTATCATGCAAGATTC	5´tiRNA	-	tRF-33-Q1Q89P9L842205	33	3.60041	0.0258617
tRF-Glu-TTC-021	TCCCATATGGTCTAGCGGTTAGGATTCCTGGT	5´tiRNA	-	tRF-32-86V8WPMN1E8YN	32	3.5945	0.00934306
tRF-Ser-GCT-046	CTCGGCTTTCCCTGCTAACTGGGCTTTTTTA	tRF-1	-	-	31	3.5145	0.00827588
tRF-Val-AAC-042	TCGAAACCGGGCGGAAACACCA	tRF-3b	3008b	tRF-22-WB08Q2B52	22	3.48598	0.00901098
tRF-Leu-AAG-030	TCGAATCCCACCGCTGCCACCA	tRF-3b	-	tRF-22-WB863IP52	22	3.45374	0.0082294
tRF-Glu-CTC-001	TCCCTGGTGGTCTAGTGGTTAGGATTCGGCGCTC	5´tiRNA	-	tRF-34-87R8WP9N1EWJI5	34	3.44712	0.00713806
tRF-Lys-CTT-008	GCCCGGCTAGCTCAGTCGGTAGAGCATGAGAC	5´tiRNA	-	tRF-32-PSQP4PW3FJI01	32	3.43621	0.00779058
tRF-Arg-TCG-016	GTCCTGCCGCGGTCGCCA	tRF-3a	-	tRF-18-S7PVRSD2	18	3.42897	0.0100722
tRF-Gly-GCC-005	GCATAGGTGGTTCAGTGGTAGAATTCTTGCCT	5´tiRNA	-	-	32	3.40911	0.0212824
tRF-Gly-GCC-002	GCATGGGTGGTTCAGTGGTAGAATTCTCGCCTG	5´tiRNA	-	tRF-33-P4R8YP9LON4VDP	33	3.40076	0.009147
tRF-Asp-GTC-010	TCCTCGTTAGTATAGTGGTGAGTATCCCCGCC	5´tiRNA	5032c	-	32	3.39862	0.0110009
tRF-Gly-CCC-046	TTCCCGGGCGGCGCACCA	tRF-3a	-	tRF-18-YRRHQFD2	18	3.33469	0.0142153
tRF-Leu-CAG-003	GTCAGGATGGCCGAGCGGTCTAAG	tRF-5b	-	tRF-24-SP5830MM2S	24	3.21626	0.039769
tRF-Tyr-GTA-040	TCGATTCCGGCTCGAAGGACCA	tRF-3b	3030b	tRF-22-WE884U1D2	22	3.21376	0.0126967
tRF-Ser-TGA-014	ACCCTGCTCGCTGCGCCA	tRF-3a	-	tRF-18-07QSNHD2	18	3.18836	0.017887
tRF-Ser-GCT-045	CTCGGCTTTCCCTGCTAACTGGGCTTTTT	tRF-1	-	-	29	3.15277	0.015757
tRF-Leu-TAA-048	AAGAGGAGTTGTTTTTCCTGGCAAAAACCTTT	tRF-1	-	-	32	3.15269	0.0151575
tRF-Val-AAC-020	AAACCGGGCGGAAACACCA	tRF-3a	-	tRF-19-B1RHODE2	19	3.11204	0.0496636
tRF-Glu-TTC-011	TCCCACATGGTCTAGCGGTTAGGATTCCTG	tRF-5c	-	tRF-30-86J8WPMN1E8Y	30	3.09881	0.0206328
tRF-Lys-CTT-005	GCCCGGCTAGCTCAGTCGGTAGAGCATGA	tRF-5c	-	tRF-29-PSQP4PW3FJFL	29	3.09703	0.0229885
tRF-Ala-AGC-016	CAATCCCCGGCACCTCCACCA	tRF-3a	-	tRF-21-2MK827K1B	21	3.00355	0.0370705
tRF-Ala-AGC-025	GCCCGCATTCTCCACCA	tRF-3a	-	tRF-17-PSJ9852	17	2.9744	0.0271722
tRF-Phe-GAA-001	CCCGGGTTTCGGCACCA	tRF-3a	3023a	tRF-17-K879652	17	2.95274	0.0201915
tRF-Ser-GCT-023	CTCGGCTTTCCCTGCTAACTGGGCTTTTTT	tRF-5c	-	-	30	2.92638	0.0238441
tRF-Asp-GTC-008	TCCTCGTTAGTATAGTGGTGAGTATCCCCG	tRF-5c	-	tRF-30-897PVP941QKS	30	2.91289	0.0403809
tRF-Gly-GCC-008	GCATGGGTGGTTCAGTGGTAGAATTCTCG	tRF-5c	-	tRF-29-P4R8YP9LONHK	29	2.88307	0.0256871
tRF-Val-AAC-001	AACCGGGCGGAAACACCA	tRF-3a	-	tRF-18-BS68BFD2	18	2.87755	0.0224801
tRF-Val-AAC-001	GTTTCCGTAGTGTAGTGGTCATCACGTTCGCCTA	5´tiRNA	-	-	34	2.86198	0.0300794
tRF-Ala-TGC-036	TCGATCCCCGACACCTCCACCA	tRF-3b	-	-	22	2.84684	0.0496053
tRF-Glu-TTC-020	TCCCATATGGTCTAGCGGTTAGGATTCCTGG	5´tiRNA	-	tRF-31-86V8WPMN1E8Y0	31	2.83762	0.0393818
tRF-Lys-CTT-007	GCCCGGCTAGCTCAGTCGGTAGAGCATGAGA	5´tiRNA	-	tRF-31-PSQP4PW3FJI0B	31	2.83086	0.0281235
tRF-Glu-TTC-001	TCCCACATGGTCTAGCGGTTAGGATTCCTGGTTT	5´tiRNA	-	tRF-34-86J8WPMN1E8Y2Q	34	2.79481	0.0324642
tRF-Ile-AAT-008	CCCCGTACGGGCCACCA	tRF-3a	-	tRF-17-KSU8P52	17	2.78272	0.0310617
tRF-Ser-GCT-022	CTCGGCTTTCCCTGCTAACTGGGCTTTT	tRF-1	-	-	28	2.77132	0.031342
tRF-Glu-TTC-024	TCCCTGGTGGTCTAGTGGCTAGGATTCGGCG	5´tiRNA	-	-	31	2.75903	0.0317026
tRF-Gly-GCC-007	GCATGGGTGGTTCAGTGGTAGAATTCTC	tRF-5c	-	tRF-28-P4R8YP9LOND5	28	2.75838	0.0333409
tRF-Glu-CTC-009	TCCCTGGTGGTCTAGTGGTTAGGATTCGGCG	5´tiRNA	5030c	tRF-31-87R8WP9N1EWJ0	31	2.7454	0.0262858
tRF-Gly-GCC-003	GCATTGGTGGTTCAGTGGTAGAATTCTCGCCTG	5´tiRNA	-	tRF-33-PNR8YP9LON4VDP	33	2.65061	0.0445437
tRF-Asn-GTT-005	CCCACCCAGGGACGCCA	tRF-3a	3033a	tRF-17-K5KKOV2	17	2.61256	0.0424334
tRF-Gly-CCC-011	GCATTGGTGGTTCAGTGGTAGAATTCTCG	tRF-5c	-	tRF-29-PNR8YP9LONHK	29	2.59763	0.0395238
tRF-Gly-CCC-042	TCCCGGGCGGCGCACCA	tRF-3a	-	tRF-17-8S68L52	17	2.5974	0.046808
tRF-Pro-AGG-005	GGCTCGTTGGTCTAGGGGTATGATTCTCGCT	5´tiRNA	-	tRF-31-6978WPRLXN4VE	31	2.59464	0.0418278
tRF-Lys-CTT-013	CCCCACGTTGGGCGCCA	tRF-3a	-	tRF-17-K6MY6V2	17	2.59169	0.0472769
tRF-Gly-CCC-023	AAAGGGTCTTTTTCACCCCGCTGTTGCTCTTT	tRF-1	-	-	32	2.59158	0.0351954
tRF-Pro-AGG-024	TCAAATCCCGGACGAGCCCCCA	tRF-3b	3002b	tRF-22-8B8SOUPR2	22	2.5841	0.0419273
tRF-Asn-GTT-059	GAAGTCGCATTTTGTGAACCCTGGGTTTTT	tRF-5c	-	-	30	2.55343	0.0496795
tRF-His-GTG-039	TTGTGGAAACAATGGTACGGCAAGGGCCTCTTT	tRF-1	-	-	33	2.55021	0.0471387
tRF-Gly-CCC-001	AGAGGGTCTTTTTCACCCCGCTGTTGCTCTTT	tRF-1	-	-	32	2.45824	0.0463168

## Sheet: Table S2_tRFs downregulated 
tRFs ID	tRFs Seq	tRF Type	tRFdb ID	MINTbase ID	Length	Fold Change	P-value
tRF-Thr-TGT-063	CCTGTTGGCTTACTTTTTT	tRF-1	-	-	19	0.129986	0.00711428
tRF-Val-TAC-094	TGGTGTGGTCTGTTGTTTT	tRF-1	-	-	19	0.237601	0.00276891
tRF-Cys-GCA-035	GCTGTGTTCTTATTTT	tRF-1	-	-	16	0.246519	0.0302944
tRF-Val-TAC-074	TGGTGTGGTCTGTTGTTT	tRF-1	-	-	18	0.256971	0.00421259
tRF-Glu-TTC-027	TGACTGGACCTTTCTTT	tRF-1	-	-	17	0.265328	0.0051577
tRF-Thr-TGT-059	CCTGTTGGCTTACTTTTA	tRF-1	-	-	18	0.265586	0.0137666
tRF-Cys-GCA-031	CTGTGCTCTGGAGTTTT	tRF-1	-	-	17	0.27643	0.0115598
tRF-Cys-GCA-059	ACCCTGTTTCACTTTT	tRF-1	-	-	16	0.286454	0.0261468
tRF-Arg-ACG-020	CTTGTGCTCTCACTTTTT	tRF-1	-	-	18	0.298758	0.0184187
tRF-Glu-TTC-073	TGACTGGACCTTTCTTTT	tRF-1	-	-	18	0.319971	0.0166146
tRF-Thr-CGT-014	TAGGGTGTGCGTGTTTT	tRF-1	-	-	17	0.326589	0.0184899
tRF-Pro-TGG-030	TCGTGGCTACTGTTTTT	tRF-1	-	-	17	0.332902	0.0187921
tRF-Gln-TTG-043	TCTTGGCTCTTTTTTT	tRF-1	-	-	16	0.37028	0.0466418
tRF-Thr-CGT-003	TAGGGTGTGCGTGTTTTT	tRF-1	1008	-	18	0.381569	0.0417222
tRF-Leu-AAG-039	GTGTGAGGTATTTTT	tRF-1	-	-	15	0.390341	0.0461542
tRF-Arg-CCT-008	GCCTGTGACTTTTG	tRF-1	-	-	14	0.390505	0.0399107
tRF-Thr-CGT-028	TAGGGTGTGCGTGTTT	tRF-1	-	-	16	0.397605	0.0478257
tRF-Thr-CGT-015	TAGGGTGTGCGTGTTTTTT	tRF-1	-	-	19	0.397979	0.0495531
tRF-Gln-CTG-011	GACTCTGAATCCAG	tRF-2	-	-	14	0.121813	0.000801092
tRF-Cys-GCA-047	TCCAGGTGCCCCTTCCA	tRF-3a	-	-	17	0.305915	0.0138094
tRF-Met-CAT-001	AGTAAGGTCAGCTAA	tRF-5a	-	-	15	0.206321	0.04587
tRF-Ser-AGA-004	GTAGTCGTGGCCGAGT	tRF-5a	-	tRF-16-S3M830E	16	0.387239	0.0425677
tRF-Gln-TTG-006	TAGGATGGGGTGTGATAGGTGG	tRF-5b	-	tRF-22-V29K9UV34	22	0.252665	0.0217202
tRF-Gln-TTG-036	TAGGATGGGGTGTGATAGGTGGCA	tRF-5b	-	tRF-24-V29K9UV3IU	24	0.169128	0.00560012
tRF-Met-CAT-011	AGTAAGGTCAGCTAAATAAGCTATCGGG	tRF-5c	-	tRF-28-1OR6QOH04MDY	28	0.183336	0.01414

## Sheet: Table S3_U54 analysis
Bioinformatic analysis to detect the presence of uridine at position 54 in mature tRNAs
Mature tRFs upregulated
Line	Type	tRF_Seq	AlignInfo
0	3'tiRNA	TGAATCTGACAACAGAGGCTTACGACCCCTTATTTACCA	chrM.tRNA11-HisGTG,GTAAATATAGTTTAACCAAAACATCAGATTGTGAATCTGACAACAGAGGCTTACGACCCCTTATTTACCCCA,His-GTG,31
1	3'tiRNA	TGAATCTGACAACAGAGGCTTACGACCCCTTATTTACCCA	chrM.tRNA11-HisGTG,GTAAATATAGTTTAACCAAAACATCAGATTGTGAATCTGACAACAGAGGCTTACGACCCCTTATTTACCCCA,His-GTG,31
2	5'tiRNA	GCCCGGATGATCCTCAGTGGTCTGGGGTGCAGGCTT	tRNA-SeC-TCA-1-1,GCCCGGATGATCCTCAGTGGTCTGGGGTGCAGGCTTCAAACCTGTAGCTGTCTAGCGACAGAGTGGTTCAATTCCACCTTTCGGGCGCCA,SeC-TCA,0
3	5'tiRNA	AGCAGAGTGGCGCAGCGGAAGCGTGCTGGGCCC	tRNA-iMet-CAT-1-1,AGCAGAGTGGCGCAGCGGAAGCGTGCTGGGCCCATAACCCAGAGGTCGATGGATCGAAACCATCCTCTGCTACCA,iMet-CAT,0;tRNA-iMet-CAT-2-1,AGCAGAGTGGCGCAGCGGAAGCGTGCTGGGCCCATAACCCAGAGGTCGATGGATCTAAACCATCCTCTGCTACCA,iMet-CAT,0
4	5'tiRNA	GTCAGGATGGCCGAGCGGTCTAAGGCGCTGCGTTC	tRNA-Leu-CAG-1-1,GTCAGGATGGCCGAGCGGTCTAAGGCGCTGCGTTCAGGTCGCAGTCTCCCCTGGAGGCGTGGGTTCGAATCCCACTCCTGACACCA,Leu-CAG,0;tRNA-Leu-CAG-2-1,GTCAGGATGGCCGAGCGGTCTAAGGCGCTGCGTTCAGGTCGCAGTCTCCCCTGGAGGCGTGGGTTCGAATCCCACTTCTGACACCA,Leu-CAG,0
5	5'tiRNA	GGCTCGTTGGTCTAGGGGTATGATTCTCGCTTC	tRNA-Pro-CGG-1-1,GGCTCGTTGGTCTAGGGGTATGATTCTCGCTTCGGGTGCGAGAGGTCCCGGGTTCAAATCCCGGACGAGCCCCCA,Pro-CGG,0;tRNA-Pro-CGG-2-1,GGCTCGTTGGTCTAGGGGTATGATTCTCGCTTCGGGTGTGAGAGGTCCCGGGTTCAAATCCCGGACGAGCCCCCA,Pro-CGG,0
6	5'tiRNA	CAGAGAATAGTTTAAATTAGAATCTTAGCTTT	chrM.tRNA15-ProTGG,CAGAGAATAGTTTAAATTAGAATCTTAGCTTTGGGTGCTAATGGTGGAGTTAAAGACTTTTTCTCTGACCA,Pro-TGG,0
7	5'tiRNA	GCGCCGCTGGTGTAGTGGTATCATGCAAGATTC	tRNA-Gly-CCC-2-1,GCGCCGCTGGTGTAGTGGTATCATGCAAGATTCCCATTCTTGCGACCCGGGTTCGATTCCCGGGCGGCGCACCA,Gly-CCC,0
8	5'tiRNA	GCATGGGTGGTTCAGTGGTAGAATTCTCGCCTG	tRNA-Gly-GCC-1-1,GCATGGGTGGTTCAGTGGTAGAATTCTCGCCTGCCACGCGGGAGGCCCGGGTTCGATTCCCGGCCCATGCACCA,Gly-GCC,0
9	5'tiRNA	GTTTCCGTAGTGTAGTGGTCATCACGTTCGCCTA	tRNA-Val-AAC-2-1,GTTTCCGTAGTGTAGTGGTCATCACGTTCGCCTAACACGCGAAAGGTCCCCGGTTCGAAACCGGGCGGAAACACCA,Val-AAC,0
10	5'tiRNA	GCATTGGTGGTTCAGTGGTAGAATTCTCGCCTG	tRNA-Gly-GCC-2-1,GCATTGGTGGTTCAGTGGTAGAATTCTCGCCTGCCACGCGGGAGGCCCGGGTTCGATTCCCGGCCAATGCACCA,Gly-GCC,0;tRNA-Gly-GCC-3-1,GCATTGGTGGTTCAGTGGTAGAATTCTCGCCTGCCACGCGGGAGGCCCGGGTTTGATTCCCGGCCAGTGCACCA,Gly-GCC,0;tRNA-Gly-GCC-5-1,GCATTGGTGGTTCAGTGGTAGAATTCTCGCCTGCCATGCGGGCGGCCGGGCTTCGATTCCTGGCCAATGCACCA,Gly-GCC,0
11	5'tiRNA	TCCCTGGTGGTCTAGTGGTTAGGATTCGGCGCTC	tRNA-Glu-CTC-1-1,TCCCTGGTGGTCTAGTGGTTAGGATTCGGCGCTCTCACCGCCGCGGCCCGGGTTCGATTCCCGGTCAGGGAACCA,Glu-CTC,0;tRNA-Glu-CTC-2-1,TCCCTGGTGGTCTAGTGGTTAGGATTCGGCGCTCTCACCGCCGCGGCCCGGGTTCGATTCCCGGTCAGGAAACCA,Glu-CTC,0
12	5'tiRNA	TCCCACATGGTCTAGCGGTTAGGATTCCTGGTTT	tRNA-Glu-TTC-2-1,TCCCACATGGTCTAGCGGTTAGGATTCCTGGTTTTCACCCAGGCGGCCCGGGTTCGACTCCCGGTGTGGGAACCA,Glu-TTC,0
13	tRF-3a	ACCAGGCGGAAACACCA	tRNA-Val-AAC-3-1,GTTTCCGTAGTGTAGTGGTTATCACGTTCGCCTAACACGCGAAAGGTCCCTGGATCAAAACCAGGCGGAAACACCA,Val-AAC,59;tRNA-Val-CAC-6-1,GTTTCCGTAGTGGAGTGGTTATCACGTTCGCCTCACACGCGAAAGGTCCCCGGTTTGAAACCAGGCGGAAACACCA,Val-CAC,59
14	tRF-3a	GTCCCTGTTCGGGCGCCA	tRNA-Lys-TTT-3-1,GCCCGGATAGCTCAGTCGGTAGAGCATCAGACTTTTAATCTGAGGGTCCAGGGTTCAAGTCCCTGTTCGGGCGCCA,Lys-TTT,58;tRNA-Lys-TTT-5-1,GCCCGGATAGCTCAGTCGGTAGAGCATCAGACTTTTAATCTGAGGGTCCGGGGTTCAAGTCCCTGTTCGGGCGCCA,Lys-TTT,58
15	tRF-3a	GCCCACCCAGGGACGCCA	tRNA-Asn-GTT-2-1,GTCTCTGTGGCGCAATCGGTTAGCGCGTTCGGCTGTTAACCGAAAGGTTGGTGGTTCGAGCCCACCCAGGGACGCCA,Asn-GTT,59;tRNA-Asn-GTT-3-1,GTCTCTGTGGCGCAATCGGTTAGCGCATTCGGCTGTTAACCGAAAGGTTGGTGGTTCGAGCCCACCCAGGGACGCCA,Asn-GTT,59;tRNA-Asn-GTT-4-1,GTCTCTGTGGCGCAATCGGTTAGCGCGTTCGGCTGTTAACCGAAAGATTGGTGGTTCGAGCCCACCCAGGGACGCCA,Asn-GTT,59;tRNA-Asn-GTT-5-1,GTCTCTGTGGCGCAATCGGTTAGCGCGTTCGGCTGTTAACTGAAAGGTTGGTGGTTCGAGCCCA…
16	tRF-3a	GTCCTGCCGCGGTCGCCA	tRNA-Arg-TCG-1-1,GGCCGCGTGGCCTAATGGATAAGGCGTCTGACTTCGGATCAGAAGATTGCAGGTTCGAGTCCTGCCGCGGTCGCCA,Arg-TCG,58
17	tRF-3a	ATCCCACCGCTGCCACCA	tRNA-Leu-AAG-1-1,GGTAGCGTGGCCGAGCGGTCTAAGGCGCTGGATTAAGGCTCCAGTCTCTTCGGAGGCGTGGGTTCGAATCCCACCGCTGCCACCA,Leu-AAG,67;tRNA-Leu-AAG-2-1,GGTAGCGTGGCCGAGCGGTCTAAGGCGCTGGATTAAGGCTCCAGTCTCTTCGGGGGCGTGGGTTCGAATCCCACCGCTGCCACCA,Leu-AAG,67;tRNA-Leu-AAG-3-1,GGTAGCGTGGCCGAGCGGTCTAAGGCGCTGGATTAAGGCTCCAGTCTCTTCGGGGGCGTGGGTTCAAATCCCACCGCTGCCACCA,Leu-AAG,67;tRNA-Leu-AAG-4-1,GGTAGCGTGGCCGAGTGGTCTAAGACGCTGGATTAAGGCT…
18	tRF-3a	ACCCTGCTCGCTGCGCCA	tRNA-Ser-TGA-1-1,GCAGCGATGGCCGAGTGGTTAAGGCGTTGGACTTGAAATCCAATGGGGTCTCCCCGCGCAGGTTCGAACCCTGCTCGCTGCGCCA,Ser-TGA,67
19	tRF-3a	TTCCCGGGCGGCGCACCA	tRNA-Gly-CCC-2-1,GCGCCGCTGGTGTAGTGGTATCATGCAAGATTCCCATTCTTGCGACCCGGGTTCGATTCCCGGGCGGCGCACCA,Gly-CCC,56
20	tRF-3a	GCCCGCATTCTCCACCA	tRNA-Ala-AGC-11-1,GGGGAATTAGCTCAAATGGTAGAGCGCTCGCTTAGCATGCGAGAGGTAGCGGGATCGATGCCCGCATTCTCCACCA,Ala-AGC,59;tRNA-Ala-AGC-15-1,GGGGAATTAGCTCAAGTGGTAGAGCGCTCGCTTAGCATGCGAGAGGTAGTGGGATCGATGCCCGCATTCTCCACCA,Ala-AGC,59;tRNA-Ala-AGC-9-1,GGGGAATTAGCTCAGGCGGTAGAGCGCTCGCTTAGCATGCGAGAGGTAGCGGGATCGACGCCCGCATTCTCCACCA,Ala-AGC,59
21	tRF-3a	CCCGGGTTTCGGCACCA	tRNA-Phe-GAA-1-1,GCCGAAATAGCTCAGTTGGGAGAGCGTTAGACTGAAGATCTAAAGGTCCCTGGTTCGATCCCGGGTTTCGGCACCA,Phe-GAA,59;tRNA-Phe-GAA-2-1,GCCGAAATAGCTCAGTTGGGAGAGCGTTAGACTGAAGATCTAAAGGTCCCTGGTTCAATCCCGGGTTTCGGCACCA,Phe-GAA,59;tRNA-Phe-GAA-3-1,GCCGAGATAGCTCAGTTGGGAGAGCGTTAGACTGAAGATCTAAAGGTCCCTGGTTCAATCCCGGGTTTCGGCACCA,Phe-GAA,59;tRNA-Phe-GAA-4-1,GCCGAAATAGCTCAGTTGGGAGAGCGTTAGACCGAAGATCTTAAAGGTCCCTGGTTCAATCCCGGGT…
22	tRF-3a	AACCGGGCGGAAACACCA	tRNA-Val-AAC-1-1,GTTTCCGTAGTGTAGTGGTTATCACGTTCGCCTAACACGCGAAAGGTCCCCGGTTCGAAACCGGGCGGAAACACCA,Val-AAC,58;tRNA-Val-AAC-2-1,GTTTCCGTAGTGTAGTGGTCATCACGTTCGCCTAACACGCGAAAGGTCCCCGGTTCGAAACCGGGCGGAAACACCA,Val-AAC,58;tRNA-Val-AAC-4-1,GTTTCCGTAGTGTAGTGGTTATCACGTTCGCCTAACACGCGAAAGGTCCGCGGTTCGAAACCGGGCGGAAACACCA,Val-AAC,58;tRNA-Val-CAC-1-1,GTTTCCGTAGTGTAGTGGTTATCACGTTCGCCTCACACGCGAAAGGTCCCCGGTTCGAAACCGGGCG…
23	tRF-3a	CCCCGTACGGGCCACCA	tRNA-Ile-AAT-1-1,GGCCGGTTAGCTCAGTTGGTTAGAGCGTGGCGCTAATAACGCCAAGGTCGCGGGTTCGATCCCCGTACGGGCCACCA,Ile-AAT,60;tRNA-Ile-AAT-4-1,GGCCGGTTAGCTCAGTTGGTTAGAGCGTGGTGCTAATAACGCCAAGGTCGCGGGTTCGAACCCCGTACGGGCCACCA,Ile-AAT,60;tRNA-Ile-AAT-5-1,GGCCGGTTAGCTCAGTTGGTTAGAGCGTGGTGCTAATAACGCCAAGGTCGCGGGTTCGATCCCCGTACGGGCCACCA,Ile-AAT,60;tRNA-Ile-AAT-7-1,GGCCGGTTAGCTCAGTTGGTCAGAGCGTGGTGCTAATAACGCCAAGGTCGCGGGTTCGATCCCC…
24	tRF-3a	TCCCGGGCGGCGCACCA	tRNA-Gly-CCC-2-1,GCGCCGCTGGTGTAGTGGTATCATGCAAGATTCCCATTCTTGCGACCCGGGTTCGATTCCCGGGCGGCGCACCA,Gly-CCC,57
25	tRF-3a	CCCCACGTTGGGCGCCA	tRNA-Lys-CTT-1-1,GCCCGGCTAGCTCAGTCGGTAGAGCATGGGACTCTTAATCCCAGGGTCGTGGGTTCGAGCCCCACGTTGGGCGCCA,Lys-CTT,59;tRNA-Lys-CTT-2-1,GCCCGGCTAGCTCAGTCGGTAGAGCATGAGACTCTTAATCTCAGGGTCGTGGGTTCGAGCCCCACGTTGGGCGCCA,Lys-CTT,59;tRNA-Lys-CTT-3-1,GCCCGGCTAGCTCAGTCGGTAGAGCATGAGACCCTTAATCTCAGGGTCGTGGGTTCGAGCCCCACGTTGGGCGCCA,Lys-CTT,59;tRNA-Lys-CTT-4-1,GCCCGGCTAGCTCAGTCGGTAGAGCATGGGACTCTTAATCTCAGGGTCGTGGGTTCGAGCCCCACGT…
26	tRF-3a	CCCACCCAGGGACGCCA	tRNA-Asn-GTT-1-1,GTCTCTGTGGCGCAATCGGTTAGCGCGTTCGGCTGTTAACCGAAAGGTTGGTGGTTCGATCCCACCCAGGGACGCCA,Asn-GTT,60;tRNA-Asn-GTT-2-1,GTCTCTGTGGCGCAATCGGTTAGCGCGTTCGGCTGTTAACCGAAAGGTTGGTGGTTCGAGCCCACCCAGGGACGCCA,Asn-GTT,60;tRNA-Asn-GTT-3-1,GTCTCTGTGGCGCAATCGGTTAGCGCATTCGGCTGTTAACCGAAAGGTTGGTGGTTCGAGCCCACCCAGGGACGCCA,Asn-GTT,60;tRNA-Asn-GTT-4-1,GTCTCTGTGGCGCAATCGGTTAGCGCGTTCGGCTGTTAACCGAAAGATTGGTGGTTCGAGCCCA…
27	tRF-3b	TCAAATCCCGGACGAGCCCCCA	tRNA-Pro-AGG-1-1,GGCTCGTTGGTCTAGGGGTATGATTCTCGCTTAGGATGCGAGAGGTCCCGGGTTCAAATCCCGGACGAGCCCCCA,Pro-AGG,53;tRNA-Pro-AGG-2-1,GGCTCGTTGGTCTAGGGGTATGATTCTCGCTTAGGGTGCGAGAGGTCCCGGGTTCAAATCCCGGACGAGCCCCCA,Pro-AGG,53;tRNA-Pro-CGG-1-1,GGCTCGTTGGTCTAGGGGTATGATTCTCGCTTCGGGTGCGAGAGGTCCCGGGTTCAAATCCCGGACGAGCCCCCA,Pro-CGG,53;tRNA-Pro-CGG-2-1,GGCTCGTTGGTCTAGGGGTATGATTCTCGCTTCGGGTGTGAGAGGTCCCGGGTTCAAATCCCGGACGAGC…
28	tRF-3b	TCGATTCCCGGCCAATGCACCA	tRNA-Gly-GCC-2-1,GCATTGGTGGTTCAGTGGTAGAATTCTCGCCTGCCACGCGGGAGGCCCGGGTTCGATTCCCGGCCAATGCACCA,Gly-GCC,52
29	tRF-3b	TCGATTCCCGGGCGGCGCACCA	tRNA-Gly-CCC-2-1,GCGCCGCTGGTGTAGTGGTATCATGCAAGATTCCCATTCTTGCGACCCGGGTTCGATTCCCGGGCGGCGCACCA,Gly-CCC,52
30	tRF-3a	CGATTCCCGGCCAACGCACCA	tRNA-Gly-TCC-1-1,GCGTTGGTGGTATAGTGGTTAGCATAGCTGCCTTCCAAGCAGTTGACCCGGGTTCGATTCCCGGCCAACGCACCA,Gly-TCC,54;tRNA-Gly-TCC-2-1,GCGTTGGTGGTATAGTGGTGAGCATAGCTGCCTTCCAAGCAGTTGACCCGGGTTCGATTCCCGGCCAACGCACCA,Gly-TCC,54;tRNA-Gly-TCC-3-1,GCGTTGGTGGTATAGTGGTAAGCATAGCTGCCTTCCAAGCAGTTGACCCGGGTTCGATTCCCGGCCAACGCACCA,Gly-TCC,54
31	tRF-3b	TCGAATCCTGCCGACTACGCCA	tRNA-Ser-AGA-1-1,GTAGTCGTGGCCGAGTGGTTAAGGCGATGGACTAGAAATCCATTGGGGTTTCCCCGCGCAGGTTCGAATCCTGCCGACTACGCCA,Ser-AGA,63;tRNA-Ser-AGA-2-1,GTAGTCGTGGCCGAGTGGTTAAGGCGATGGACTAGAAATCCATTGGGGTCTCCCCGCGCAGGTTCGAATCCTGCCGACTACGCCA,Ser-AGA,63;tRNA-Ser-AGA-3-1,GTAGTCGTGGCCGAGTGGTTAAGGCGATGGACTAGAAATCCATTGGGGTTTCCCCACGCAGGTTCGAATCCTGCCGACTACGCCA,Ser-AGA,63;tRNA-Ser-AGA-4-1,GTAGTCGTGGCCGAGTGGTTAAGGTGATGGACTAGAAACC…
32	tRF-3a	GATTCCCGGCCAACGCACCA	tRNA-Gly-TCC-1-1,GCGTTGGTGGTATAGTGGTTAGCATAGCTGCCTTCCAAGCAGTTGACCCGGGTTCGATTCCCGGCCAACGCACCA,Gly-TCC,55;tRNA-Gly-TCC-2-1,GCGTTGGTGGTATAGTGGTGAGCATAGCTGCCTTCCAAGCAGTTGACCCGGGTTCGATTCCCGGCCAACGCACCA,Gly-TCC,55;tRNA-Gly-TCC-3-1,GCGTTGGTGGTATAGTGGTAAGCATAGCTGCCTTCCAAGCAGTTGACCCGGGTTCGATTCCCGGCCAACGCACCA,Gly-TCC,55
33	tRF-3b	TCGATTCCCGGCCCATGCACCA	tRNA-Gly-GCC-1-1,GCATGGGTGGTTCAGTGGTAGAATTCTCGCCTGCCACGCGGGAGGCCCGGGTTCGATTCCCGGCCCATGCACCA,Gly-GCC,52
34	tRF-3b	TCGATCCCCGACACCTCCACCA	tRNA-Ala-TGC-5-1,GGGGGTGTAGCTCAGTGGTAGAGCGCATGCTTTGCATGTATGAGGCCTCGGGTTCGATCCCCGACACCTCCACCA,Ala-TGC,53;tRNA-Ala-TGC-7-1,GGGGGTGTAGCTCAGTGGTAGAGCGCATGCTTTGCATGTATGAGGCCTCGGTTCGATCCCCGACACCTCCACCA,Ala-TGC,52
35	tRF-3b	TCGATCCCCAGCATCTCCACCA	tRNA-Ala-AGC-4-1,GGGGATGTAGCTCAGTGGTAGAGCGCATGCTTAGCATGCATGAGGTCCCGGGTTCGATCCCCAGCATCTCCACCA,Ala-AGC,53
36	tRF-3b	TCGAATCCCAGCGGTGCCTCCA	tRNA-Thr-AGT-1-1,GGCGCCGTGGCTTAGTTGGTTAAAGCGCCTGTCTAGTAAACAGGAGATCCTGGGTTCGAATCCCAGCGGTGCCTCCA,Thr-AGT,55;tRNA-Thr-AGT-5-1,GGCGCCGTGGCTTAGCTGGTTAAAGCGCCTGTCTAGTAAACAGGAGATCCTGGGTTCGAATCCCAGCGGTGCCTCCA,Thr-AGT,55
37	tRF-3b	TCGATTCCCGGCCAACGCACCA	tRNA-Gly-TCC-1-1,GCGTTGGTGGTATAGTGGTTAGCATAGCTGCCTTCCAAGCAGTTGACCCGGGTTCGATTCCCGGCCAACGCACCA,Gly-TCC,53;tRNA-Gly-TCC-2-1,GCGTTGGTGGTATAGTGGTGAGCATAGCTGCCTTCCAAGCAGTTGACCCGGGTTCGATTCCCGGCCAACGCACCA,Gly-TCC,53;tRNA-Gly-TCC-3-1,GCGTTGGTGGTATAGTGGTAAGCATAGCTGCCTTCCAAGCAGTTGACCCGGGTTCGATTCCCGGCCAACGCACCA,Gly-TCC,53
38	tRF-3a	CGATTCCCGGCCAATGCACCA	tRNA-Gly-GCC-2-1,GCATTGGTGGTTCAGTGGTAGAATTCTCGCCTGCCACGCGGGAGGCCCGGGTTCGATTCCCGGCCAATGCACCA,Gly-GCC,53
39	tRF-3b	TCGAAACCGGGCGGAAACACCA	tRNA-Val-AAC-1-1,GTTTCCGTAGTGTAGTGGTTATCACGTTCGCCTAACACGCGAAAGGTCCCCGGTTCGAAACCGGGCGGAAACACCA,Val-AAC,54;tRNA-Val-AAC-2-1,GTTTCCGTAGTGTAGTGGTCATCACGTTCGCCTAACACGCGAAAGGTCCCCGGTTCGAAACCGGGCGGAAACACCA,Val-AAC,54;tRNA-Val-AAC-4-1,GTTTCCGTAGTGTAGTGGTTATCACGTTCGCCTAACACGCGAAAGGTCCGCGGTTCGAAACCGGGCGGAAACACCA,Val-AAC,54;tRNA-Val-CAC-1-1,GTTTCCGTAGTGTAGTGGTTATCACGTTCGCCTCACACGCGAAAGGTCCCCGGTTCGAAACCGGGCG…
40	tRF-3a	TCGAATCCCACCGCTGCCACCA	tRNA-Leu-AAG-1-1,GGTAGCGTGGCCGAGCGGTCTAAGGCGCTGGATTAAGGCTCCAGTCTCTTCGGAGGCGTGGGTTCGAATCCCACCGCTGCCACCA,Leu-AAG,63;tRNA-Leu-AAG-2-1,GGTAGCGTGGCCGAGCGGTCTAAGGCGCTGGATTAAGGCTCCAGTCTCTTCGGGGGCGTGGGTTCGAATCCCACCGCTGCCACCA,Leu-AAG,63;tRNA-Leu-TAG-1-1,GGTAGCGTGGCCGAGCGGTCTAAGGCGCTGGATTTAGGCTCCAGTCTCTTCGGAGGCGTGGGTTCGAATCCCACCGCTGCCACCA,Leu-TAG,63;tRNA-Leu-TAG-3-1,GGTAGCGTGGCCGAGTGGTCTAAGGCGCTGGATTTAGGCT…
41	tRF-3a	TCGATTCCGGCTCGAAGGACCA	tRNA-Tyr-GTA-2-1,CCTTCGATAGCTCAGTTGGTAGAGCGGAGGACTGTAGATCCTTAGGTCGCTGGTTCGATTCCGGCTCGAAGGACCA,Tyr-GTA,54;tRNA-Tyr-GTA-5-1,CCTTCGATAGCTCAGCTGGTAGAGCGGAGGACTGTAGATCCTTAGGTCGCTGGTTCGATTCCGGCTCGAAGGACCA,Tyr-GTA,54
42	tRF-3a	AAACCGGGCGGAAACACCA	tRNA-Val-AAC-1-1,GTTTCCGTAGTGTAGTGGTTATCACGTTCGCCTAACACGCGAAAGGTCCCCGGTTCGAAACCGGGCGGAAACACCA,Val-AAC,57;tRNA-Val-AAC-2-1,GTTTCCGTAGTGTAGTGGTCATCACGTTCGCCTAACACGCGAAAGGTCCCCGGTTCGAAACCGGGCGGAAACACCA,Val-AAC,57;tRNA-Val-AAC-4-1,GTTTCCGTAGTGTAGTGGTTATCACGTTCGCCTAACACGCGAAAGGTCCGCGGTTCGAAACCGGGCGGAAACACCA,Val-AAC,57;tRNA-Val-CAC-1-1,GTTTCCGTAGTGTAGTGGTTATCACGTTCGCCTCACACGCGAAAGGTCCCCGGTTCGAAACCGGGCG…
43	tRF-3a	CAATCCCCGGCACCTCCACCA	tRNA-Ala-AGC-2-1,GGGGGTGTAGCTCAGTGGTAGAGCGCGTGCTTAGCATGCACGAGGCCCCGGGTTCAATCCCCGGCACCTCCACCA,Ala-AGC,54;tRNA-Ala-AGC-3-1,GGGGGTGTAGCTCAGTGGTAGAGCGCGTGCTTAGCATGTACGAGGTCCCGGGTTCAATCCCCGGCACCTCCACCA,Ala-AGC,54
44	tRF-5b	GTCAGGATGGCCGAGCGGTCTAA	tRNA-Leu-CAG-1-1,GTCAGGATGGCCGAGCGGTCTAAGGCGCTGCGTTCAGGTCGCAGTCTCCCCTGGAGGCGTGGGTTCGAATCCCACTCCTGACACCA,Leu-CAG,0;tRNA-Leu-CAG-2-1,GTCAGGATGGCCGAGCGGTCTAAGGCGCTGCGTTCAGGTCGCAGTCTCCCCTGGAGGCGTGGGTTCGAATCCCACTTCTGACACCA,Leu-CAG,0
45	tRF-5b	GTCAGGATGGCCGAGCGGTCTAAG	tRNA-Leu-CAG-1-1,GTCAGGATGGCCGAGCGGTCTAAGGCGCTGCGTTCAGGTCGCAGTCTCCCCTGGAGGCGTGGGTTCGAATCCCACTCCTGACACCA,Leu-CAG,0;tRNA-Leu-CAG-2-1,GTCAGGATGGCCGAGCGGTCTAAGGCGCTGCGTTCAGGTCGCAGTCTCCCCTGGAGGCGTGGGTTCGAATCCCACTTCTGACACCA,Leu-CAG,0
46	5´tiRNA	GCATTGGTGGTTCAATGGTAGAATTCTCGCC	tRNA-Gly-CCC-3-1,GCATTGGTGGTTCAATGGTAGAATTCTCGCCTCCCACGCAGGAGACCCAGGTTCGATTCCTGGCCAATGCACCA,Gly-CCC,0
47	5´tiRNA	AGCAGAGTGGCGCAGCGGAAGCGTGCTGGGCC	tRNA-iMet-CAT-1-1,AGCAGAGTGGCGCAGCGGAAGCGTGCTGGGCCCATAACCCAGAGGTCGATGGATCGAAACCATCCTCTGCTACCA,iMet-CAT,0;tRNA-iMet-CAT-2-1,AGCAGAGTGGCGCAGCGGAAGCGTGCTGGGCCCATAACCCAGAGGTCGATGGATCTAAACCATCCTCTGCTACCA,iMet-CAT,0
48	5´tiRNA	GCATGGGTGGTTCAGTGGTAGAATTCTCGCC	tRNA-Gly-GCC-1-1,GCATGGGTGGTTCAGTGGTAGAATTCTCGCCTGCCACGCGGGAGGCCCGGGTTCGATTCCCGGCCCATGCACCA,Gly-GCC,0
49	5´tiRNA	GTTTCCGTAGTGTAGTGGTCATCACGTTCGCC	tRNA-Val-AAC-2-1,GTTTCCGTAGTGTAGTGGTCATCACGTTCGCCTAACACGCGAAAGGTCCCCGGTTCGAAACCGGGCGGAAACACCA,Val-AAC,0
50	5´tiRNA	GCATTGGTGGTTCAGTGGTAGAATTCTCGCC	tRNA-Gly-CCC-1-1,GCATTGGTGGTTCAGTGGTAGAATTCTCGCCTCCCACGCGGGAGACCCGGGTTCAATTCCCGGCCAATGCACCA,Gly-CCC,0;tRNA-Gly-GCC-2-1,GCATTGGTGGTTCAGTGGTAGAATTCTCGCCTGCCACGCGGGAGGCCCGGGTTCGATTCCCGGCCAATGCACCA,Gly-GCC,0;tRNA-Gly-GCC-3-1,GCATTGGTGGTTCAGTGGTAGAATTCTCGCCTGCCACGCGGGAGGCCCGGGTTTGATTCCCGGCCAGTGCACCA,Gly-GCC,0;tRNA-Gly-GCC-5-1,GCATTGGTGGTTCAGTGGTAGAATTCTCGCCTGCCATGCGGGCGGCCGGGCTTCGATTCCTGGCCAATGCACCA,G…
51	5´tiRNA	GCGTTGGTGGTATAGTGGTGAGCATAGCTGCC	tRNA-Gly-TCC-2-1,GCGTTGGTGGTATAGTGGTGAGCATAGCTGCCTTCCAAGCAGTTGACCCGGGTTCGATTCCCGGCCAACGCACCA,Gly-TCC,0
52	5´tiRNA	GCATAGGTGGTTCAGTGGTAGAATTCTTGCC	tRNA-Gly-GCC-4-1,GCATAGGTGGTTCAGTGGTAGAATTCTTGCCTGCCACGCAGGAGGCCCAGGTTTGATTCCTGGCCCATGCACCA,Gly-GCC,0
53	5´tiRNA	AGCAGAGTGGCGCAGCGGAAGCGTGCTGGGC	tRNA-iMet-CAT-1-1,AGCAGAGTGGCGCAGCGGAAGCGTGCTGGGCCCATAACCCAGAGGTCGATGGATCGAAACCATCCTCTGCTACCA,iMet-CAT,0;tRNA-iMet-CAT-2-1,AGCAGAGTGGCGCAGCGGAAGCGTGCTGGGCCCATAACCCAGAGGTCGATGGATCTAAACCATCCTCTGCTACCA,iMet-CAT,0
54	5´tiRNA	GTTTCCGTAGTGTAGCGGTTATCACATTCGC	tRNA-Val-CAC-3-1,GTTTCCGTAGTGTAGCGGTTATCACATTCGCCTCACACGCGAAAGGTCCCCGGTTCGATCCCGGGCGGAAACACCA,Val-CAC,0
55	tRF-5c	GCATTGGTGGTTCAGTGGTAGAATTCTCGC	tRNA-Gly-CCC-1-1,GCATTGGTGGTTCAGTGGTAGAATTCTCGCCTCCCACGCGGGAGACCCGGGTTCAATTCCCGGCCAATGCACCA,Gly-CCC,0;tRNA-Gly-GCC-2-1,GCATTGGTGGTTCAGTGGTAGAATTCTCGCCTGCCACGCGGGAGGCCCGGGTTCGATTCCCGGCCAATGCACCA,Gly-GCC,0;tRNA-Gly-GCC-3-1,GCATTGGTGGTTCAGTGGTAGAATTCTCGCCTGCCACGCGGGAGGCCCGGGTTTGATTCCCGGCCAGTGCACCA,Gly-GCC,0;tRNA-Gly-GCC-5-1,GCATTGGTGGTTCAGTGGTAGAATTCTCGCCTGCCATGCGGGCGGCCGGGCTTCGATTCCTGGCCAATGCACCA,G…
56	5´tiRNA	GTTTCCGTGGTGTAGTGGTTATCACATTCGCC	tRNA-Val-TAC-4-1,GTTTCCGTGGTGTAGTGGTTATCACATTCGCCTTACACGCGAAAGGTCCTCGGGTCGAAACCGAGCGGAAACACCA,Val-TAC,0
57	5´tiRNA	TCCCACATGGTCTAGCGGTTAGGATTCCTGGT	tRNA-Glu-TTC-2-1,TCCCACATGGTCTAGCGGTTAGGATTCCTGGTTTTCACCCAGGCGGCCCGGGTTCGACTCCCGGTGTGGGAACCA,Glu-TTC,0
58	5´tiRNA	GCGTTGGTGGTATAGTGGTGAGCATAGCTGC	tRNA-Gly-TCC-2-1,GCGTTGGTGGTATAGTGGTGAGCATAGCTGCCTTCCAAGCAGTTGACCCGGGTTCGATTCCCGGCCAACGCACCA,Gly-TCC,0
59	tRF-5c	GTTTCCGTAGTGTAGTGGTTATCACGTTCGC	tRNA-Val-AAC-1-1,GTTTCCGTAGTGTAGTGGTTATCACGTTCGCCTAACACGCGAAAGGTCCCCGGTTCGAAACCGGGCGGAAACACCA,Val-AAC,0;tRNA-Val-AAC-3-1,GTTTCCGTAGTGTAGTGGTTATCACGTTCGCCTAACACGCGAAAGGTCCCTGGATCAAAACCAGGCGGAAACACCA,Val-AAC,0;tRNA-Val-AAC-4-1,GTTTCCGTAGTGTAGTGGTTATCACGTTCGCCTAACACGCGAAAGGTCCGCGGTTCGAAACCGGGCGGAAACACCA,Val-AAC,0;tRNA-Val-CAC-1-1,GTTTCCGTAGTGTAGTGGTTATCACGTTCGCCTCACACGCGAAAGGTCCCCGGTTCGAAACCGGGCGGAA…
60	tRF-5c	GCGTTGGTGGTATAGTGGTGAGCATAGCTG	tRNA-Gly-TCC-2-1,GCGTTGGTGGTATAGTGGTGAGCATAGCTGCCTTCCAAGCAGTTGACCCGGGTTCGATTCCCGGCCAACGCACCA,Gly-TCC,0
61	tRF-5c	GCATGGGTGGTTCAGTGGTAGAATTCTCGC	tRNA-Gly-GCC-1-1,GCATGGGTGGTTCAGTGGTAGAATTCTCGCCTGCCACGCGGGAGGCCCGGGTTCGATTCCCGGCCCATGCACCA,Gly-GCC,0
62	5´tiRNA	GCCCGGCTAGCTCAGTCGGTAGAGCATGGG	tRNA-Lys-CTT-1-1,GCCCGGCTAGCTCAGTCGGTAGAGCATGGGACTCTTAATCCCAGGGTCGTGGGTTCGAGCCCCACGTTGGGCGCCA,Lys-CTT,0;tRNA-Lys-CTT-4-1,GCCCGGCTAGCTCAGTCGGTAGAGCATGGGACTCTTAATCTCAGGGTCGTGGGTTCGAGCCCCACGTTGGGCGCCA,Lys-CTT,0
63	5´tiRNA	GTTTCCGTAGTGTAGTGGTTATCACGTTCGCC	tRNA-Val-AAC-1-1,GTTTCCGTAGTGTAGTGGTTATCACGTTCGCCTAACACGCGAAAGGTCCCCGGTTCGAAACCGGGCGGAAACACCA,Val-AAC,0;tRNA-Val-AAC-3-1,GTTTCCGTAGTGTAGTGGTTATCACGTTCGCCTAACACGCGAAAGGTCCCTGGATCAAAACCAGGCGGAAACACCA,Val-AAC,0;tRNA-Val-AAC-4-1,GTTTCCGTAGTGTAGTGGTTATCACGTTCGCCTAACACGCGAAAGGTCCGCGGTTCGAAACCGGGCGGAAACACCA,Val-AAC,0;tRNA-Val-CAC-1-1,GTTTCCGTAGTGTAGTGGTTATCACGTTCGCCTCACACGCGAAAGGTCCCCGGTTCGAAACCGGGCGGAA…
64	5´tiRNA	GCATGGGTGGTTCAGTGGTAGAATTCTCGCCT	tRNA-Gly-GCC-1-1,GCATGGGTGGTTCAGTGGTAGAATTCTCGCCTGCCACGCGGGAGGCCCGGGTTCGATTCCCGGCCCATGCACCA,Gly-GCC,0
65	5´tiRNA	GCATTGGTGGTTCAATGGTAGAATTCTCGCCT	tRNA-Gly-CCC-3-1,GCATTGGTGGTTCAATGGTAGAATTCTCGCCTCCCACGCAGGAGACCCAGGTTCGATTCCTGGCCAATGCACCA,Gly-CCC,0
66	5´tiRNA	GTTTCCGTAGTGTAGCGGTTATCACATTCGCC	tRNA-Val-CAC-3-1,GTTTCCGTAGTGTAGCGGTTATCACATTCGCCTCACACGCGAAAGGTCCCCGGTTCGATCCCGGGCGGAAACACCA,Val-CAC,0
67	tRF-5c	TCCTCGTTAGTATAGTGGTGAGTATCCCCGC	tRNA-Asp-GTC-2-1,TCCTCGTTAGTATAGTGGTGAGTATCCCCGCCTGTCACGCGGGAGACCGGGGTTCGATTCCCCGACGGGGAGCCA,Asp-GTC,0
68	5´tiRNA	GCGTTGGTGGTATAGTGGTAAGCATAGCTGCC	tRNA-Gly-TCC-3-1,GCGTTGGTGGTATAGTGGTAAGCATAGCTGCCTTCCAAGCAGTTGACCCGGGTTCGATTCCCGGCCAACGCACCA,Gly-TCC,0
69	5´tiRNA	GCATTGGTGGTTCAGTGGTAGAATTCTCGCCT	tRNA-Gly-CCC-1-1,GCATTGGTGGTTCAGTGGTAGAATTCTCGCCTCCCACGCGGGAGACCCGGGTTCAATTCCCGGCCAATGCACCA,Gly-CCC,0;tRNA-Gly-GCC-2-1,GCATTGGTGGTTCAGTGGTAGAATTCTCGCCTGCCACGCGGGAGGCCCGGGTTCGATTCCCGGCCAATGCACCA,Gly-GCC,0;tRNA-Gly-GCC-3-1,GCATTGGTGGTTCAGTGGTAGAATTCTCGCCTGCCACGCGGGAGGCCCGGGTTTGATTCCCGGCCAGTGCACCA,Gly-GCC,0;tRNA-Gly-GCC-5-1,GCATTGGTGGTTCAGTGGTAGAATTCTCGCCTGCCATGCGGGCGGCCGGGCTTCGATTCCTGGCCAATGCACCA,G…
70	5´tiRNA	GCTTCTGTAGTGTAGTGGTTATCACGTTCGCC	tRNA-Val-CAC-2-1,GCTTCTGTAGTGTAGTGGTTATCACGTTCGCCTCACACGCGAAAGGTCCCCGGTTCGAAACCGGGCAGAAGCACCA,Val-CAC,0
71	5´tiRNA	TCCCTGGTGGTCTAGTGGTTAGGATTCGGCGC	tRNA-Glu-CTC-1-1,TCCCTGGTGGTCTAGTGGTTAGGATTCGGCGCTCTCACCGCCGCGGCCCGGGTTCGATTCCCGGTCAGGGAACCA,Glu-CTC,0;tRNA-Glu-CTC-2-1,TCCCTGGTGGTCTAGTGGTTAGGATTCGGCGCTCTCACCGCCGCGGCCCGGGTTCGATTCCCGGTCAGGAAACCA,Glu-CTC,0
72	tRF-5c	GCGCCGCTGGTGTAGTGGTATCATGCAAGA	tRNA-Gly-CCC-2-1,GCGCCGCTGGTGTAGTGGTATCATGCAAGATTCCCATTCTTGCGACCCGGGTTCGATTCCCGGGCGGCGCACCA,Gly-CCC,0
73	5´tiRNA	GCGCCGCTGGTGTAGTGGTATCATGCAAGATT	tRNA-Gly-CCC-2-1,GCGCCGCTGGTGTAGTGGTATCATGCAAGATTCCCATTCTTGCGACCCGGGTTCGATTCCCGGGCGGCGCACCA,Gly-CCC,0
74	tRF-5c	GCCCGGCTAGCTCAGTCGGTAGAGCATGAG	tRNA-Lys-CTT-2-1,GCCCGGCTAGCTCAGTCGGTAGAGCATGAGACTCTTAATCTCAGGGTCGTGGGTTCGAGCCCCACGTTGGGCGCCA,Lys-CTT,0;tRNA-Lys-CTT-3-1,GCCCGGCTAGCTCAGTCGGTAGAGCATGAGACCCTTAATCTCAGGGTCGTGGGTTCGAGCCCCACGTTGGGCGCCA,Lys-CTT,0
75	5´tiRNA	TCCCTGGTGGTCTAGTGGCTAGGATTCGGCGC	tRNA-Glu-TTC-3-1,TCCCTGGTGGTCTAGTGGCTAGGATTCGGCGCTTTCACCGCCGCGGCCCGGGTTCGATTCCCGGCCAGGGAACCA,Glu-TTC,0;tRNA-Glu-TTC-4-1,TCCCTGGTGGTCTAGTGGCTAGGATTCGGCGCTTTCACCGCCGCGGCCCGGGTTCGATTCCCGGTCAGGGAACCA,Glu-TTC,0
76	5´tiRNA	TCCCATATGGTCTAGCGGTTAGGATTCCTGGT	tRNA-Glu-TTC-1-1,TCCCATATGGTCTAGCGGTTAGGATTCCTGGTTTTCACCCAGGTGGCCCGGGTTCGACTCCCGGTATGGGAACCA,Glu-TTC,0
77	5´tiRNA	GCCCGGCTAGCTCAGTCGGTAGAGCATGAGAC	tRNA-Lys-CTT-2-1,GCCCGGCTAGCTCAGTCGGTAGAGCATGAGACTCTTAATCTCAGGGTCGTGGGTTCGAGCCCCACGTTGGGCGCCA,Lys-CTT,0;tRNA-Lys-CTT-3-1,GCCCGGCTAGCTCAGTCGGTAGAGCATGAGACCCTTAATCTCAGGGTCGTGGGTTCGAGCCCCACGTTGGGCGCCA,Lys-CTT,0
78	5´tiRNA	GCATAGGTGGTTCAGTGGTAGAATTCTTGCCT	tRNA-Gly-GCC-4-1,GCATAGGTGGTTCAGTGGTAGAATTCTTGCCTGCCACGCAGGAGGCCCAGGTTTGATTCCTGGCCCATGCACCA,Gly-GCC,0
79	5´tiRNA	TCCTCGTTAGTATAGTGGTGAGTATCCCCGCC	tRNA-Asp-GTC-2-1,TCCTCGTTAGTATAGTGGTGAGTATCCCCGCCTGTCACGCGGGAGACCGGGGTTCGATTCCCCGACGGGGAGCCA,Asp-GTC,0
80	tRF-5c	TCCCACATGGTCTAGCGGTTAGGATTCCTG	tRNA-Glu-TTC-2-1,TCCCACATGGTCTAGCGGTTAGGATTCCTGGTTTTCACCCAGGCGGCCCGGGTTCGACTCCCGGTGTGGGAACCA,Glu-TTC,0
81	tRF-5c	GCCCGGCTAGCTCAGTCGGTAGAGCATGA	tRNA-Lys-CTT-2-1,GCCCGGCTAGCTCAGTCGGTAGAGCATGAGACTCTTAATCTCAGGGTCGTGGGTTCGAGCCCCACGTTGGGCGCCA,Lys-CTT,0;tRNA-Lys-CTT-3-1,GCCCGGCTAGCTCAGTCGGTAGAGCATGAGACCCTTAATCTCAGGGTCGTGGGTTCGAGCCCCACGTTGGGCGCCA,Lys-CTT,0
82	tRF-5c	TCCTCGTTAGTATAGTGGTGAGTATCCCCG	tRNA-Asp-GTC-2-1,TCCTCGTTAGTATAGTGGTGAGTATCCCCGCCTGTCACGCGGGAGACCGGGGTTCGATTCCCCGACGGGGAGCCA,Asp-GTC,0
83	tRF-5c	GCATGGGTGGTTCAGTGGTAGAATTCTCG	tRNA-Gly-GCC-1-1,GCATGGGTGGTTCAGTGGTAGAATTCTCGCCTGCCACGCGGGAGGCCCGGGTTCGATTCCCGGCCCATGCACCA,Gly-GCC,0
84	5´tiRNA	TCCCATATGGTCTAGCGGTTAGGATTCCTGG	tRNA-Glu-TTC-1-1,TCCCATATGGTCTAGCGGTTAGGATTCCTGGTTTTCACCCAGGTGGCCCGGGTTCGACTCCCGGTATGGGAACCA,Glu-TTC,0
85	5´tiRNA	GCCCGGCTAGCTCAGTCGGTAGAGCATGAGA	tRNA-Lys-CTT-2-1,GCCCGGCTAGCTCAGTCGGTAGAGCATGAGACTCTTAATCTCAGGGTCGTGGGTTCGAGCCCCACGTTGGGCGCCA,Lys-CTT,0;tRNA-Lys-CTT-3-1,GCCCGGCTAGCTCAGTCGGTAGAGCATGAGACCCTTAATCTCAGGGTCGTGGGTTCGAGCCCCACGTTGGGCGCCA,Lys-CTT,0
86	5´tiRNA	GGCTCGTTGGTCTAGGGGTATGATTCTCGCT	tRNA-Pro-AGG-1-1,GGCTCGTTGGTCTAGGGGTATGATTCTCGCTTAGGATGCGAGAGGTCCCGGGTTCAAATCCCGGACGAGCCCCCA,Pro-AGG,0;tRNA-Pro-AGG-2-1,GGCTCGTTGGTCTAGGGGTATGATTCTCGCTTAGGGTGCGAGAGGTCCCGGGTTCAAATCCCGGACGAGCCCCCA,Pro-AGG,0;tRNA-Pro-CGG-1-1,GGCTCGTTGGTCTAGGGGTATGATTCTCGCTTCGGGTGCGAGAGGTCCCGGGTTCAAATCCCGGACGAGCCCCCA,Pro-CGG,0;tRNA-Pro-CGG-2-1,GGCTCGTTGGTCTAGGGGTATGATTCTCGCTTCGGGTGTGAGAGGTCCCGGGTTCAAATCCCGGACGAGCCCC…
87	5'tiRNA	TCCCTGGTGGTCTAGTGGCTAGGATTCGGCG	tRNA-Glu-TTC-3-1,TCCCTGGTGGTCTAGTGGCTAGGATTCGGCGCTTTCACCGCCGCGGCCCGGGTTCGATTCCCGGCCAGGGAACCA,Glu-TTC,0;tRNA-Glu-TTC-4-1,TCCCTGGTGGTCTAGTGGCTAGGATTCGGCGCTTTCACCGCCGCGGCCCGGGTTCGATTCCCGGTCAGGGAACCA,Glu-TTC,0
88	5´tiRNA	GCATGGGTGGTTCAGTGGTAGAATTCTC	tRNA-Gly-GCC-1-1,GCATGGGTGGTTCAGTGGTAGAATTCTCGCCTGCCACGCGGGAGGCCCGGGTTCGATTCCCGGCCCATGCACCA,Gly-GCC,0
89	5´tiRNA	TCCCTGGTGGTCTAGTGGTTAGGATTCGGCG	tRNA-Glu-CTC-1-1,TCCCTGGTGGTCTAGTGGTTAGGATTCGGCGCTCTCACCGCCGCGGCCCGGGTTCGATTCCCGGTCAGGGAACCA,Glu-CTC,0;tRNA-Glu-CTC-2-1,TCCCTGGTGGTCTAGTGGTTAGGATTCGGCGCTCTCACCGCCGCGGCCCGGGTTCGATTCCCGGTCAGGAAACCA,Glu-CTC,0
90	tRF-5c	GCATTGGTGGTTCAGTGGTAGAATTCTCG	tRNA-Gly-CCC-1-1,GCATTGGTGGTTCAGTGGTAGAATTCTCGCCTCCCACGCGGGAGACCCGGGTTCAATTCCCGGCCAATGCACCA,Gly-CCC,0;tRNA-Gly-GCC-2-1,GCATTGGTGGTTCAGTGGTAGAATTCTCGCCTGCCACGCGGGAGGCCCGGGTTCGATTCCCGGCCAATGCACCA,Gly-GCC,0;tRNA-Gly-GCC-3-1,GCATTGGTGGTTCAGTGGTAGAATTCTCGCCTGCCACGCGGGAGGCCCGGGTTTGATTCCCGGCCAGTGCACCA,Gly-GCC,0;tRNA-Gly-GCC-5-1,GCATTGGTGGTTCAGTGGTAGAATTCTCGCCTGCCATGCGGGCGGCCGGGCTTCGATTCCTGGCCAATGCACCA,G…
	Uridine at position 54 (U54): NOT DETECTED
Line:
6	chrM.tRNA15-ProTGG	Pro-TGG
21	tRNA-Phe-GAA-4-1	Phe-GAA
22	tRNA-Val-CAC-5-1	Val-CAC
39	tRNA-Val-CAC-5-1	Val-CAC
41	tRNA-Tyr-GTA-2-1	Tyr-GTA
41	tRNA-Tyr-GTA-5-1	Tyr-GTA
42	tRNA-Val-CAC-5-1	Val-CAC
59	tRNA-Val-CAC-5-1	Val-CAC
63	tRNA-Val-CAC-5-1	Val-CAC
	Uridine at position 54 (U54): DETECTED
Line:
3	tRNA-iMet-CAT-1-1	iMet-CAT
3	tRNA-iMet-CAT-2-1	iMet-CAT
5	tRNA-Pro-CGG-1-1	Pro-CGG
5	tRNA-Pro-CGG-2-1	Pro-CGG
9	tRNA-Val-AAC-2-1	Val-AAC
10	tRNA-Gly-GCC-3-1	Gly-GCC
11	tRNA-Glu-CTC-1-1	Glu-CTC
11	tRNA-Glu-CTC-2-1	Glu-CTC
12	tRNA-Glu-TTC-2-1	Glu-TTC
13	tRNA-Val-CAC-6-1	Val-CAC
14	tRNA-Lys-TTT-3-1	Lys-TTT
14	tRNA-Lys-TTT-5-1	Lys-TTT
16	tRNA-Arg-TCG-1-1	Arg-TCG
17	tRNA-Leu-TAG-3-1	Leu-TAG
21	tRNA-Phe-GAA-1-1	Phe-GAA
21	tRNA-Phe-GAA-2-1	Phe-GAA
21	tRNA-Phe-GAA-3-1	Phe-GAA
22	tRNA-Val-AAC-1-1	Val-AAC
22	tRNA-Val-AAC-2-1	Val-AAC
22	tRNA-Val-AAC-4-1	Val-AAC
22	tRNA-Val-CAC-1-1	Val-CAC
25	tRNA-Lys-CTT-1-1	Lys-CTT
25	tRNA-Lys-CTT-2-1	Lys-CTT
25	tRNA-Lys-CTT-3-1	Lys-CTT
25	tRNA-Lys-CTT-4-1	Lys-CTT
27	tRNA-Pro-AGG-1-1	Pro-AGG
27	tRNA-Pro-AGG-2-1	Pro-AGG
27	tRNA-Pro-CGG-1-1	Pro-CGG
27	tRNA-Pro-CGG-2-1	Pro-CGG
27	tRNA-Pro-TGG-1-1	Pro-TGG
27	tRNA-Pro-TGG-2-1	Pro-TGG
27	tRNA-Pro-TGG-3-1	Pro-TGG
30	tRNA-Gly-TCC-1-1	Gly-TCC
30	tRNA-Gly-TCC-2-1	Gly-TCC
30	tRNA-Gly-TCC-3-1	Gly-TCC
32	tRNA-Gly-TCC-1-1	Gly-TCC
32	tRNA-Gly-TCC-2-1	Gly-TCC
32	tRNA-Gly-TCC-3-1	Gly-TCC
34	tRNA-Ala-TGC-5-1	Ala-TGC
35	tRNA-Ala-AGC-4-1	Ala-AGC
37	tRNA-Gly-TCC-1-1	Gly-TCC
37	tRNA-Gly-TCC-2-1	Gly-TCC
37	tRNA-Gly-TCC-3-1	Gly-TCC
39	tRNA-Val-AAC-1-1	Val-AAC
39	tRNA-Val-AAC-2-1	Val-AAC
39	tRNA-Val-AAC-4-1	Val-AAC
39	tRNA-Val-CAC-1-1	Val-CAC
40	tRNA-Leu-TAG-3-1	Leu-TAG
41	tRNA-Tyr-GTA-2-1	Tyr-GTA
41	tRNA-Tyr-GTA-5-1	Tyr-GTA
42	tRNA-Val-AAC-1-1	Val-AAC
42	tRNA-Val-AAC-2-1	Val-AAC
42	tRNA-Val-AAC-4-1	Val-AAC
42	tRNA-Val-CAC-1-1	Val-CAC
43	tRNA-Ala-AGC-2-1	Ala-AGC
43	tRNA-Ala-AGC-3-1	Ala-AGC
47	tRNA-iMet-CAT-1-1	iMet-CAT
47	tRNA-iMet-CAT-2-1	iMet-CAT
49	tRNA-Val-AAC-2-1	Val-AAC
50	tRNA-Gly-GCC-3-1	Gly-GCC
51	tRNA-Gly-TCC-2-1	Gly-TCC
52	tRNA-Gly-GCC-4-1	Gly-GCC
53	tRNA-iMet-CAT-1-1	iMet-CAT
53	tRNA-iMet-CAT-2-1	iMet-CAT
54	tRNA-Val-CAC-3-1	Val-CAC
55	tRNA-Gly-GCC-3-1	Gly-GCC
57	tRNA-Glu-TTC-2-1	Glu-TTC
58	tRNA-Gly-TCC-2-1	Gly-TCC
59	tRNA-Val-AAC-1-1	Val-AAC
59	tRNA-Val-AAC-4-1	Val-AAC
59	tRNA-Val-CAC-1-1	Val-CAC
59	tRNA-Val-CAC-4-1	Val-CAC
60	tRNA-Gly-TCC-2-1	Gly-TCC
62	tRNA-Lys-CTT-1-1	Lys-CTT
62	tRNA-Lys-CTT-4-1	Lys-CTT
63	tRNA-Val-AAC-1-1	Val-AAC
63	tRNA-Val-AAC-4-1	Val-AAC
63	tRNA-Val-CAC-1-1	Val-CAC
63	tRNA-Val-CAC-4-1	Val-CAC
66	tRNA-Val-CAC-3-1	Val-CAC
67	tRNA-Asp-GTC-2-1	Asp-GTC
68	tRNA-Gly-TCC-3-1	Gly-TCC
69	tRNA-Gly-GCC-3-1	Gly-GCC
70	tRNA-Val-CAC-2-1	Val-CAC
71	tRNA-Glu-CTC-1-1	Glu-CTC
71	tRNA-Glu-CTC-2-1	Glu-CTC
74	tRNA-Lys-CTT-2-1	Lys-CTT
74	tRNA-Lys-CTT-3-1	Lys-CTT
75	tRNA-Glu-TTC-3-1	Glu-TTC
75	tRNA-Glu-TTC-4-1	Glu-TTC
76	tRNA-Glu-TTC-1-1	Glu-TTC
77	tRNA-Lys-CTT-2-1	Lys-CTT
77	tRNA-Lys-CTT-3-1	Lys-CTT
78	tRNA-Gly-GCC-4-1	Gly-GCC
79	tRNA-Asp-GTC-2-1	Asp-GTC
80	tRNA-Glu-TTC-2-1	Glu-TTC
81	tRNA-Lys-CTT-2-1	Lys-CTT
81	tRNA-Lys-CTT-3-1	Lys-CTT
82	tRNA-Asp-GTC-2-1	Asp-GTC
84	tRNA-Glu-TTC-1-1	Glu-TTC
85	tRNA-Lys-CTT-2-1	Lys-CTT
85	tRNA-Lys-CTT-3-1	Lys-CTT
86	tRNA-Pro-AGG-1-1	Pro-AGG
86	tRNA-Pro-AGG-2-1	Pro-AGG
86	tRNA-Pro-CGG-1-1	Pro-CGG
86	tRNA-Pro-CGG-2-1	Pro-CGG
86	tRNA-Pro-TGG-3-1	Pro-TGG
87	tRNA-Glu-TTC-3-1	Glu-TTC
87	tRNA-Glu-TTC-4-1	Glu-TTC
89	tRNA-Glu-CTC-1-1	Glu-CTC
89	tRNA-Glu-CTC-2-1	Glu-CTC
90	tRNA-Gly-GCC-3-1	Gly-GCC
