# Supplementary material for: m5U54 tRNA Hypomodification by lack of TRMT2A Drives the Generation of tRNA-Derived Small RNAs
Source: Preprints.org preprint supplement (doi:10.20944/preprints202101.0227.v1), 2021-01-12
Supplement: Supplementary file 2 [file File S2-STables.xlsx]

## Sheet: Table S1_DOWN_DGEs
SYMBOL	ENTREZID
ZNF175	7728
LINP1	108570035
APTR	100505854
SLC20A2	6575
LZIC	84328
ALPP	250
CENPBD1P1	65996
SUMO2	6613
KIAA0825	285600
SCLY	51540
DUBR	344595
CBWD5	220869
LINC00882	100302640
TIAM2	26230
MARVELD2	153562
IMMP1L	196294
ERBB2	2064
ZBTB2	57621
GNAS	2778
MIR4723	100616388
HDX	139324
LOC102723536	102723536
OSTM1-AS1	100287366
LRRC7	57554
SKAP2	8935
CBX6	23466
SMIM11A	54065
GPATCH4	54865
ZNF778	197320
LHFPL3-AS2	723809
UBE3D	90025
RAB21	23011
SUSD4	55061
MAD2L2	10459
FAHD2A	51011
CENPI	2491
RNF223	401934
PLIN2	123
VBP1	7411
HRK	8739
CYTOR	112597
LINC00571	100874188
FAM81A	145773
MGC27382	149047
ZBTB21	49854
MIR4435-2HG	541471
ALS2	57679
ZNF703	80139
DBT	1629
CTNNA2	1496
RAPGEFL1	51195
RSU1	6251
SNHG1	23642
RC3H2	54542
FIGN	55137
ZRSR2	8233
LOC286178	286178
POLR3C	10623
FAM32A	26017
BLCAP	10904
CA5BP1	340591
RHOB	388
KRT42P	284116
GALC	2581
SAR1A	56681
CDC37L1	55664
TMEM59	9528
VAC14	55697
LINC00662	148189
MIR24-1	407012
FBRSL1	57666
LOC102724017	102724017
LUCAT1	100505994
CHCHD5	84269
HTR2C	3358
LOC105375800	105375800
CSNK2A2	1459
PDE10A	10846
TRAPPC10	7109
PCDHB18P	54660
ZBTB26	57684
LINC01503	100506119
ARMCX4	100131755
CDHR3	222256
OXR1	55074
PSG9	5678
CDC23	8697
LOC102725019	102725019
TLE4	7091
PARN	5073
UBE2E3	10477
CNOT4	4850
ERO1A	30001
NKX6-2	84504
MIR29A	407021
TAF8	129685
ACTR3C	653857
KPNA5	3841
SYDE2	84144
PTGR1	22949
LOC284798	284798
OVOL2	58495
RPP38	10557
ADARB2	105
MIR29B2	407025
PIGL	9487
MTMR1	8776
LYPD5	284348
GP2	2813
TUBB6	84617
SLC35E3	55508
PSPC1	55269
TRMT112P6	391358
KMT2E	55904
MREG	55686
PARP9	83666
ZMYM4	9202
MARCH8	220972
ZBTB37	84614
TMEM45A	55076
UBA6-AS1	550112
CABLES1	91768
GFPT1	2673
GPKOW	27238
LOC652276	652276
ERICH1	157697
CDCA5	113130
GTF2H3	2967
BREA2	286076
ZNF493	284443
UBE3A	7337
FAM9B	171483
CYC1	1537
ZNF594	84622
CYB5A	1528
FAM199X	139231
CNEP1R1	255919
CCDC86	79080
FAM104B	90736
DCTPP1	79077
TOP1P2	7152
ZNF461	92283
PROSER2	254427
SCARNA22	677770
TIMM29	90580
HDAC2	3066
BCCIP	56647
MCM9	254394
SH2D3A	10045
LSR	51599
KLF2	10365
ANKRD33B	651746
AURKB	9212
AP1M2	10053
UBA2	10054
ZNF235	9310
CTRL	1506
NIPA2	81614
S1PR2	9294
MAK16	84549
SMG7	9887
UAP1L1	91373
KBTBD8	84541
MARS2	92935
STK32B	55351
IL26	55801
CYTH3	9265
MFHAS1	9258
OXNAD1	92106
NEDD9	4739
MED30	90390
GRK6	2870
MSANTD3	91283
CCNT2	905
CDKN2AIPNL	91368
API5	8539
ATP6V1E2	90423
BRD4	23476
CCDC34	91057
PARD3	56288
XPO6	23214
FAM189B	10712
TRIP12	9320
RSL1D1	26156
AKAP10	11216
TMEM181	57583
CCT8	10694
LINC00942	100292680
MAPKAP1	79109
FAM27E3	100131997
MROH1	727957
PLXDC1	57125
KIF19	124602
ADSL	158
CD177	57126
MRPL47	57129
G3BP1	10146
MAPKAPK5-AS1	51275
OSGIN1	29948
GNA13	10672
RNF2	6045
UPF3B	65109
RCL1	10171
WDR33	55339
MSRB3	253827
APC	324
ZNF160	90338
SBF1P1	100133234
NUDT16P1	152195
ALDOB	229
SENP3	26168
PMF1	11243
GADD45B	4616
MCU	90550
SHF	90525
THAP3	90326
ZCCHC2	54877
TUG1	55000
HUS1B	135458
SLC44A2	57153
LYRM1	57149
PWARSN	347746
RASGRP1	10125
GPD2	2820
XRCC3	7517
ZNF44	51710
ARHGAP20	57569
SIPA1L2	57568
PRELID3A	10650
PAGR1	79447
XPOT	11260
TRMT5	57570
LRRC37A2	474170
ZNF707	286075
ZBTB34	403341
NAMPT	10135
PHTF2	57157
IGF2BP1	10642
SNU13	4809
CARHSP1	23589
DPYD	1806
NIPAL3	57185
BCAP29	55973
MEA1	4201
CLUH	23277
TIPRL	261726
DUSP12	11266
UBE2D3	7323
ANKRD26	22852
THOC5	8563
CDK4	1019
SPINT2	10653
SNORA62	6044
ETFBKMT	254013
ARAP2	116984
NEDD1	121441
NFYA	4800
LOC101927815	101927815
NFKBIB	4793
TMSB4X	7114
PRR4	11272
WIPI2	26100
DDX19B	11269
NR0B1	190
EPC2	26122
FRMD6	122786
ZNF546	339327
NUPR1	26471
ADGRG6	57211
ZBTB8OS	339487
TYMS	7298
MTFR1	9650
SP2-AS1	100506325
PPM1F	9647
CTR9	9646
CDKN2A	1029
FKBP1A	2280
RBM28	55131
HTT	3064
NPAT	4863
RBM18	92400
CTDSP2	10106
CCZ1	51622
GUF1	60558
ZNF227	7770
F2R	2149
ZFAND2A	90637
CUL4A	8451
PDE5A	8654
RUVBL1	8607
EYA3	2140
NF1	4763
CNOT7	29883
HNRNPA2B1	3181
ZWINT	11130
RBMX	27316
PMAIP1	5366
ATMIN	23300
DIP2A-IT1	100862692
USP32	84669
CD300A	11314
GPN1	11321
NPM1	4869
PPA1	5464
NRAS	4893
ERAL1	26284
MAP3K9	4293
ZC3H18	124245
GSE1	23199
TMEM130	222865
ODC1	4953
OCLN	100506658
C6	729
SLC6A15	55117
ANKS1A	23294
CNP	1267
C3	718
CTRC	11330
NVL	4931
OR51G2	81282
EFCAB3	146779
OAZ2	4947
TNNC1	7134
HSPD1	3329
PWP2	5822
SLC6A13	6540
DNAJB6	10049
ZSCAN12	9753
TOP1	7150
OPHN1	4983
RAD23A	5886
TNFRSF11B	4982
OLR1	4973
OMG	4974
OGG1	4968
ARFRP1	10139
BSDC1	55108
ZNF283	284349
MITD1	129531
TRIM16L	147166
PLEKHB2	55041
EIF4E	1977
TPP2	7174
CROCC	9696
PPID	5481
OTUD6B-AS1	100506365
OVGP1	5016
RPS26	6231
E2F5	1875
PSMD5	5711
E2F4	1874
HNRNPU	3192
DPY30	84661
HSPA4	3308
CCDC85C	317762
RPS19BP1	91582
ZNF30	90075
MED9	55090
SUFU	51684
NIF3L1	60491
SI	6476
REG4	83998
EEF1E1	9521
CRYBB2	1415
STEAP3	55240
ZNF501	115560
CYP1A1	1543
NEDD4L	23327
IL6ST	3572
DUSP7	1849
LOC374443	374443
IL1RAP	3556
IL7R	3575
NDUFA12	55967
GEMIN2	8487
MTHFD2L	441024
MTMR11	10903
EDRF1	26098
BAIAP2L1	55971
WDR89	112840
LINC00670	284034
FGG	2266
MED27	9442
PANK2	80025
THBS1	7057
PA2G4	5036
LOC100507599	100507599
ORC2	4999
HIST1H2BB	3018
KCNAB2	8514
TIMM13	26517
CCDC126	90693
TBL2	26608
MISP	126353
CNST	163882
CRYZL1	9946
RPRD1A	55197
GNB1L	54584
TGFB2	7042
KLC3	147700
LINC01571	101927364
DNM1L	10059
RAE1	8480
RPL29	6159
BMP5	653
STAG3	10734
HAT1	8520
GPATCH8	23131
KANSL2	54934
MB21D2	151963
USP2-AS1	100499227
MCAT	27349
EED	8726
PIWIL3	440822
SDC4	6385
ANKRD27	84079
ENAH	55740
ARHGAP19	84986
RNF41	10193
XK	7504
PDCD5	9141
THAP12	5612
CDC14B	8555
POLR2F	5435
SPRED1	161742
ZSCAN32	54925
TJP1	7082
CHCHD3	54927
RXRB	6257
RRP9	9136
RABEP1	9135
IMPAD1	54928
PFN2	5217
LYAR	55646
SYTL5	94122
SLC25A26	115286
PDGFD	80310
ANO6	196527
FGL1	2267
KCNAB3	9196
HOXC13-AS	100874366
MTPN	136319
NEMP1	23306
RBMS3-AS3	100873979
RHOT1	55288
NCK1	4690
COMMD7	149951
CYCSP52	360155
ZEB1-AS1	220930
UNK	85451
PPP1R11	6992
WRN	7486
ZW10	9183
GNGT1	2792
TIGD7	91151
FAM171B	165215
ZNF28	7576
SNX30	401548
PPARG	5468
SLC24A1	9187
SNTB1	6641
NKX3-1	4824
NNMT	4837
DNAJC13	23317
NFYB	4801
SNAP47	116841
ANAPC1	64682
RNF7	9616
CEP104	9731
ABLIM1	3983
PDPK1	5170
ZFAND3	60685
ATF5	22809
BCL6	604
JADE2	23338
ZNF17	7565
CLASP1	23332
ZNF281	23528
INTS6	26512
UCK2	7371
LOC102724096	102724096
FBXO21	23014
LARP1B	55132
LOC101927550	101927550
FERMT3	83706
SBDSP1	155370
TEAD4	7004
PMS2	5395
RIC8A	60626
MIR17HG	407975
PSIP1	11168
PURB	5814
RFXAP	5994
TNPO3	23534
TRIM37	4591
TLL2	7093
SNHG16	100507246
PKP4	8502
GLUD2	2747
GTF3C5	9328
GGCT	79017
RPGR	6103
CENPN	55839
NDUFA8	4702
ZNF138	7697
TMEM242	729515
PDLIM7	9260
PRSS56	646960
NTM-AS1	101929637
AREL1	9870
MAP7D3	79649
SLC6A10P	386757
LOC101928253	101928253
SUMO3	6612
TUBB	203068
RASSF1	11186
YAP1	10413
SLC2A3	6515
SH3RF1	57630
DAZAP1	26528
GDI1	2664
NPRL3	8131
ZFP64	55734
YEATS4	8089
NPR3	4883
MECP2	4204
MTRR	4552
ULK4	54986
ITPK1	3705
POLQ	10721
ALG13	79868
SCNM1	79005
LUZP1	7798
FBXW7	55294
ARL13B	200894
LINC-PINT	378805
ITFG2	55846
B4GALT3	8703
ALDH4A1	8659
PTGES3L-AARSD1	100885850
BTRC	8945
MED8	112950
HAX1	10456
MSI2	124540
TRAF4	9618
RNF14	9604
ITGB1BP1	9270
SLC25A38	54977
NYAP2	57624
WDR4	10785
KIF16B	55614
KLB	152831
SLC25A25	114789
PSMC4	5704
TRIM7	81786
PTPMT1	114971
CLPB	81570
SEC24A	10802
RELB	5971
ARL17B	100506084
PDRG1	81572
CAPZA1	829
ZC3H15	55854
PTPA	5524
NSMCE3	56160
RFT1	91869
SLC16A14	151473
EIF2B2	8892
TRAPPC2L	51693
CCNYL1	151195
SHROOM3	57619
RSC1A1	6248
PDGFC	56034
CHRM2	1129
RP9	6100
VAMP2	6844
TRAM2-AS1	401264
LRFN4	78999
LOC101929709	101929709
DAP3	7818
CSPP1	79848
TMEM126B	55863
DNAJB1	3337
OBSCN	84033
CSRNP2	81566
FNIP2	57600
DSC2	1824
LMAN2L	81562
STARD13	90627
PLA2G4A	5321
COMMD1	150684
ARHGAP17	55114
TFE3	7030
DBR1	51163
EEF1AKMT1	221143
DYNLT3	6990
FABP5	2171
CTNNBL1	56259
ST7	7982
TMUB1	83590
UCK1	83549
PRIM2	5558
DDA1	79016
UPF2	26019
CCDC112	153733
FAM83G	644815
DCP1A	55802
PPM1K	152926
HIST1H2BK	85236
YARS	8565
SMC3	9126
NACC1	112939
EPAS1	2034
CNOT9	9125
TRAF3IP2-AS1	643749
LOC257396	257396
EFTUD2	9343
KHSRP	8570
HDAC8	55869
GPN3	51184
RAB28	9364
TRAPPC6B	122553
SNHG5	387066
SERTAD4	56256
NHP2	55651
ZNF300	91975
AHNAK	79026
RAPGEF2	9693
ZNF655	79027
MLLT10	8028
FOXJ2	55810
YES1	7525
LUZP6	767558
RNF39	80352
TATDN3	128387
GABARAPL1	23710
NUTM2B-AS1	101060691
EXOSC2	23404
EP300	2033
SNORA59B	677882
CD2BP2	10421
SECISBP2	79048
PI4K2A	55361
STAT3	6774
BTBD9	114781
BAG3	9531
BDP1	55814
HSPA4L	22824
CKMT2-AS1	100131067
NFE2L3	9603
PPP2R2D	55844
SVIL-AS1	102724316
GOSR2	9570
CDCA2	157313
ZNF749	388567
ZNF805	390980
SULT1E1	6783
UBN1	29855
NDC80	10403
DNAL1	83544
PAG1	55824
MRPL9	65005
SNORA26	677810
EIF4A1	1973
ITPRIPL2	162073
SCARNA16	677781
HES7	84667
ZNF302	55900
EIF4G2	1982
ELAVL1	1994
TXNL4B	54957
FRS2	10818
MAPRE2	10982
TIPIN	54962
LRRC37B	114659
FAT4	79633
HOMER1	9456
ZNRD1	30834
SNRNP48	154007
NDN	4692
TRIM13	10206
RBBP6	5930
FBXL16	146330
CCNG2	901
LOC100505841	100505841
KIF9-AS1	285352
AQP11	282679
RNASEH1-AS1	100506054
SLC9A6	10479
HSPA1A	3303
HRAS	3265
ILKAP	80895
AGAP3	116988
PLEKHA8	84725
CETN3	1070
CRNKL1	51340
HSPA1B	3304
HSP90AA1	3320
H2AFJ	55766
NET1	10276
FEZ2	9637
CTAGE7P	119437
FMN1	342184
LNX2	222484
RAI14	26064
MYBL2	4605
DARS2	55157
MRPS30	10884
ARMC1	55156
ANKRD30B	374860
BNIP2	663
TNFRSF12A	51330
BCS1L	617
PRSS53	339105
CLPTM1L	81037
PTDSS2	81490
SLC25A32	81034
DMKN	93099
ERF	2077
SAMD4A	23034
TBX5-AS1	255480
TMEM38B	55151
CRB1	23418
CAMTA1	23261
MEX3C	51320
EMD	2010
RASA4B	100271927
NBN	4683
VOPP1	81552
SGPP1	81537
KRTAP9-7	100505724
RAB8A	4218
COQ3	51805
XAGE2	9502
SLC2A14	144195
ZNF329	79673
TROAP	10024
THSD7B	80731
F5	2153
PHKG2	5261
MOSPD1	56180
KLLN	100144748
ABCA9-AS1	104355297
MTHFS	10588
SSH2	85464
NCL	4691
SRXN1	140809
TRIM59	286827
FLJ36000	284124
ARHGDIA	396
AFMID	125061
NUP98	4928
SSH1	54434
ADAMTSL1	92949
EIF4E2	9470
USP18	11274
KLHL7	55975
LINC00472	79940
OR2D3	120775
LTN1	26046
FAM169A	26049
BCAS2	10286
ZNF709	163051
CCT2	10576
CTAGE15	441294
FOXP4-AS1	101060264
ATG13	9776
MRPL28	10573
CCT7	10574
LYPD6B	130576
VCX2	51480
AKAP7	9465
EDARADD	128178
TTC36	143941
LINC01605	100507420
PDE12	201626
RTKN2	219790
LOXL3	84695
GATC	283459
SSC4D	136853
NSMF	26012
ZZZ3	26009
PTCH1	5727
RPAP3	79657
LIMA1	51474
POLR3F	10621
ZNF433	163059
FTL	2512
CRYM-AS1	400508
MTMR2	8898
ZNF430	80264
ASZ1	136991
TMEM216	51259
PTP4A3	11156
HOXC13	3229
DST	667
DPH3P1	100132911
PARP8	79668
NFATC2	4773
DDX47	51202
GPR107	57720
SCAMP4	113178
BTK	695
ERI1	90459
PUSL1	126789
FKBP3	2287
FKBP4	2288
U2AF1L4	199746
DNAH14	127602
CNKSR3	154043
TOX	9760
RCN2	5955
ATG3	64422
MCM3AP-AS1	114044
SLC39A10	57181
TXNRD2	10587
ATP6V0E2-AS1	401431
KLRG1	10219
DHRS7B	25979
POLR1E	64425
ARL8B	55207
FAM27C	100132948
ZNF532	55205
HINFP	25988
MEST	4232
RIN2	54453
ZNF26	7574
KCTD5	54442
NUP205	23165
MSH6	2956
PSAT1	29968
AP3S2	10239
DENND5B	160518
FAM27E2	100289124
ZFAND4	93550
UPF1	5976
HNRNPR	10236
PCNX4	64430
RFC3	5983
AK4	205
TRMT13	54482
C2CD3	26005
BOD1L1	259282
LOC100129034	100129034
AGXT2	64902
NFKB1	4790
DYNC2LI1	51626
MRPL10	124995
TCOF1	6949
MED22	6837
CLIP3	25999
GTPBP3	84705
ALMS1	7840
MKI67	4288
CLDN10-AS1	100874194
PDP1	54704
TREM2	54209
ACVR1B	91
TBC1D5	9779
FAM91A1	157769
ZNF100	163227
HK2	3099
RARS2	57038
NKAIN2	154215
RGS16	6004
TMEM265	100862671
MRPL52	122704
SETDB2	83852
UTRN	7402
RPF2	84154
HPRT1	3251
HSD11B2	3291
MAST2	23139
HELQ	113510
DQX1	165545
PML	5371
TERF2IP	54386
SLC38A2	54407
SERTAD2	9792
BMS1	9790
RNF4	6047
ATF2	1386
SNX11	29916
ARID5B	84159
TGIF2	60436
SPRY2	10253
RNASEH1	246243
MPP5	64398
MMACHC	25974
MPC1	51660
ZNF79	7633
KLHL25	64410
TMLHE	55217
ZNF717	100131827
FANCI	55215
DDTL	100037417
POGZ	23126
GOLGA2P7	388152
PLAC8	51316
TAF2	6873
REXO4	57109
IL32	9235
CYCS	54205
FAM230B	642633
THUMPD3-AS1	440944
TUBA8	51807
DNAAF2	55172
PDE7B	27115
MIS18A	54069
GCFC2	6936
KLHL11	55175
UBA3	9039
TOMM40L	84134
MRPS10	55173
WBP4	11193
CHN1	1123
CHML	1122
SORT1	6272
PQBP1	10084
INTS12	57117
UTP15	84135
PAQR3	152559
GARS	2617
GAPDH	2597
TBCC	6903
GAS1	2619
FAM13B	51306
FAM53C	51307
MRPS18A	55168
LINC01311	100652736
MSL2	55167
PCGF1	84759
AKR1C4	1109
MIATNB	102724827
MAP3K14	9020
RPS6KB2	6199
ZNF585B	92285
PITHD1	57095
ARL6	84100
S100A10	6281
LINC01116	375295
MPV17L2	84769
GABPA	2551
GABPB1	2553
P2RY13	53829
MMP12	4321
ZNF607	84775
ZFP62	643836
PEMT	10400
KCTD10	83892
CHCHD7	79145
DDX39A	10212
EIF1	10209
SCN7A	6332
ATXN2	6311
ANKRD23	200539
SBF1	6305
PPP1R14B	26472
GPRC5A	9052
CCR7	1236
TSR2	90121
BTAF1	9044
CLCN4	1183
RIF1	55183
DEF8	54849
IL6	3569
WNT16	51384
KLHL5	51088
SERTAD4-AS1	574036
GSK3B	2932
HIST1H3I	8354
SETD5	55209
RAD51	5888
HIST1H3C	8352
LAMB2P1	22973
UBE2D4	51619
RAD17	5884
ZFPM2-AS1	102723356
RCOR2	283248
RABIF	5877
CRLF3	51379
STAT5A	6776
OARD1	221443
VSTM1	284415
SKA3	221150
CRELD1	78987
PACRGL	133015
SCAMP1-AS1	728769
FBXL19-AS1	283932
GGPS1	9453
TMEM161B-AS1	100505894
HMGB3	3149
CNTF	1270
ZNF174	7727
LINC00113	54088
ALDH18A1	5832
CHODL-AS1	54075
RPAIN	84268
FBXW2	26190
GATA2-AS1	101927167
PSG8	440533
GNAQ	2776
RBM4	5936
CITED2	10370
BBX	56987
PSMC3IP	29893
TFAP2A	7020
FAM225A	286333
TRA2A	29896
SETD3	84193
FBXO22	26263
LOC100233156	100233156
BCL2	596
MRPL44	65080
UAP1	6675
NABP1	64859
CCNK	8812
GSR	2936
RASA1	5921
LOC389906	389906
DDX11-AS1	100506660
ARID4A	5926
ZWILCH	55055
SMG9	56006
RASGRF1	5923
HIST1H2BI	8346
RANBP1	5902
ATP6V1D	51382
FAM225B	100128385
HIST1H2BM	8342
ADIPOR1	51094
ZNF341-AS1	101929746
FBXO8	26269
FOXD3	27022
DCTD	1635
DUSP4	1846
ECT2	1894
CCDC18-AS1	100131564
METAP2	10988
TBX2-AS1	103689912
CCNI	10983
SORL1	6653
CHAC1	79094
ELP3	55140
PDSS1	23590
WDR74	54663
GSPT2	23708
SMUG1	23583
LOC100130950	100130950
MZT1	440145
HAUS2	55142
AURKA	6790
KLHDC8B	200942
SMIM7	79086
PSMD6	9861
SLA2	84174
WDR77	79084
GET4	51608
ANKRD17	26057
CEP170	9859
TNIP1	10318
METTL22	79091
CEBPB-AS1	101927559
RHOBTB2	23221
LHX4	89884
FBXO28	23219
FGFR2	2263
EBNA1BP2	10969
CDC25A	993
CTAGE11P	647288
CDK20	23552
ZNF180	7733
VIPR1	7433
ZFP69B	65243
TAF5L	27097
LINC01138	388685
FZD6	8323
MIR924HG	647946
BRD7	29117
ZNF25	219749
CDC25C	995
SMYD5	10322
SAP30BP	29115
AXIN1	8312
NUTM2A-AS1	728190
DDX31	64794
TRIML2	205860
LIAS	11019
TTLL12	23170
SNRNP27	11017
STKLD1	169436
TGM2	7052
NAA30	122830
VPS4A	27183
LIX1L	128077
MRPS17	51373
ZBED4	9889
ASB9	140462
PPP2R5C	5527
UMODL1	89766
SPATA2	9825
RAB35	11021
THAP4	51078
CPNE6	9362
LURAP1L-AS1	101929467
RFTN1	23180
NT5C3A	51251
THAP9-AS1	100499177
SUMO1	7341
HAO2	51179
SARS	6301
DROSHA	29102
MMS22L	253714
PRELID1	27166
SETD9	133383
ADORA2A	135
TMEM67	91147
FBXL13	222235
LOC102724659	102724659
AMN1	196394
ADNP	23394
ARHGAP5	394
LINC00641	283624
TLK2	11011
MRPL2	51069
SNAPC5	10302
APIP	51074
MIR181A2HG	100379345
MEMO1	51072
CLPP	8192
NAA16	79612
TANGO6	79613
NADK	65220
SACS	26278
FLRT2	23768
MTMR6	9107
ZNRF3	84133
SFMBT1	51460
HEG1	57493
ARID1B	57492
ARID5A	10865
UPB1	51733
FAM227B	196951
KIDINS220	57498
WDR26	80232
VPS50	55610
HMGA1	3159
MORF4L2-AS1	340544
LINC00629	100506757
SULT4A1	25830
CHD7	55636
PIAS2	9063
MAT2B	27430
GNAS-AS1	149775
DENND1B	163486
KRBOX4	55634
FJX1	24147
IPO11	51194
TTC34	100287898
ATXN7L1	222255
SFMBT2	57713
ADNP-AS1	101927631
SAP130	79595
ZSCAN21	7589
PROSER1	80209
TEAD2	8463
MRPL39	54148
GK	2710
GBX2	2637
CLDN15	24146
POLR3K	51728
DLEU2L	79469
SERINC1	57515
FBXO25	26260
STIP1	10963
AP1AR	55435
PISD	23761
XPO5	57510
CDC42SE1	56882
GPR149	344758
UNKL	64718
SERINC3	10955
BAIAP2	10458
AKR1C1	1645
EPB41L5	57669
HSCB	150274
UCHL3	7347
NAA50	80218
LOC102724238	102724238
DHX15	1665
TUBA3C	7278
DHX9	1660
TUBA4A	7277
LINS1	55180
DHFRP3	1720
ATF3	467
MDFIC	29969
PNPLA4	8228
RAB3IP	117177
MCM7	4176
MTMR10	54893
PPP1R15A	23645
HERC5	51191
SPTLC1	10558
ARFGEF2	10564
CORO1C	23603
ZNF608	57507
ARFGEF1	10565
PABPN1	8106
BTG3	10950
NSUN2	54888
CBX1	10951
BAG1	573
SF3A3	10946
DKC1	1736
GCC1	79571
SNORA11C	100124540
SNORA11D	100124541
VLDLR-AS1	401491
CHIC2	26511
ZNF674	641339
SORBS1	10580
RUBCNL	80183
CGN	57530
MCF2L-AS1	100289410
SNORA11B	100124539
SNORA38B	100124536
FAM45A	404636
RERE	473
PPP6C	5537
LINC00667	339290
ANKRD1	27063
DCAF16	54876
CUL4B	8450
PANK3	79646
DOC2A	8448
RPS4Y2	140032
CUL2	8453
UBE3B	89910
GULP1	51454
TJP2	9414
RPTOR	57521
DDX10	1662
LRP1B	53353
TTC27	55622
PRRC2A	7916
AHSA1	10598
NOCT	25819
WDFY3-AS2	404201
QRICH1	54870
TCP1	6950
LINC01278	92249
SAA2	6289
HCCS	3052
CSNK2B	1460
CCDC121	79635
FANCC	2176
CSTF2	1478
NRBF2	29982
DNAJB2	3300
OSBPL9	114883
RBM38	55544
CLDN12	9069
TMEM104	54868
TRMT1	55621
CHORDC1	26973
GPR160	26996
REPIN1	29803
ERVMER34-1	100288413
GK5	256356
OR10W1	81341
STX7	8417
SPACA6	147650
RPL32	6161
ZSCAN2	54993
TERF1	7013
CCNJL	79616
H1F0	3005
TXNDC16	57544
GTF2H1	2965
ATXN8OS	6315
AATF	26574
DDAH1	23576
NMI	9111
MPST	4357
MEF2C	4208
ME2	4200
MDM2	4193
ZC3H12A	80149
DIP2B	57609
THOC7	80145
TSIX	9383
SNX15	29907
ZNF740	283337
FAM216A	29902
KATNA1	11104
KRR1	11103
TIMM23	100287932
RBM14	10432
PLCB4	5332
BRS3	680
EMG1	10436
DUSP19	142679
PPM1L	151742
GFM1	85476
PMF1-BGLAP	100527963
TET2	54790
TSTD2	158427
SEPSECS	51091
TIMM17A	10440
UNC5D	137970
RPF1	80135
EXOC8	149371
RTN4IP1	84816
RAD54B	25788
AP4S1	11154
RSF1	51773
KLC2	64837
OGFRP1	388906
PEG10	23089
SORCS3-AS1	100505890
VHLL	391104
OTUD6B	51633
AGFG1	3267
SLC25A39	51629
TUBGCP3	10426
CD300E	342510
POGK	57645
EPDR1	54749
CDC37	11140
SBF2-AS1	283104
CDV3	55573
KCTD21-AS1	100289388
SPRR2A	6700
VPS9D1-AS1	100128881
ANP32A	8125
NDUFAF1	51103
PPM1B	5495
TBX2	6909
GPAT3	84803
BMPR1B	658
INF2	64423
PAN3	255967
LGSN	51557
TTC21B	79809
SPTB	6710
MKLN1	4289
KIAA1147	57189
GART	2618
MANBAL	63905
SF3B6	51639
EXOSC3	51010
VPS54	51542
ZNF274	10782
DUSP13	51207
TMED5	50999
SNORA48	652965
TFPT	29844
SNORA5A	654319
ASXL1	171023
FAM192A	80011
MLF1	4291
SNORA71B	26776
HPS4	89781
SNORA71A	26777
TMEM156	80008
SNORA67	26781
KRAS	3845
SBDS	51119
ZNF83	55769
DCLRE1C	64421
UTP11	51118
MEF2B	100271849
PPIEL	728448
UFM1	51569
CDK12	51755
ZNF765	91661
ADRM1	11047
VTI1B	10490
LRCH3	84859
FOXRED2	80020
SNORA13	654322
LOC101928076	101928076
NAA25	80018
MAFG	4097
GIT2	9815
SNORA75	654321
KMT5B	51111
EPCAM	4072
MAP2K3	5606
MAGOH	4116
PDS5A	23244
SLC25A17	10478
PAM16	51025
MAP2	4133
HSF2BP	11077
ICAM1	3383
ETV4	2118
CAB39L	81617
LOC642366	642366
ZNF695	57116
CAP2	10486
SETD4	54093
TOB2P1	222699
CHEK1	1111
PRPS1L1	221823
TTC23	64927
CCNH	902
ADTRP	84830
SNORA9	677798
MRPS34	65993
SNORA2A	677793
ANKRD10	55608
LINC00367	101930748
COPZ1	22818
IFRD1	3475
ITGB3	3690
MAX	4149
SURF2	6835
DUSP14	11072
ICA1L	130026
ZBED8	63920
CNTRL	11064
KATNBL1	79768
ZNF776	284309
NBEAL1	65065
EMC9	51016
CIDEC	63924
TIMM44	10469
PHF5A	84844
CDK3	1018
FXR1	8087
GAN	8139
HNRNPKP3	399881
TMEM126A	84233
FBXO17	115290
EWSAT1	283673
SEH1L	81929
LARP4	113251
SEC14L1P1	729799
MGC27345	157247
ZNF473	25888
GREM1	26585
CDS1	1040
PTPRR	5801
COX20	116228
STYXL1	51657
TULP4	56995
CDK8	1024
SPATA3-AS1	348761
LIFR	3977
EPM2A	7957
LINC00944	387895
ZDHHC18	84243
GRHL2	79977
HINT3	135114
LETMD1	25875
GOLT1B	51026
NRG4	145957
KRTAP21-2	337978
RHBDD1	84236
CHD2	1106
MAP3K4	4216
CHKA	1119
FAM204A	63877
MBD2	8932
ABHD4	63874
BGLAP	632
RSPO3	84870
GLUD1	2746
PDAP1	11333
ANAPC10	10393
ARRDC1-AS1	85026
N4BP2L2	10443
PRDX3	10935
PADI1	29943
EIF2S2	8894
EIF2B5	8893
MED10	84246
AP3S1	1176
CLCN6	1185
PTPN2	5771
FLJ43315	644316
GFER	2671
AIFM2	84883
RPUSD4	84881
MTHFD1L	25902
RPL26L1	51121
GINS2	51659
MRRF	92399
NFYC	4802
CLNS1A	1207
TAF4B	6875
DCUN1D5	84259
FLYWCH1	84256
LNP1	348801
NOB1	28987
WWTR1	25937
NTMT1	28989
DTD1	92675
GATA6	2627
NCAPG	64151
MDK	4192
TAS2R42	353164
PSMC1	5700
RBM24	221662
RNF10	9921
FAM20B	9917
FANCA	2175
NOL11	25926
PARL	55486
TPM1	7168
PRKACB	5567
GAS5	60674
KIF2A	3796
PRDM2	7799
FER	2241
JADE1	79960
ETS1	2113
CCNA1	8900
ETS2	2114
GYG2	8908
PSMD11	5717
PSMD12	5718
BID	637
PUM3	9933
ATXN7L3	56970
PSMD8	5714
ZBTB5	9925
SNORA63	6043
FAHD1	81889
ALDH9A1	223
AZIN1	51582
MUC1	4582
ELK1	2002
MLLT1	4298
SLC25A19	60386
LOC101927151	101927151
EGFR	1956
PNKD	25953
TMEM189	387521
MLLT6	4302
CEP44	80817
MRPL13	28998
SUPT7L	9913
DNASE1	1773
EHD4	30844
ALAS1	211
ATL2	64225
ALDH1B1	219
FUBP3	8939
METTL21EP	121952
DENND4B	9909
FAM160A1	729830
TTC28-AS1	284900
LINC01331	104310351
ZBTB1	22890
SLC25A33	84275
KCNK2	3776
ZBTB43	23099
USF3	205717
PFKP	5214
TMEM206	55248
DHFR	1719
RCOR3	55758
CACYBP	27101
ZNF165	7718
PPP3CC	5533
HOXA2	3199
TRIM39	56658
HIVEP2	3097
REM1	28954
SACM1L	22908
NOP10	55505
MRPS28	28957
SPAST	6683
TCHP	84260
CRKL	1399
FOXJ3	22887
ZNF143	7702
HCG18	414777
SUGT1P1	441394
CAMSAP2	23271
ENTPD3-AS1	285266
ZNF134	7693
KTN1-AS1	100129075
EIF3C	8663
EIF4EBP2	1979
EIF4EBP1	1978
PSMB6	5694
SNORA57	692158
CNOT6	57472
PSMB3	5691
PSMB2	5690
NSD1	64324
WDR83	84292
MTURN	222166
SEPSECS-AS1	285540
STAM	8027
SLC39A1	27173
CHIT1	1118
ILF2	3608
ILF3	3609
ANO2	57101
CDCP1	64866
CMAS	55907
BIN3	55909
PSMA3	5684
DCAF5	8816
ING5	84289
AKAP12	9590
HESX1	8820
SMIM13	221710
PSG11	5680
BTBD10	84280
SNORD123	100113384
ALMS1P1	200420
ZNF713	349075
TMEM79	84283
ZNF202	7753
HOXC6	3223
SETDB1	9869
PSMA5	5686
PSMA6	5687
HUS1	3364
SUGT1	10910
ANAPC15	25906
NUDT16	131870
OSMR	9180
TCERG1	10915
GADD45G	10912
LMTK2	22853
NGLY1	55768
BEND6	221336
MCOLN3	55283
SNHG15	285958
DUS3L	56931
QRSL1	55278
MALT1	10892
CWF19L1	55280
WDR3	10885
SOCS2	8835
GMPS	8833
CMSS1	84319
LAP3	51056
LSM12	124801
R3HCC1L	27291
CHRM3	1131
ACBD6	84320
NUDT13	25961
SPRTN	83932
UQCC2	84300
RNF44	22838
KAT2B	8850
KIAA1324L	222223
NUDT16L1	84309
NXT2	55916
ERBIN	55914
TC2N	123036
TARSL2	123283
MIAT	440823
ELP5	23587
COMT	1312
TMEM101	84336
HYPM	25763
SLIRP	81892
TMEM191B	728229
MAP2K1	5604
MRPL42	28977
KIF23	9493
TLR4	7099
CENPV	201161
KIF18A	81930
GRASP	160622
KDF1	126695
ABCF1	23
POLR3H	171568
DNAJC14	85406
TMEM89	440955
CMC2	56942
DPH3	285381
ZNF573	126231
PRKCI	5584
SURF6	6838
DDRGK1	65992
ZNF285	26974
IKBKE	9641
VCL	7414
BEX2	84707
ITGB1BP2	26548
COX19	90639
MFF	56947
SEPHS2	22928
HOTAIRM1	100506311
SEPHS1	22929
RHOQ	23433
TRMT61A	115708
BRI3	25798
SLC35A3	23443
PEA15	8682
PSPH	5723
DMD	1756
ZFAND1	79752
S100A14	57402
HDAC1	3065
VWA8	23078
PTEN	5728
PROC	5624
PEX5	5830
PTS	5805
NGRN	51335
TADA2A	6871
RABGGTB	5876
BCL2L11	10018
RAB30	27314
NCAPH2	29781
PEX14	5195
PFKFB3	5209
BBS10	79738
PXDC1	221749
ASNS	440
ATF4	468
GJB2	2706
TAF1A	9015
PON2	5445
PKP2	5318
PPDPF	79144
RPRM	56475
HACL1	26061
ZNF638	27332
LOC728392	728392
FAAP20	199990
MAGI2-AS3	100505881
MSRB2	22921
USP53	54532
SNAPC3	6619
ZNF286A	57335
MARS	4141
CRYBB2P1	1416
ARNT	405
RAVER1	125950
SLC1A3	6507
TPM3	7170
SCO1	6341
ASNSD1	54529
CBX8	57332
CRYZ	1429
IRF7	3665
ANKS3	124401
KLHL18	23276
ZNF518A	9849
MTRF1L	54516
SLC35A2	7355
GPT2	84706
MKRN3	7681
SMS	6611
TBC1D13	54662
SNRPA	6626
BRMS1	25855
SMG6	23293
NOL9	79707
KIF27	55582
PRKRIP1	79706
TBL1X	6907
HNRNPH3	3189
ZFP36	7538
FLJ42627	645644
IPO4	79711
TMEM9	252839
ZDHHC3	51304
TAF11	6882
ZNF816	125893
NARS	4677
YWHAH	7533
RNF115	27246
ZFAS1	441951
TRIM62	55223
XPO1	7514
CSDC2	27254
MRPL49	740
RAVER2	55225
HMGB3P1	128872
MRPL22	29093
ANKRD61	100310846
ACTN4	81
DOCK7	85440
DNLZ	728489
MRAS	22808
ANO7	50636
PMS2P1	5379
LINC00909	400657
BCL2L2	599
KIF5C	3800
KIF5B	3799
USP40	55230
SMU1	55234
CDKN2B	1030
MOB1A	55233
TNFRSF21	27242
AMZ1	155185
RUNX1	861
NARS2	79731
SLC1A5	6510
RUNX3	864
SRSF4	6429
TSC22D3	1831
VEZT	55591
POLR1B	84172
LPIN1	23175
SLC6A8	6535
PLEKHA5	54477
NOL10	79954
CRCP	27297
ZNF45	7596
DDIT3	1649
ZNF74	7625
NUP133	55746
ZNF544	27300
E2F8	79733
CIPC	85457
CTTNBP2	83992
TBC1D17	79735
CALML4	91860
PLS3-AS1	101927352
LINC01186	101927574
SNHG11	128439
TRIM44	54765
TMEM147-AS1	100506469
ANKHD1	54882
RBBP4	5928
RGS4	5999
AAGAB	79719
REST	5978
FUS	2521
BASP1P1	646201
NGDN	25983
ZNF322	79692
ZFY	7544
KHDC1	80759
ZFAND6	54469
DIMT1	27292
ZNF35	7584
NEIL3	55247
SLC25A51	92014
STAM-AS1	102723166
HAUS8	93323
AUH	549
IMP4	92856
DYNC1LI1	51143
SNORA80B	100302743
LSM14B	149986
USB1	79650
NSFL1C	55968
TEKT4	150483
PPME1	51400
PRKD2	25865
TSC1	7248
ZCCHC10	54819
MRM1	79922
TMEM138	51524
ASB1	51665
ANKRD39	51239
GATAD2A	54815
CDK16	5127
SH3BGR	6450
COQ7	10229
FAM136A	84908
AP4E1	23431
NEXN-AS1	374987
RAB10	10890
NHLRC2	374354
SRRM5	100170229
PHF20L1	51105
APOBEC3B	9582
UROD	7389
DTL	51514
PLEK2	26499
ERCC6L	54821
FOXD2-AS1	84793
YARS2	51067
UTP4	84916
MID1	4281
OTUB1	55611
HSP90AB1	3326
ALG10	84920
TNPO1	3842
IARS	3376
KCTD3	51133
CLEC2D	29121
KIF22	3835
RLIM	51132
KCTD9	54793
RTEL1	51750
IL15RA	3601
AK2	204
SWI5	375757
LINC00921	283876
SCARNA18	677765
DUS4L	11062
PRR5L	79899
KPNA4	3840
LOC102723385	102723385
CYBB	1536
PPP1R9A	55607
TPM3P9	147804
PRDM4	11108
ZNF586	54807
TFAP2A-AS1	100130275
RBMS1	5937
SCFD1	23256
ANP32D	23519
ZFR	51663
ANP32C	23520
ATAD5	79915
NSMCE4A	54780
GLRX5	51218
UBQLN1	29979
MRTO4	51154
RBM14-RBM4	100526737
ALPK2	115701
KCNK1	3775
DLGAP1-AS2	84777
CGNL1	84952
PRPF38A	84950
GOLGA7	51125
ATP6V0E2	155066
CCNC	892
LOC389641	389641
TRMT112	51504
SAA1	6288
NFIB	4781
TUSC8	400128
CCDC152	100129792
ALMS1-IT1	100874291
TRPC4	7223
KPNB1	3837
ABL2	27
AJUBA	84962
POLR2H	5437
TMPPE	643853
NFE4	58160
GMFB	2764
FBXL20	84961
TGS1	96764
ARL5B	221079
LOC654841	654841
ALPI	248
GRB14	2888
CSNK1A1L	122011
RBP7	116362
MAPK9	5601
NOL7	51406
HDGF	3068
GTF2A2	2958
RPS6KA2-IT1	100874353
NRG1	3084
FOXA1	3169
BORA	79866
RP1	6101
FAM185A	222234
LSM10	84967
PNMA6A	84968
OTUD5	55593
ALG2	85365
LEAP2	116842
FANCD2	2177
MRPL30	51263
ZNF404	342908
PRKAB1	5564
ACVR1	90
BHLHB9	80823
ACVR2B	93
NFKB2	4791
LINC00842	643650
PRKCH	5583
CPSF7	79869
ERAP1	51752
EYA4	2070
SAMD8	142891
SGTA	6449
ENOPH1	58478
SPECC1L	23384
NUS1	116150
STARD6	147323
NUDCD3	23386
PRKAA1	5562
USP10	9100
CLASP2	23122
MORN4	118812
PPAT	5471
ITGAV	3685
FEM1A	55527
HEIH	100859930
SRSF10	10772
PNO1	56902
TMEM167B	56900
FANCM	57697
SRSF3	6428
LETM2	137994
[truncated: 494 more rows]

## Sheet: Table S2_UP_DGEs
SYMBOL	ENTREZ ID
LOC100287704	100287704
ITPKB	3707
MIR6741	102466270
SAMD9L	219285
LOC102723968	102723968
TTF2	8458
LINC01122	400955
SCUBE1	80274
CCDC57	284001
SH2D6	284948
MIR4329	100423009
ZNF329	79673
TAZ	6901
LOC101927851	101927851
ACYP2	98
PLCH2	9651
SPATA4	132851
LOC105375266	105375266
LOC105377213	105377213
ALX4	60529
ZNF396	252884
CNTNAP3B	728577
SUSD4	55061
ANKRD11	29123
LRRC45	201255
PPA2	27068
ZC3H13	23091
LINC00887	100131551
PPDPF	79144
PDE1C	5137
LOC105375624	105375624
CTTNBP2NL	55917
MED28	80306
YIPF4	84272
LOC102724373	102724373
PTRH1	138428
BCAS4	55653
TAS1R3	83756
RMST	196475
GOLGA8N	643699
LOC102723493	102723493
STON1	11037
GOLGA8R	101059918
MIR4651	100616270
RANBP17	64901
PRMT7	54496
SRGAP3	9901
LOC105371899	105371899
OTUD6A	139562
IGFBP7	3490
TAPBP	6892
CIRBP	1153
TIGD2	166815
DYNLL2	140735
LOC105369971	105369971
C1QL1	10882
HES2	54626
EWSAT1	283673
TMEM200C	645369
ERO1B	56605
STXBP4	252983
WDR45	11152
LOC284379	284379
MSN	4478
FAM229B	619208
NOL4L	140688
CYB5R4	51167
ZFAT	57623
LOC101928168	101928168
FZD10-AS1	440119
TXNDC11	51061
VSIG10	54621
TMEM255B	348013
DTWD1	56986
LOC105375968	105375968
LOC105369486	105369486
COMMD9	29099
PDZD4	57595
UBE3A	7337
NCF1B	654816
ARHGAP21	57584
COL5A1	1289
RPL10	6134
OSBPL2	9885
NUMBL	9253
HOXA6	3203
SORD	6652
TJP2	9414
DNASE1L1	1774
ANKRD36C	400986
RABL2A	11159
TBCD	6904
ATPAF1	64756
TTLL8	164714
LOC105375451	105375451
ND4L	4539
MIR365B	100126356
CCDC88B	283234
CGREF1	10669
LDLRAD3	143458
LINC01629	105370578
LOC100505664	100505664
ARPC5	10092
ABCB9	23457
IKBKB	3551
BTN2A3P	54718
EPB42	2038
ARIH1	25820
LINC00958	100506305
TMTC1	83857
MAPK8IP2	23542
ZDHHC11B	653082
FGF11	2256
RNF207	388591
LINC01405	100131138
CFD	1675
TRIQK	286144
GNPTG	84572
PCED1B	91523
DCN	1634
ADAMTS4	9507
IL36B	27177
FAM43B	163933
QPRT	23475
LOC153684	153684
NPTXR	23467
ZNF467	168544
PIGQ	9091
GSTA4	2941
PIGK	10026
TMSB4Y	9087
PDCD4	27250
CPZ	8532
NFATC3	4775
MACROD2	140733
SH2D2A	9047
SCARNA17	677769
CDKN1A	1026
MAMLD1	10046
SLC28A1	9154
NAAA	27163
IGSF1	3547
PRR25	388199
REEP6	92840
ADAMTSL2	9719
GABBR2	9568
TIRAP	114609
OGDH	4967
SNORD116-19	727708
TBX1	6899
BICDL1	92558
CCDC74B	91409
ATP6V1G2	534
MAFB	9935
SP6	80320
RORC	6097
PARD6G	84552
FAXC	84553
SLC12A7	10723
SIM2	6493
PCYOX1	51449
WNT7B	7477
STEAP1B	256227
KRT19P2	160313
CCT6B	10693
ARPC4-TTLL3	100526693
CBX7	23492
RIBC2	26150
ALDH3B1	221
SGCA	6442
ADA	100
EBI3	10148
CCM2L	140706
GALNT6	11226
CSPG5	10675
WDFY1	57590
RIMBP3	85376
ARHGEF19	128272
FARP1	10160
DUSP10	11221
GLB1L	79411
FXYD3	5349
ZBED2	79413
ASIC1	41
NXPH4	11247
CCNI2	645121
LINC00908	284276
CREB3L4	148327
CA6	765
HIVEP3	59269
SMIM5	643008
LOC728975	728975
TBC1D8B	54885
SREK1IP1	285672
TENM2	57451
TMEM159	57146
BHLHE23	128408
TP53I13	90313
SPATA25	128497
LOC101928069	101928069
PPP1R3G	648791
RPPH1	85495
FAM95B1	100133036
SCARA5	286133
LOC101929340	101929340
TMEM63C	57156
LINC00635	151658
FAM135A	57579
GPX7	2882
CASC15	401237
AMT	275
TNFRSF1B	7133
PXMP4	11264
TCN1	6947
CCNE2	9134
NAV1	89796
HLA-DMB	3109
PYDC1	260434
NPHS2	7827
PRUNE2	158471
SLC47A2	146802
CAPN3	825
SCIN	85477
NID1	4811
PYGO1	26108
ANXA8L1	728113
TWIST1	7291
IPO9	55705
LOC100506124	100506124
UGT1A6	54578
GGT1	2678
CETP	1071
NKD2	85409
ZNF592	9640
SSC5D	284297
CATSPER2	117155
CES4A	283848
FBLN1	2192
CCDC190	339512
HERC3	8916
ADGRB2	576
INAFM1	255783
TUBGCP6	85378
MGRN1	23295
CYLD	1540
TNFSF11	8600
EVX1	2128
LOC388780	388780
EHBP1	23301
NPTX1	4884
NT5E	4907
PTPRU	10076
MGP	4256
DNAAF3	352909
ACR	49
GALNT1	2589
USH1C	10083
FN1	2335
LOC101928152	101928152
EPHX2	2053
DMTN	2039
SERPING1	710
WDR60	55112
ADAMTS13	11093
OAS1	4938
RASSF4	83937
CLN3	1201
TMEM198	130612
TNNC2	7125
GPATCH2	55105
LINC01603	100505739
SYNPO	11346
TPCN2	219931
DNER	92737
RNF13	11342
EHHADH	1962
DGAT2	84649
TNC	3371
EDEM1	9695
CAST	831
IFI27L2	83982
P2RX1	5023
P4HA3	283208
PTH2R	5746
HYAL2	8692
HPD	3242
FECH	2235
IGFBP6	3489
HSPB9	94086
PDE4DIP	9659
MLXIPL	51085
ADAMTS16	170690
PPARA	5465
SCNN1A	6337
OSBPL7	114881
COL3A1	1281
ABTB1	80325
COL4A3	1285
NFKBIL1	4795
P2RY6	5031
IDH2	3418
SDC3	9672
SULF2	55959
TMEM80	283232
TBC1D2	55357
PCBP2	5094
SRD5A1	6715
MICALL2	79778
LAMP2	3920
PALM	5064
PDE4B	5142
INSL4	3641
TWISTNB	221830
TIMP2	7077
TIMP1	7076
PROM2	150696
LOC100506271	100506271
GOLGA8M	653720
FAM57B	83723
CNTNAP1	8506
PCM1	5108
ADGRV1	84059
IGFL2	147920
GBGT1	26301
TP53TG3C	653550
SORBS2	8470
SYNGR4	23546
GINS1	9837
TMSB15A	11013
GALNS	2588
KCNU1	157855
ZNF623	9831
STEAP1	26872
MEGF8	1954
SPON2	10417
SEMA6B	10501
IFITM1	8519
ART5	116969
NEFH	4744
LHFPL3-AS2	723809
RHBDL2	54933
TM7SF2	7108
ARMC2	84071
MYCBPAP	84073
TMEM64	169200
TMOD1	7111
PTGS1	5742
SPATA17	128153
PARP9	83666
SHC2	25759
SLC17A5	26503
TEX30	93081
TIMP4	7079
ICAM5	7087
CSH2	1443
TLE2	7089
INE1	8552
FHL2	2274
DCLK1	9201
LINC00592	283404
TCF7	6932
TSC2	7249
MIR17HG	407975
SATB2	23314
ANGPTL2	23452
FCGR2C	9103
CRTC1	23373
DIABLO	56616
AK5	26289
VWF	7450
REPS2	9185
GRIK2	2898
LOC102724511	102724511
TM4SF1-AS1	100874091
CACNA1G	8913
MAN2B2	23324
LINC01133	100505633
SASH1	23328
LYNX1	66004
NFE2	4778
FAM83C-AS1	140846
TNNT1	7138
CATSPER1	117144
CSPG4	1464
TFF3	7033
URAHP	100130015
SEZ6L2	26470
FCRLB	127943
DPY19L1	23333
SZT2	23334
NRGN	4900
OSGEPL1-AS1	101409258
GALR3	8484
LINC00173	100287569
PDE6G	5148
COG7	91949
KCNH5	27133
STARD5	80765
PDGFRB	5159
SOX12	6666
GNAO1	2775
REN	5972
PDGFA	5154
OLFML2A	169611
ARL4C	10123
FRAT2	23401
CRLF1	9244
TFPI2	7980
L1CAM	3897
WDR86	349136
PCSK9	255738
COL4A6	1288
SPANXN4	441525
LAMA4	3910
LOC100996249	100996249
VSX1	30813
MINCR	100507316
DNAH2	146754
CLN6	54982
TMEM121	80757
SLX4IP	128710
LOC101928012	101928012
B4GALNT1	2583
HLA-DMA	3108
BAHCC1	57597
MPP1	4354
GGT7	2686
MROH7	374977
RIN1	9610
OR9A2	135924
PCYOX1L	78991
POLH	5429
ZSCAN16-AS1	100129195
LRRC24	441381
SPRR2C	6702
SNORD84	692199
PYY2	23615
TMEM50B	757
ANKRD13C	81573
CALML6	163688
KSR1	8844
VGLL3	389136
SNX9	51429
VAMP2	6844
SLC22A1	6580
CNTNAP3	79937
RNF222	643904
FLNC	2318
OBSCN	84033
CD28	940
RHBDL1	9028
ALDH5A1	7915
MMAB	326625
SLC6A7	6534
ZNF503	84858
MARC2	54996
TMEM253	643382
SLAIN2	57606
ULBP2	80328
CISD3	284106
SOX7	83595
RILP	83547
ELFN1	392617
SEC14L4	284904
LINC01431	100505683
ABCC6	368
STARD3	10948
SLC48A1	55652
MPP2	4355
FADS2	9415
FAM25A	643161
LOC101929294	101929294
LINC00668	400643
ZBTB46	140685
PAPSS1	9061
PTGER1	5731
FNDC11	79025
PTGDS	5730
TCERG1L-AS1	101927489
PTGER2	5732
CTB-178M22.2	101927862
CELSR1	9620
MCAM	4162
SPATA7	55812
FBLIM1	54751
ST6GALNAC1	55808
LY6D	8581
DEFB104B	503618
FCRL6	343413
NALCN	259232
MALL	7851
SCGB3A1	92304
RDM1	201299
EMP2	2013
TNKS2	80351
ASB18	401036
ZNF365	22891
AMTN	401138
ATP2A3	489
HCN3	57657
JKAMP	51528
ARHGEF37	389337
TTC12	54970
GPRIN1	114787
UVSSA	57654
OSBPL5	114879
ST3GAL6	10402
PLAT	5327
SLC35G2	80723
IL1RAPL1	11141
SERPINF2	5345
IQCE	23288
TXNRD3	114112
PRRG4	79056
SIX3	6496
MAL2	114569
RNF217	154214
ZSWIM5	57643
AQP7P1	375719
LNX1	84708
MIA3	375056
MT1M	4499
EFHC1	114327
COL25A1	84570
KDELR3	11015
P4HTM	54681
S1PR5	53637
PEAR1	375033
ABHD11-AS1	171022
EML1	2009
ADGRL1	22859
CEBPA	1050
LRRC3C	100505591
P2RX6P	440799
H2AFJ	55766
PLAU	5328
GALNT13	114805
PTGER3	5733
LKAAEAR1	198437
PTCHD4	442213
PI16	221476
RBPMS	11030
BNIP3L	665
BCL9	607
CYBA	1535
CYP17A1	1586
ZCCHC24	219654
NPIPA2	642799
RNASE4	6038
MYL5	4636
CYGB	114757
HIC1	3090
DOK4	55715
CCDC153	283152
EXD3	54932
UNCX	340260
MEGF6	1953
GDPD5	81544
CCDC96	257236
SUGCT	79783
MYO1A	4640
SGMS1-AS1	104355295
CCER2	643669
CNTNAP5	129684
MAB21L2	10586
RAMP1	10267
UBXN7	26043
AMY1C	278
CA3-AS1	100996348
EPOR	2057
LMTK3	114783
NEFM	4741
DISC1	27185
MYO3A	53904
SNED1	25992
C1QL4	338761
FGFR3	2261
PPP1R16B	26051
TSPAN18	90139
COQ9	57017
PDK3	5165
SLC34A2	10568
F8	2157
RAD51-AS1	100505648
ASPH	444
TMEM204	79652
FKBP7	51661
HSF4	3299
NEIL1	79661
B3GAT2	135152
ABHD1	84696
NEU4	129807
EDEM3	80267
AMIGO1	57463
SLC29A4	222962
APC2	10297
PDLIM5	10611
LINC01489	101928340
MIR600HG	81571
FUCA1	2517
FOXD3-AS1	100996301
GCGR	2642
ACOT11	26027
LOC102724050	102724050
ST6GALNAC2	10610
P3H4	10609
MXD4	10608
TCEAL8	90843
CDC42EP3	10602
ARL13A	392509
UNC13A	23025
FAM222A-AS1	84983
GALK1	2584
ADAM19	8728
CYSRT1	375791
GDF11	10220
LOC101927661	101927661
ATP6V0E2-AS1	401431
RNF112	7732
IL1B	3553
TSKU	25987
LINC00342	150759
GP9	2815
FLT4	2324
KIAA0513	9764
PRR34-AS1	150381
GOLGA8A	23015
COL8A1	1295
COL15A1	1306
COL9A3	1299
SLC31A1	1317
MOXD1	26002
CAMK2N2	94032
SLC37A1	54020
GLYAT	10249
RIMS3	9783
PLXND1	23129
SCN1A	6323
ROPN1L	83853
ASIC3	9311
ZMAT3	64393
CRYAB	1410
MROH2A	339766
CRYM	1428
TMEM8B	51754
C1QTNF6	114904
HPS1	3257
GDAP1	54332
DPM3	54344
SCN1B	6324
MTSS1	9788
TAP1	6890
CPT1B	1375
PRSS21	10942
TSPAN10	83882
CPE	1363
HIP1R	9026
CRABP2	1382
CYCS	54205
NTNG1	22854
UTS2R	2837
SPOCK2	9806
HMX1	3166
ROBO2	6092
FLG-AS1	339400
MKNK2	2872
HOXA10	3206
EIF5A2	56648
MSMB	4477
BSCL2	26580
MST1R	4486
SYP	6855
ARMCX1	51309
BTF3L4	91408
TCEA3	6920
SPACA9	11092
PNPO	55163
GBP1	2633
FZD10	11211
CH25H	9023
PRSS27	83886
STRN	6801
MTRNR2L9	100463487
SPOCK3	50859
TTC39A	22996
TNRC18	84629
RUNDC3B	154661
GAP43	2596
IFNE	338376
MMP15	4324
COL6A1	1291
PXYLP1	92370
SYT11	23208
KRTAP3-2	83897
NADSYN1	55191
MMP7	4316
ORAI3	93129
LOC102724814	102724814
TIGAR	57103
YIF1B	90522
PNPLA2	57104
GRIN3B	116444
FNTB	2342
SATB1	6304
TP53INP1	94241
CLU	1191
SPTSSA	171546
DSEL	92126
C8G	733
ASAP3	55616
B4GAT1	11041
CTSB	1508
PGM2L1	283209
CSAD	51380
SHOX	6473
PELI3	246330
LOC100130476	100130476
IZUMO4	113177
EXOC3L4	91828
B3GNT9	84752
IGF1	3479
RNVU1-18	26863
CRYL1	51084
KSR2	283455
SSR1	6745
IL19	29949
LRRC19	64922
FBXO2	26232
PLCL2	23228
SEL1L3	23231
PAQR9-AS1	101927832
TNXB	7148
SPARC	6678
CYP20A1	57404
TWIST2	117581
MYRF	745
NDRG4	65009
C1GALT1C1	29071
CDC25B	994
LOC100289361	100289361
ABCA7	10347
TMEM164	84187
RAD51D	5892
FOXB1	27023
ACTA2-AS1	100132116
LINC01348	731656
CD33	945
MRGPRF	116535
SEMA3B	7869
TBC1D26	353149
SLC6A15	55117
NRBP2	340371
LOXL4	84171
APBB3	10307
PCSK1N	27344
MLPH	79083
LAMC3	10319
DPYSL3	1809
SLC38A3	10991
RBFOX3	146713
EMB	133418
IFI44L	10964
XPC	7508
PIK3R5	23533
TBC1D1	23216
ADIRF	10974
LOC100129434	100129434
UFSP1	402682
DERL3	91319
MPPE1	65258
WNT11	7481
CD79A	973
PYCARD	29108
ELOVL5	60481
WDR72	256764
FGD2	221472
TGFBR3L	100507588
FOXL2	668
PPARGC1A	10891
PFKL	5211
LOC100507564	100507564
NLRC5	84166
BCL2L11	10018
LOC100505938	100505938
LARGE-AS1	100506195
LRRC72	100506049
RIBC1	158787
TK2	7084
IQSEC3	440073
ZNF214	7761
HLA-DRB3	3125
ANKRA2	57763
LILRA1	11024
TRANK1	9881
LOC100506497	100506497
PDIA2	64714
SARDH	1757
CCDC80	151887
URB1	9875
HS3ST3B1	9953
LMNTD2	256329
KBTBD13	390594
KRT42P	284116
CC2D2A	57545
STPG1	90529
FLVCR2	55640
CD24	100133941
HSPG2	3339
DBP	1628
PIGZ	80235
MFAP2	4237
PNPLA7	375775
CTSO	1519
POU2F3	25833
N4BP2L2	10443
RAB26	25837
PLCE1	51196
PRODH	5625
ZNF324	25799
SESTD1	91404
SHISA3	152573
TCTN1	79600
CCDC159	126075
DNAH5	1767
ELOVL2	54898
EID1	23741
CASZ1	54897
MEG3	55384
AXIN2	8313
HYMAI	57061
SPAG8	26206
CORO7	79585
PDIA5	10954
CHPF	79586
CPT1C	126129
RAB14	51552
CAMK2N1	55450
RABAC1	10567
AMACR	23600
COPS7A	50813
RAB11FIP1	80223
NKAIN1	79570
ATP2B4	493
ERCC1	2067
RETSAT	54884
RABGAP1L	9910
TMEM59L	25789
NALT1	101928483
NUFIP2	57532
KREMEN1	83999
GPT	2875
MIB1	57534
KIAA1324	57535
DNPEP	23549
HYAL1	3373
BACE2	25825
BACE1	23621
SRRM3	222183
TMEM151A	256472
SRD5A3	79644
FUZ	80199
AP1S3	130340
PRRT3	285368
TMEM175	84286
GABRQ	55879
PCDH19	57526
CTSH	1512
TRIOBP	11078
LOC254896	254896
PSMG3-AS1	114796
ADAM8	101
OSBP2	23762
CARMIL2	146206
RNF32	140545
HAS2	3037
SH3TC2	79628
RALGPS2	55103
CKMT1A	548596
FOXP2	93986
HSD11B1L	374875
CYFIP2	26999
LINC01184	644873
ANXA9	8416
CRIP2	1397
CFAP44	55779
KLHL35	283212
ULK1	8408
TRIM36	55521
TRIM31-AS1	104533120
ZXDC	79364
PDIA3	2923
KLHL42	57542
GRPR	2925
IGSF9	57549
LINC00482	284185
CFB	629
NCF1	653361
CARD17	440068
IQCA1	79781
INA	9118
RSPH1	89765
ZMYND10	51364
PLCD4	84812
NPHP1	4867
PARD6A	50855
CDC42BPG	55561
EMILIN1	11117
SLC30A4	7782
FBLN5	10516
STXBP5	134957
CDON	50937
TM7SF3	51768
RERGL	79785
TXNDC17	84817
RAB6B	51560
SLC12A5	57468
MEFV	4210
GLIPR2	152007
ATP8B3	148229
RDX	5962
PTK6	5753
ARHGAP33	115703
CORO1A	11151
PYROXD2	84795
VASH2	79805
S100P	6286
PGGHG	80162
TBX3	6926
LFNG	3955
AZU1	566
ADGRB1	575
SRPX	8406
SMC1A	8243
AATK	9625
LOC388242	388242
CHSY3	337876
GSTCD	79807
NAGA	4668
LDHD	197257
TRABD2A	129293
CAT	847
WWP1	11059
ALDH1L2	160428
LOC100129931	100129931
APPBP2	10513
LY9	4063
CA9	768
AFAP1L2	84632
RIMKLA	284716
ALDH3A1	218
LINC00163	727699
GPR132	29933
SGCB	6443
PMCHL1	5369
SCLY	51540
BEST3	144453
KLHL22	84861
ADGRA2	25960
MIR2052HG	441355
VAT1	10493
VAV3-AS1	100873946
KLHDC9	126823
MAP1A	4130
STAP2	55620
P2RY2	5029
HMGA2	8091
FNDC3A	22862
C1R	715
ADAMTS8	11095
IDUA	3425
ENDOV	284131
PRR15	222171
STN1	79991
SEC14L2	23541
ODF3L1	161753
DHRS12	79758
RUVBL1-AS1	100874089
CBR3	874
CAPG	822
CANX	821
RRP15	51018
FAM78A	286336
ATG16L2	89849
GPR162	27239
SYT17	51760
ITGB2	3689
ITGB4	3691
JAK3	3718
ANOS1	3730
SLC25A41	284427
RAET1E-AS1	100652739
EFEMP2	30008
TMEM145	284339
RAB8B	51762
XPNPEP3	63929
TRIM38	10475
LINC01521	54944
MXD3	83463
LIF	3976
GPR20	2843
PTPRM	5797
LINC00324	284029
KRTAP19-2	337969
PTPRJ	5795
PTPRH	5794
IQCG	84223
ANKRD42	338699
CDSN	1041
LRRC56	115399
ZNRF1	84937
PTPRN	5798
LMO1	4004
LOX	4015
CHN2	1124
CPB2-AS1	100509894
ANO9	338440
ARSI	340075
MAP3K5	4217
GPR137C	283554
DESI2	51029
PARP10	84875
POT1	25913
TMEM25	84866
CBR4	84869
ORAI1	84876
FAM3C	10447
PTK7	5754
QSOX1	5768
PTN	5764
RPRML	388394
LINC01233	100128139
LRP3	4037
GJB5	2709
LOC283335	283335
DNPH1	10591
NEBL	10529
SCD5	79966
CTSA	5476
CHURC1	91612
JAG2	3714
MANBA	4126
MAN1A1	4121
DCUN1D5	84259
SLC2A12	154091
DIRAS1	148252
LINC01140	339524
FAM210B	116151
OR2A2	442361
LHX9	56956
LOC91450	91450
RGCC	28984
H1FX-AS1	339942
SELENOM	140606
CNRIP1	25927
CD302	9936
ZNF521	25925
ADSSL1	122622
OR5L2	26338
C1QTNF3	114899
P3H1	64175
LOC100130691	100130691
MYZAP	100820829
SNHG18	100505806
HHIPL1	84439
AQP1	358
FAM20C	56975
SV2A	9900
SPATA13	221178
OR10G3	26533
DKK3	27122
MICB	4277
GGTLC2	91227
PEX6	5190
SELENBP1	8991
HLA-F-AS1	285830
SCML1	6322
SLC22A23	63027
ZNF385A	25946
PLEKHG5	57449
PI15	51050
ADRA2C	152
LINC01019	285577
UBE2DNL	100131816
STMN3	50861
PLCXD3	345557
MMP11	4320
PKP1	5317
PKD2	5311
SPAG9	9043
PKLR	5313
PPP1R1A	5502
RGS11	8786
DIS3	22894
PQLC3	130814
DNAJC30	84277
FBRSL1	57666
GUCY2EP	390226
SCAND2P	54581
CCDC187	399693
GPR161	23432
CYP24A1	1591
ENTPD2	954
COL8A2	1296
CTU2	348180
NKG7	4818
ZKSCAN7	55888
MON1B	22879
ABLIM3	22885
TNFRSF10C	8794
HES6	55502
NEURL1B	54492
MT1DP	326343
LYPD3	27076
CSF1R	1436
FGFR1	2260
LGR6	59352
OSTM1	28962
IL36A	27179
CCDC18	343099
ADAM12	8038
PLEKHA6	22874
STRA6	64220
HS1BP3	64342
PLAGL1	5325
SCG2	7857
CYP2B6	1555
RGL3	57139
CEP112	201134
GBP3	2635
CYP7A1	1581
TPK1	27010
SCARNA10	692148
LINC00698	285401
RHBDF1	64285
LINC01018	255167
BSN	8927
IRF5	3663
MESP1	55897
CYP4A11	1579
GOLGA6L1	283767
NCCRP1	342897
TMEM107	84314
HTRA1	5654
PRSS8	5652
TMEM140	55281
FGGY	55277
IL6R	3570
CELF2	10659
OSCAR	126014
PMEPA1	56937
GLS	2744
VASH1	22846
SEMA3G	56920
NDRG2	57447
ATP1A3	478
MYBPHL	343263
SYT7	9066
TMEM200B	399474
NEURL4	84461
OTUB2	78990
LOC101929295	101929295
ABHD15	116236
YPEL2	388403
ZNF649-AS1	101928571
TMCO4	255104
CNPY4	245812
MAPK11	5600
CYP4F12	66002
TCEA1	6917
KANK4	163782
CCK	885
CACNB3	784
LOC101927993	101927993
VSIG1	340547
UCP3	7352
PITPNM3	83394
MAPK4	5596
RBM3	5935
LAMA3	3909
RBP4	5950
SLC5A10	125206
CALHM2	51063
TXNDC12	51060
SNN	8303
P2RY10	27334
CFLAR	8837
PRRT3-AS1	100874032
RAB22A	57403
ICA1	3382
HMGN1	3150
MEIS3	56917
GDF10	2662
PROS1	5627
NGEF	25791
BDKRB1	623
MAPK8	5599
C5AR2	27202
MUC16	94025
TTLL1	25809
PLCB2	5330
WDR78	79819
JPH3	57338
GCSAM	257144
TTC14	151613
TTYH1	57348
RCN3	57333
LRRC27	80313
RAVER1	125950
PSCA	8000
LIMS1	3987
NR2F1	7025
TMPRSS2	7113
GRIN3A	116443
MYBPH	4608
ADAMTSL4	54507
PRAC2	360205
MST1L	11223
SIRT5	23408
SLC9A5	6553
CDHR4	389118
CYP39A1	51302
SC5D	6309
VWDE	221806
SMOX	54498
SMIM10L2B	644596
MORC4	79710
CDH12	1010
SESN1	27244
GPR155	151556
RASSF5	83593
AQP3	360
NPNT	255743
GALNT12	79695
MATN2	4147
MANEA	79694
GSTT2B	653689
CAPS	828
PLEKHG7	440107
IFI6	2537
C3AR1	719
SOX3	6658
SOX5	6660
OGFOD3	79701
MEOX1	4222
LOC101928100	101928100
CCDC87	55231
MMP2	4313
BMPER	168667
BAIAP2L2	80115
DENND1C	79958
PAQR6	79957
RNU4ATAC	100151683
PDLIM3	27295
MMP25-AS1	100507419
HACD4	401494
SLCO2A1	6578
SMO	6608
DOCK2	1794
SNHG11	128439
KCNV2	169522
RBL2	5934
BBOF1	80127
CCDC33	80125
RTN2	6253
PLPPR3	79948
SRPX2	27286
CECR3	27442
TMEM170B	100113407
SLC47A1	55244
LRRC46	90506
OGDHL	55753
CCDC25	55246
SPINK4	27290
TMEM30A	55754
KCNQ2	3785
GPR183	1880
H19	283120
PGAP3	93210
ETV1	2115
BCL2L15	440603
FAS-AS1	100302740
VPS9D1	9605
CD53	963
ITGA11	22801
TRPM6	140803
CXXC5	51523
ZNF280D	54816
PDE4A	5141
TMEM87B	84910
FBLN2	2199
CPQ	10404
WAS	7454
ENTPD4	9583
SLC35E1	79939
CALHM3	119395
KIAA0319L	79932
HSH2D	84941
KRT19	3880
LOC101927499	101927499
IGFL1	374918
LOC102031319	102031319
RBAK-RBAKDN	100533952
COL5A2	1290
LINC01556	729583
QPCT	25797
YJEFN3	374887
KRT86	3892
TMEM205	374882
KRT83	3889
GAMT	2593
ENPP2	5168
COPZ2	51226
ATP9B	374868
LINC01433	728228
SAMD9	54809
EPB41L1	2036
PEG3	5178
CORO6	84940
AIG1	51390
ATL1	51062
VAMP1	6843
PLXNB2	23654
LGALS9C	654346
ACTA2	59
ACP5	54
LOC155060	155060
RBM4	5936
ACTG2	72
DNM1	1759
ARHGAP4	393
TNS4	84951
FDXR	2232
CDKN3	1033
DENND1A	57706
FANK1	92565
DHRS9	10170
FOXS1	2307
GAD1	2571
ATXN1	6310
PRRT2	112476
AKT2	208
SLC12A3	6559
HEMK1	51409
CERCAM	51148
ALOX5AP	241
PLTP	5360
KLK1	3816
RGMB-AS1	503569
DDX60	55601
LPCAT1	79888
GIP	2695
GBP2	2634
HMGB4	127540
CD82	3732
EBLN3P	100506710
KLRG2	346689
SLC25A6	293
TET1	80312
LCE2A	353139
FOXO6	100132074
ITPR2	3709
ITPR1	3708
ABCA4	24
YAF2	10138
FOXL2NB	401089
TGFBI	7045
APOC1	341
ABCC8	6833
OTUD7A	161725
THSD4	79875
KCNG1	3755
SIDT2	51092
PLEKHG4	25894
TIMP3	7078
THBD	7056
LINC00853	100874253
TP53INP2	58476
FAM74A1	401507
NCSTN	23385
LINC00271	100131814
SCG5	6447
TMEM190	147744
CPNE5	57699
ITGA2	3673
TGM6	343641
SLC2A1-AS1	440584
PPP4R1-AS1	101927323
AOX1	316
ELFN2	114794
G0S2	50486
ITGA5	3678
PLA2G3	50487
APBA1	320
TSPAN9	10867
DHTKD1	55526
ADHFE1	137872
ADARB2	105
SHOX2	6474
CALY	50632
LINC01444	101927642
PODXL2	50512
RNF157	114804
TMEM95	339168
AQP7	364
HLA-C	3107
DGCR2	9993
LIN7B	64130
PLXNB3	5365
SESN3	143686
DNHD1	144132
SMCR8	140775
TNS2	23371
COG1	9382
FSTL4	23105
C1QTNF1	114897
ABCG1	9619
SCEL	8796
NIN	51199
STYX	6815
ZG16B	124220
OBSL1	23363
IL27	246778
WFDC5	149708
KLHL29	114818
SARM1	23098
ALOX15B	247
FAXDC2	10826
ACOXL	55289
IQSEC2	23096
SLC51B	123264
MPZL2	10205
KCTD12	115207
MYO1G	64005
RUNDC3A	10900
DDIT4L	115265
TNFAIP2	7127
ALDOC	230
BEAN1	146227
ANGPT1	284
ANG	283
APLP1	333
TMEM123	114908
DPYSL5	56896
PRKCB	5579
TMEFF2	23671
IQCD	115811
MEX3D	399664
RAB3C	115827
CCSAP	126731
BMP1	649
TRAK2	66008
LRRC73	221424
SP8	221833
BTBD3	22903
MTMR9LP	339483
TNFRSF14	8764
GPR150	285601
XYLB	9942
LOC100506688	100506688
DCBLD2	131566
DHX57	90957
NPM2	10361
STXBP5L	9515
TNFSF10	8743
FAM89A	375061
ZBTB42	100128927
MAST1	22983
RNF208	727800
FCGR2A	2212
TMEM125	128218
FGFBP1	9982
GNG4	2786
PLA2R1	22925
POFUT1	23509
RIMS1	22999
IL17RB	55540
GPAA1	8733
MYO5C	55930
RIMBP2	23504
LOC100129917	100129917
CLEC2B	9976
ENDOD1	23052
MYOM1	8736
CHADL	150356
TNFSF12	8742
ALDH7A1	501
RAET1E	135250
DDX60L	91351
MAP4K4	9448
NKX3-2	579
LOC606724	606724
ZC3H6	376940
ENHO	375704
PLEKHA4	57664
HCN2	610
SCAMP5	192683
HCG14	414760
SPIRE2	84501
MAFTRR	102467146
CACNA2D3	55799
TMEM229B	161145
CHDH	55349
CABP7	164633
RBPMS2	348093
RNASET2	8635
PMCH	5367
RBAK	57786
PSMB8-AS1	100507463
ZBTB44	29068
ERLIN2	11160
INO80C	125476
ITGA4	3676
MIR155HG	114614
N4BP1	9683
TPCN1	53373
RFPL3S	10737
SLC43A3	29015
CD36	948
ADAM15	8751
CCDC113	29070
TCEANC2	127428
SPANXA2-OT1	619455
ZNF488	118738
MAOB	4129
LINC00941	100287314
PLPPR2	64748
LY6G6E	79136
CRELD2	79174
COL24A1	255631
PDE8B	8622
TMEM106B	54664
FKTN	2218
VPS13D	55187
LOC101929231	101929231
SEMA6C	10500
NES	10763
NECTIN4	81607
SNRPE	6635
SLC27A3	11000
DAPL1	92196
CDKN2B-AS1	100048912
VMAC	400673
MAPT-AS1	100128977
CROT	54677
PNMT	5409
SFT2D2	375035
FAM229A	100128071
NPDC1	56654
DGKA	1606
LOC100130238	100130238
EGFL7	51162
ANKRD26P3	100101938
TST	7263
NFYC-AS1	100130557
BTBD16	118663
ATP6V1C2	245973
IL11RA	3590
RNF215	200312
ZBTB7C	201501
PI3	5266
TDRD6	221400
BLOC1S6	26258
FKBP14	55033
WFDC1	58189
TRPS1	7227
CYSLTR1	10800
B3GALT4	8705
SMARCD3	6604
AHNAK2	113146
CCDC114	93233
SH2B2	10603
SFXN5	94097
GHDC	84514
VIPR2	7434
ENTPD8	377841
SPTBN4	57731
CNFN	84518
HNF4A-AS1	101927219
RABGEF1	27342
VGF	7425
KIFC2	90990
IGLL1	3543
LOC101928324	101928324
TTC9B	148014
CHRNA7	1139
APOBEC3C	27350
CTSF	8722
SPOCD1	90853
DARS-AS1	101928243
SLC39A3	29985
MGAT5B	146664
SPRN	503542
PRR36	80164
SYNM	23336
CES1	1066
SRRM2-AS1	100128788
CPLX1	10815
MST1	4485
SLC2A5	6518
MYO15B	80022
HERC6	55008
SYNGR1	9145
CEP85L	387119
CRIP3	401262
MTRNR2L3	100462983
P4HA2	8974
FAM81A	145773
IL2RB	3560
RAB27B	5874
SLC35B2	347734
GAST	2520
ISLR	3671
LINC01108	102216342
OSM	5008
LOC101929626	101929626
MTRNR2L7	100288485
HS1BP3-IT1	100874343
KCTD19	146212
HSD17B1	3292
SCAMP1	9522
ARHGAP42	143872
GPC5	2262
LOC102724450	102724450
ACAP3	116983
PBXIP1	57326
AMDHD1	144193
GLT8D2	83468
FOXD1	2297
GSTO2	119391
LOC283710	283710
GP1BB	2812
SLC22A18	5002
UBE2Q2L	100505679
LGALS3BP	3959
ANKMY1	51281
GAS6	2621
KRTAP19-8	728299
FGFBP3	143282
FAP	2191
TMEM37	140738
NOTCH3	4854
LAMA1	284217
PDE4D	5144
KRT7	3855
LOC100288637	100288637
DNM3	26052
PTPRO	5800
DIRC3	729582
CHAT	1103
NKX1-2	390010
HGSNAT	138050
ODF3L2	284451
THEM5	284486
ZADH2	284273
TRPC1	7220
ADGRL2	23266
EPHA5	2044
EPHA4	2043
MIR210HG	100506211
ABCA1	19
HOMER3	9454
UNC93B1	81622
KCNK6	9424
NCR2	9436
ECM1	1893
LRRC69	100130742
CYB561	1534
MFSD13A	79847
INPP5D	3635
CLPSL2	389383
ZDHHC11	79844
TSPAN14	81619
ACSBG2	81616
KPNA7	402569
WDR27	253769
TMPRSS3	64699
AGPAT5	55326
KREMEN2	79412
NFATC2IP	84901
PLXDC2	84898
TMTC4	84899
SPTLC3	55304
DNAJC4	3338
MELTF-AS1	100507057
SEMA3F	6405
CCDC136	64753
IFI27	3429
TIGD6	81789
SUGP1	57794
RPH3A	22895
ADAMTS10	81794
ARHGEF39	84904
LINC00161	118421
SLC1A1	6505
SLC1A2	6506
DEPDC5	9681
TRMO	51531
SPEG	10290
SIAE	54414
VTA1	51534
SFXN1	94081
SHANK3	85358
ACSL5	51703
CTAGE1	64693
CCDC74A	90557
NFATC2	4773
DISP2	85455
ZNRF2P1	441208
ADGRG2	10149
TMEM97	27346
A2MP1	3
A2M	2
A1BG	1
AAMP	14
NAT2	10
KALRN	8997
FLNA	2316
GAS6-AS1	650669
SLC22A3	6581
SLC25A16	8034
NLRC3	197358
MORN4	118812
TBC1D3L	101060376

## Sheet: Table S3_BPs_DOWN_DGEs
ID	Description	GeneRatio	BgRatio	pvalue	p.adjust	qvalue	geneID	Count
GO:0034660	ncRNA metabolic process	120/2033	470/17913	3.29084658681729e-18	1.87907340107267e-14	1.66101151408304e-14	RC3H2/PARN/TAF8/RPP38/MARS2/CCNT2/RCL1/SENP3/TRMT5/SNU13/ZBTB8OS/HNRNPA2B1/PPA1/NVL/PWP2/EEF1E1/PA2G4/RPRD1A/POLR2F/RRP9/LYAR/INTS6/GTF3C5/WDR4/YARS/KHSRP/NHP2/EXOSC2/HRAS/DARS2/NCL/GATC/ASZ1/DDX47/ERI1/NFKB1/RARS2/BMS1/REXO4/INTS12/UTP15/GARS/NABP1/CCNK/ELP3/WDR74/SARS/DROSHA/SNAPC5/CHD7/POLR3K/XPO5/NSUN2/DKC1/CSTF2/TRMT1/ZC3H12A/KRR1/EMG1/SEPSECS/EXOSC3/SBDS/UTP11/RPUSD4/NOB1/DTD1/NOL11/NOP10/Z…	120
GO:0022613	ribonucleoprotein complex biogenesis	90/2033	381/17913	6.58551893267698e-12	1.88016565527928e-08	1.6619770148519e-08	ZRSR2/G3BP1/RCL1/SENP3/SNU13/CUL4A/CNOT7/NPM1/ERAL1/NVL/PWP2/GEMIN2/PA2G4/RRP9/LYAR/PSIP1/NHP2/EXOSC2/CD2BP2/CRNKL1/HSP90AA1/DDX47/ERI1/MRPL10/RPF2/BMS1/REXO4/GCFC2/UTP15/MPV17L2/ATXN2/WDR74/WDR77/DDX31/DROSHA/CHD7/DHX9/SF3A3/DKC1/CUL4B/NOCT/AATF/KRR1/EMG1/EXOSC3/SBDS/UTP11/STYXL1/CLNS1A/NOB1/NOL11/NOP10/EIF3C/CNOT6/NUDT16/WDR3/PTEN/NOL9/XPO1/DIMT1/IMP4/TSC1/MRM1/UTP4/HSP90AB1/MRTO4/TRMT112/TGS1/…	90
GO:0006403	RNA localization	55/2033	208/17913	1.14737900487179e-09	1.31030682356359e-06	1.15824891123373e-06	PARN/SMG7/CCT8/UPF3B/WDR33/XPOT/IGF2BP1/THOC5/DDX19B/RUVBL1/HNRNPA2B1/EIF4E/HNRNPU/RAE1/UPF2/KHSRP/NHP2/NUP98/CCT2/CCT7/U2AF1L4/NUP205/UPF1/DDX39A/ATXN2/RFTN1/XPO5/DHX9/PABPN1/DKC1/TCP1/TERF1/THOC7/AGFG1/MAGOH/SEH1L/NOP10/NXT2/SMG6/ZFP36/XPO1/KIF5C/SRSF4/NUP133/TSC1/SRSF3/SMG5/RBM8A/SENP2/MRPL18/SRSF9/NUP153/HSF1/DDX19A/RIOK2	55
GO:1901987	regulation of cell cycle phase transition	97/2033	464/17913	1.37724432349327e-09	1.31067751452443e-06	1.15857658441232e-06	MAD2L2/CDC23/CNOT4/MIR29A/MIR29B2/KMT2E/CDCA5/AURKB/BRD4/APC/XRCC3/PAGR1/CDK4/NEDD1/CDKN2A/CTDSP2/CUL4A/CNOT7/NPM1/PSMD5/E2F4/CYP1A1/CDC14B/ZW10/ANAPC1/ATF5/CLASP1/TUBB/MECP2/FBXW7/BTRC/PSMC4/CNOT9/ZNF655/EP300/NDC80/HSP90AA1/NBN/ALMS1/PML/BCL2/HAUS2/AURKA/PSMD6/ANKRD17/BRD7/CDC25C/VPS4A/TUBA4A/CUL4B/RPTOR/MDM2/CHEK1/CNTRL/ANAPC10/PSMC1/JADE1/PSMD11/PSMD12/BID/PSMD8/MUC1/EGFR/PSMB6/CNOT6/PSMB3/PS…	97
GO:0051052	regulation of DNA metabolic process	86/2033	403/17913	4.27545441852362e-09	2.44128447297698e-06	2.1579793617706e-06	MAD2L2/PARN/MIR29A/MIR29B2/PARP9/AURKB/TRIP12/CCT8/CUL4A/EYA3/HNRNPA2B1/NPM1/NVL/OGG1/HNRNPU/IL7R/WRN/PPARG/BCL6/MECP2/POLQ/FBXW7/SMC3/HDAC8/TIPIN/RBBP6/HRAS/HSP90AA1/NBN/CCT2/CCT7/MSH6/UPF1/RFC3/PML/TERF2IP/MIS18A/RIF1/IL6/RAD51/RAD17/ANKRD17/DHX9/DKC1/ANKRD1/TCP1/TERF1/EXOSC3/PDS5A/PAM16/CHEK1/GREM1/GRHL2/MAP3K4/MBD2/EGFR/KCNK2/CACYBP/SETDB1/HUS1/NUDT16/NUDT16L1/CBX8/SMG6/E2F8/FUS/PRKD2/OTUB1/H…	86
GO:0015931	nucleobase-containing compound transport	55/2033	221/17913	1.19870596973229e-08	5.55974535786907e-06	4.91455046381827e-06	SLC35E3/SMG7/UPF3B/WDR33/XPOT/IGF2BP1/THOC5/DDX19B/HNRNPA2B1/EIF4E/HNRNPU/RAE1/SLC25A25/UPF2/KHSRP/SLC25A32/NUP98/U2AF1L4/NUP205/UPF1/DDX39A/ATXN2/RFTN1/XPO5/DHX9/PABPN1/THOC7/AGFG1/MAGOH/SLC25A17/SEH1L/SLC25A19/SLC25A33/NXT2/SLC35A3/SLC35A2/SMG6/ZFP36/XPO1/KIF5C/SRSF4/NUP133/TSC1/SRSF3/SMG5/SLC25A4/RBM8A/SENP2/MRPL18/EPG5/SRSF9/NUP153/HSF1/DDX19A/RIOK2	55
GO:0051169	nuclear transport	69/2033	305/17913	1.26579141247457e-08	5.55974535786907e-06	4.91455046381827e-06	SMG7/XPO6/UPF3B/WDR33/XPOT/THOC5/DDX19B/NF1/HNRNPA2B1/NPM1/EIF4E/SUFU/GEMIN2/RAE1/PSIP1/TNPO3/UPF2/STAT3/BAG3/EMD/NUP98/U2AF1L4/NUP205/UPF1/PML/MMP12/DDX39A/GSK3B/RPAIN/RBM4/FBXO22/ECT2/HMGA1/IPO11/XPO5/DHX9/MDFIC/PABPN1/MDM2/ZC3H12A/THOC7/AGFG1/ANP32A/MAGOH/SEH1L/MALT1/SMG6/IPO4/XPO1/SRSF4/NUP133/TSC1/TNPO1/KPNA4/KPNB1/SRSF3/SMG5/PRKACA/RBM8A/SNRPG/SNRPF/SNRPB/SRSF9/CBLB/HSPA9/NUP153/KPNA6/SNRPD…	69
GO:0043487	regulation of RNA stability	44/2033	163/17913	2.64388873287847e-08	1.078328904624e-05	9.53191464221975e-06	PARN/IGF2BP1/CARHSP1/NPM1/PSMD5/HNRNPU/PSMC4/DCP1A/KHSRP/EXOSC2/ELAVL1/HSPA1A/PDE12/UPF1/HNRNPR/PSMD6/DHX9/DKC1/NOCT/ZC3H12A/ANP32A/EXOSC3/PSMC1/RBM24/PSMD11/PSMD12/PSMD8/PSMB6/PSMB3/PSMB2/PSMA3/PSMA5/PSMA6/ZFP36/XPO1/TNPO1/LARP1/EXOSC8/PRKCA/EXOSC7/ANGEL2/HSPB1/HNRNPC/PSMD13	44
GO:0000082	G1/S transition of mitotic cell cycle	61/2033	269/17913	7.96616188578282e-08	2.1669551570725e-05	1.91548529415847e-05	CNOT4/MIR29A/MIR29B2/KMT2E/BRD4/CDK4/TYMS/CDKN2A/NPAT/CTDSP2/CUL4A/CNOT7/EIF4E/E2F4/CYP1A1/ORC2/PRIM2/CNOT9/ZNF655/EP300/HINFP/ACVR1B/PML/CRLF3/BCL2/AURKA/ANKRD17/CDC25A/BRD7/CDC25C/MCM7/PPP6C/CUL4B/CUL2/RPTOR/MDM2/CCNH/MAX/CDK3/JADE1/CCNA1/BID/MUC1/EGFR/DHFR/EIF4EBP1/CNOT6/PTEN/CDKN2B/E2F8/LSM10/ACVR1/PPAT/SENP2/PLRG1/POLE2/PRMT2/CTDSPL/PRMT1/ITGB1/LATS2	61
GO:0016311	dephosphorylation	90/2033	458/17913	1.14287563181418e-07	2.59402078415138e-05	2.29299099640628e-05	ALPP/MTMR1/CNEP1R1/SMG7/MFHAS1/TIPRL/DUSP12/PPM1F/FKBP1A/HTT/CTDSP2/EYA3/CD300A/DUSP7/CNST/RPRD1A/TGFB2/CDC14B/SPRED1/IMPAD1/NCK1/BTRC/PTPMT1/PTPA/CSRNP2/PPM1K/CD2BP2/PPP2R2D/CDCA2/ILKAP/CAMTA1/SGPP1/SSH2/SSH1/NSMF/MTMR2/PTP4A3/SLC39A10/PDP1/CYCS/SBF1/PPP1R14B/GSK3B/BCL2/DUSP4/CDC25A/CDC25C/PPP2R5C/NT5C3A/MTMR6/PPP1R15A/PPP6C/MEF2C/DUSP19/PPM1L/PPM1B/DUSP13/DUSP14/PTPRR/STYXL1/PTPN2/PPP3CC/SACM1L…	90
GO:0006470	protein dephosphorylation	67/2033	313/17913	1.92155993568523e-07	4.06374341954174e-05	3.59215590316207e-05	MTMR1/CNEP1R1/MFHAS1/TIPRL/DUSP12/PPM1F/FKBP1A/HTT/CTDSP2/EYA3/CD300A/DUSP7/RPRD1A/CDC14B/NCK1/BTRC/PTPMT1/PTPA/PPM1K/PPP2R2D/CDCA2/ILKAP/CAMTA1/SSH2/SSH1/NSMF/MTMR2/PTP4A3/SLC39A10/PDP1/CYCS/SBF1/PPP1R14B/GSK3B/BCL2/DUSP4/CDC25A/CDC25C/PPP2R5C/MTMR6/PPP1R15A/PPP6C/DUSP19/PPM1L/PPM1B/DUSP13/DUSP14/PTPRR/STYXL1/PTPN2/PPP3CC/LMTK2/PTEN/PPME1/TSC1/HSP90AB1/EYA4/PPP2R2A/PPP2R3A/SWAP70/PPP4R1/SSU72/AR…	67
GO:0032543	mitochondrial translation	35/2033	125/17913	2.60923545962835e-07	5.32097659802782e-05	4.70349023643532e-05	MRPL47/ERAL1/DAP3/MRPL9/DARS2/MRPS30/MRPL28/GATC/MRPL10/MRPL52/MRPS10/MRPS18A/MPV17L2/MRPL44/MRPS17/MRPL2/MRPL39/GFM1/MRPS34/RPUSD4/MRRF/MRPL13/MRPS28/QRSL1/UQCC2/MRPL42/NGRN/MTRF1L/MRPL49/MRPL22/YARS2/MRPL30/MALSU1/MRPL18/MRPL38	35
GO:0032259	methylation	70/2033	336/17913	3.0698873240589e-07	5.84301887345876e-05	5.16495077854821e-05	GNAS/MIR29A/MIR29B2/KMT2E/BRD4/TRMT5/ETFBKMT/TYMS/CTR9/DPY30/EED/NNMT/MECP2/MTRR/WDR4/EEF1AKMT1/COQ3/ASZ1/SETDB2/MIS18A/PEMT/RIF1/SETD5/SETD3/ARID4A/METTL22/SMYD5/SETD9/MAT2B/NSUN2/TET2/ZNF274/KMT5B/GRHL2/MBD2/NTMT1/PRDM2/MLLT6/METTL21EP/NSD1/SETDB1/COMT/TRMT61A/DIMT1/MRM1/GATAD2A/PRDM4/TRMT112/TGS1/PLD6/SMYD4/METTL2A/KDM4C/METTL2B/TRMT2A/KDM1B/SNRPB/PRMT2/WTAP/DOT1L/TRMT61B/PRMT1/PHF19/RBM15/ASM…	70
GO:0140053	mitochondrial gene expression	39/2033	148/17913	3.18520895131274e-07	5.86694939096638e-05	5.18610421784197e-05	MRPL47/TRMT5/ERAL1/DAP3/MRPL9/DARS2/MRPS30/MRPL28/GATC/MRPL10/MRPL52/MRPS10/MRPS18A/MPV17L2/MRPL44/MRPS17/MRPL2/MRPL39/GFM1/MRPS34/RPUSD4/MRRF/MRPL13/SLC25A33/MRPS28/QRSL1/UQCC2/MRPL42/NGRN/MTRF1L/MRPL49/MRPL22/YARS2/MRPL30/PRKAA1/MALSU1/MRPL18/MRPL38/TRMT61B	39
GO:0016570	histone modification	82/2033	420/17913	5.48652044184881e-07	9.49334294635052e-05	8.3916636423174e-05	KMT2E/HDAC2/AURKB/BRD4/TRIP12/RNF2/EPC2/PPM1F/CTR9/RUVBL1/EYA3/DPY30/HAT1/KANSL2/EED/BCL6/JADE2/TRIM37/YEATS4/MECP2/EP300/SETDB2/ATF2/MSL2/PCGF1/RIF1/SETD5/SETD3/ARID4A/ELP3/AURKA/TAF5L/BRD7/NAA50/CUL4B/RBM14/TET2/RSF1/ZNF274/ASXL1/KMT5B/CHEK1/NTMT1/PRDM2/JADE1/ATXN7L3/MUC1/MLLT6/SUPT7L/NSD1/ING5/SETDB1/KAT2B/HDAC1/TADA2A/CBX8/REST/PRKD2/OTUB1/PRDM4/PRKAA1/PRKCA/KDM4C/PCGF5/UBE2N/UBE2E1/KDM1B/UBE…	82
GO:0043618	regulation of transcription from RNA polymerase II promoter in response to stress	31/2033	109/17913	8.54201913409093e-07	0.000135485914599053	0.000119763104526216	KLF2/PSMD5/NCK1/PSMC4/DNAJB1/EPAS1/EP300/BAG3/HSPA1A/CITED2/PSMD6/ATF3/CUL2/CHEK1/PSMC1/PSMD11/PSMD12/PSMD8/MUC1/PSMB6/PSMB3/PSMB2/PSMA3/PSMA5/PSMA6/ATF4/ARNT/DDIT3/PSMD13/ANKRD2/HSF1	31
GO:0016569	covalent chromatin modification	83/2033	433/17913	1.02565649018613e-06	0.000158283744836832	0.000139915302146301	KMT2E/HDAC2/AURKB/BRD4/TRIP12/RNF2/EPC2/PPM1F/CTR9/RUVBL1/EYA3/DPY30/HAT1/KANSL2/EED/BCL6/JADE2/TRIM37/YEATS4/MECP2/EP300/SETDB2/ATF2/MSL2/PCGF1/RIF1/SETD5/SETD3/ARID4A/ELP3/AURKA/TAF5L/BRD7/NAA50/CUL4B/RBM14/TET2/RSF1/ZNF274/ASXL1/KMT5B/CHEK1/MBD2/NTMT1/PRDM2/JADE1/ATXN7L3/MUC1/MLLT6/SUPT7L/NSD1/ING5/SETDB1/KAT2B/HDAC1/TADA2A/CBX8/REST/PRKD2/OTUB1/PRDM4/PRKAA1/PRKCA/KDM4C/PCGF5/UBE2N/UBE2E1/KDM1…	83
GO:0045787	positive regulation of cell cycle	73/2033	373/17913	2.06811544943139e-06	0.000274626493401239	0.000242756758384909	CNOT4/MIR29A/KMT2E/CDCA5/AURKB/CCNT2/BRD4/XRCC3/PAGR1/THOC5/CDK4/CUL4A/CNOT7/NPM1/RAD23A/EIF4E/E2F4/HNRNPU/CYP1A1/TGFB2/NKX3-1/PKP4/MECP2/CSPP1/DYNLT3/CNOT9/EP300/NDC80/PML/CRLF3/CITED2/CCNK/ECT2/AURKA/ANKRD17/FGFR2/CDC25C/CUL4B/RPTOR/MDM2/CHEK1/GATA6/MUC1/EGFR/SPAST/EIF4EBP1/CNOT6/NUDT16/KIF23/CENPV/DDRGK1/BCL2L11/ASNS/E2F8/DYNC1LI1/NSFL1C/DTL/HSP90AB1/ATAD5/FOXA1/LSM10/PRKCA/KIF20B/PRKACA/PLRG1…	73
GO:0090084	negative regulation of inclusion body assembly	08/2033	11/17913	3.26650349437421e-06	0.000405472498975581	0.000358418404016575	DNAJB6/DNAJB1/HSPA1A/HSPA1B/SORL1/SACS/DNAJB2/HSF1	8
GO:0006611	protein export from nucleus	39/2033	163/17913	4.31012777594002e-06	0.00049221659201235	0.000435096056539629	SMG7/XPO6/UPF3B/WDR33/XPOT/THOC5/DDX19B/HNRNPA2B1/EIF4E/RAE1/UPF2/BAG3/EMD/NUP98/U2AF1L4/NUP205/UPF1/DDX39A/GSK3B/XPO5/PABPN1/MDM2/THOC7/AGFG1/MAGOH/SEH1L/SMG6/XPO1/SRSF4/NUP133/TSC1/SRSF3/SMG5/PRKACA/RBM8A/SRSF9/HSPA9/NUP153/RIOK2	39
GO:0071166	ribonucleoprotein complex localization	31/2033	117/17913	4.42069341348738e-06	0.000494944301784568	0.000437507222242972	SMG7/UPF3B/WDR33/XPOT/THOC5/DDX19B/HNRNPA2B1/EIF4E/RAE1/UPF2/NUP98/U2AF1L4/NUP205/UPF1/DDX39A/PABPN1/THOC7/AGFG1/MAGOH/SEH1L/SMG6/XPO1/SRSF4/NUP133/TSC1/SRSF3/SMG5/RBM8A/SRSF9/NUP153/RIOK2	31
GO:0010498	proteasomal protein catabolic process	72/2033	382/17913	9.63681432939885e-06	0.000994745169113239	0.000879307417439023	SUMO2/CDC23/AURKB/UBE2D3/NUPR1/ZFAND2A/CUL4A/PMAIP1/RAD23A/PSMD5/NEDD4L/RNF41/ANAPC1/FBXW7/BTRC/PSMC4/COMMD1/TMUB1/DDA1/TRIM13/HSPA1A/AGAP3/TREM2/PML/RNF4/KCTD10/GSK3B/FBXO22/AURKA/PSMD6/GET4/PPP2R5C/SUMO1/TMEM67/TLK2/CUL4B/DNAJB2/MDM2/FAM192A/FOXRED2/RHBDD1/ANAPC10/WWTR1/PSMC1/PSMD11/PSMD12/PSMD8/PSMB6/PSMB3/PSMB2/PSMA3/PSMA5/PSMA6/ANAPC15/DDRGK1/SCO1/TBL1X/DDIT3/HSP90AB1/UBQLN1/MAPK9/SGTA/PRKAC…	72
GO:0031503	protein-containing complex localization	50/2033	238/17913	1.13484967588351e-05	0.00113684064022716	0.00100491305556074	SMG7/UPF3B/WDR33/XPOT/THOC5/DDX19B/HNRNPA2B1/OPHN1/EIF4E/HNRNPU/RAE1/SNAP47/RPGR/UPF2/HRAS/RAB8A/NUP98/FKBP4/U2AF1L4/NUP205/UPF1/DYNC2LI1/DDX39A/MZT1/PABPN1/STX7/TERF1/THOC7/AGFG1/TTC21B/MAGOH/ITGB3/SEH1L/GRASP/SMG6/XPO1/SRSF4/NUP133/TSC1/TNPO1/SRSF3/SMG5/KIFAP3/RBM8A/SSNA1/EZR/SRSF9/DYNLL1/NUP153/RIOK2	50
GO:0070507	regulation of microtubule cytoskeleton organization	39/2033	170/17913	1.24784793033654e-05	0.00120766299698672	0.00106751665048416	APC/XRCC3/NPM1/HNRNPU/RAE1/ATF5/CLASP1/TRIM37/RASSF1/MECP2/SMC3/HSPA1A/HSPA1B/FKBP4/CLIP3/RNF4/GSK3B/SKA3/AURKA/TMEM67/CHORDC1/RBM14/MAP2/CHEK1/SPAST/CAMSAP2/KAT2B/KIF18A/XPO1/NSFL1C/MID1/BORA/PRKAA1/CLASP2/MDM1/PRUNE1/PAFAH1B1/RANGRF/CLTC	39
GO:0034605	cellular response to heat	30/2033	117/17913	1.26949685374482e-05	0.00120813783914715	0.00106793638836954	HDAC2/NF1/DNAJB6/THBS1/RAE1/CLPB/DNAJB1/EP300/BAG3/HSPA1A/HSPA1B/HSP90AA1/NUP98/FKBP4/NUP205/GSK3B/SUMO1/BAG1/RPTOR/CHORDC1/SEH1L/NUP133/HSP90AB1/PRKACA/DNAJC7/HSPH1/HSBP1/IRAK1/NUP153/HSF1	30
GO:0034329	cell junction assembly	46/2033	214/17913	1.35260565364824e-05	0.00124570617456959	0.00110114501005828	MARVELD2/ZNF703/LSR/PARD3/APC/PPM1F/OCLN/OPHN1/THBS1/SDC4/TJP1/PDPK1/CLASP1/PKP4/ITGB1BP1/CAPZA1/RAPGEF2/FMN1/MPP5/S100A10/BCL2/ECT2/HEG1/EPB41L5/CORO1C/SORBS1/GREM1/GRHL2/PRKCI/VCL/PTEN/GJB2/PKP2/ACTN4/RUNX1/TSC1/AJUBA/PRKCH/CLASP2/PRKCA/PRKACA/LIMCH1/CRB3/ARHGEF7/FERMT2/CDC42	46
GO:0043547	positive regulation of GTPase activity	65/2033	339/17913	1.46425550421848e-05	0.00130639045766993	0.00115478703005388	TIAM2/ERBB2/ALS2/RSU1/SYDE2/NEDD9/RASGRP1/ARHGAP20/SIPA1L2/ARAP2/F2R/NF1/OPHN1/DNM1L/ANKRD27/ARHGAP19/RABEP1/RIC8A/PKP4/GDI1/NPRL3/ZC3H15/STARD13/ARHGAP17/RAPGEF2/MAPRE2/HRAS/AGAP3/NET1/BNIP2/RASA4B/ARHGDIA/RIN2/RGS16/CHN1/CHML/FAM13B/S100A10/CCR7/GSK3B/GNAQ/RASA1/RASGRF1/RANBP1/ECT2/ARHGAP5/DENND1B/CORO1C/ARFGEF1/AGFG1/GIT2/ICAM1/CRKL/DOCK7/RGS4/TSC1/RAP1GAP2/SYDE1/RASAL2/RASGRP3/ARHGEF7/MYO9B/I…	65
GO:0006353	DNA-templated transcription, termination	21/2033	69/17913	1.55773878853396e-05	0.00136841361269675	0.00120961254915309	GTF2H3/WDR33/POLR2F/ZNRD1/POLR1E/DHX9/PABPN1/CSTF2/GTF2H1/CCNH/ZNF473/TAF1A/POLR1B/POLR2H/LSM10/CPSF7/SNRPG/SNRPF/SNRPB/ERCC2/SNRPD3	21
GO:0000075	cell cycle checkpoint	43/2033	197/17913	1.71855953062502e-05	0.00148681438179831	0.00131427319766299	MAD2L2/CNOT4/AURKB/APC/XRCC3/TIPRL/THOC5/CUL4A/CNOT7/ZWINT/E2F4/CDC14B/ZW10/CNOT9/EP300/NDC80/TIPIN/HRAS/NBN/HINFP/PML/ATF2/RAD17/NABP1/ZWILCH/AURKA/CDC25C/VPS4A/NSUN2/MDM2/CHEK1/MUC1/CNOT6/HUS1/ANAPC15/PEA15/CDKN2B/E2F8/DYNC1LI1/DTL/CEP63/PRMT1/DONSON	43
GO:0000209	protein polyubiquitination	57/2033	288/17913	1.87030917084754e-05	0.00153308187510991	0.00135517146117652	UBE3D/RC3H2/CDC23/UBE2E3/MARCH8/UBE3A/TRIP12/UBE2D3/TPP2/PSMD5/NEDD4L/RNF41/ANAPC1/FBXO21/FBXW7/BTRC/PSMC4/RBBP6/FBXL16/RNF4/UBE2D4/FBXW2/FBXO22/BCL2/PSMD6/FBXL13/UNKL/HERC5/NMI/FBXO17/ANAPC10/PSMC1/PSMD11/PSMD12/PSMD8/PSMB6/PSMB3/PSMB2/PSMA3/PSMA5/PSMA6/RNF115/TRIM44/DTL/OTUB1/RLIM/FBXL20/UBE2H/UBE2N/UBE2E1/UBE2A/UBE2D1/UBE2B/TRAF2/RNF216/PSMD13/RMND5A	57
GO:0038061	NIK/NF-kappaB signaling	40/2033	179/17913	1.8751125120886e-05	0.00153308187510991	0.00135517146117652	RC3H2/MIR29B2/TMSB4X/PSMD5/BTRC/TRAF4/PSMC4/RELB/EP300/RTKN2/PTP4A3/TREM2/TERF2IP/MAP3K14/ADIPOR1/PSMD6/ZC3H12A/PPM1B/GREM1/PSMC1/PSMD11/PSMD12/PSMD8/EGFR/PSMB6/PSMB3/PSMB2/PSMA3/PSMA5/PSMA6/MALT1/TLR4/IKBKE/ACTN4/TRIM44/NFKB2/COPS8/TRAF2/IRAK1/PSMD13	40
GO:0043087	regulation of GTPase activity	75/2033	410/17913	1.87943487316452e-05	0.00153308187510991	0.00135517146117652	TIAM2/ERBB2/ALS2/RSU1/SYDE2/NEDD9/RASGRP1/ARHGAP20/SIPA1L2/ARAP2/F2R/NF1/OPHN1/DNM1L/ANKRD27/ARHGAP19/RABEP1/BCL6/RIC8A/PKP4/GDI1/NPRL3/ITGB1BP1/ZC3H15/STARD13/ARHGAP17/TRAPPC6B/RAPGEF2/MAPRE2/HRAS/AGAP3/NET1/BNIP2/RASA4B/ARHGDIA/RIN2/RGS16/SPRY2/CHN1/CHML/FAM13B/S100A10/SBF1/CCR7/GSK3B/GNAQ/RASA1/RASGRF1/RANBP1/ECT2/ARHGAP5/DENND1B/CDC42SE1/CORO1C/ARFGEF1/AGFG1/GIT2/ICAM1/CRKL/DOCK7/RGS4/TSC1/AJ…	75
GO:0032886	regulation of microtubule-based process	43/2033	199/17913	2.22832449850906e-05	0.00176718512312316	0.00156210759800453	ERBB2/APC/XRCC3/NPM1/HNRNPU/RAE1/RHOT1/ATF5/CLASP1/TRIM37/RASSF1/MECP2/SMC3/HSPA1A/HSPA1B/FKBP4/CLIP3/RNF4/GSK3B/SKA3/AURKA/TMEM67/MEMO1/CHORDC1/RBM14/TTC21B/MAP2/CHEK1/SPAST/CAMSAP2/KAT2B/KIF18A/XPO1/NSFL1C/MID1/BORA/PRKAA1/CLASP2/MDM1/PRUNE1/PAFAH1B1/RANGRF/CLTC	43
GO:0006521	regulation of cellular amino acid metabolic process	19/2033	61/17913	2.72395656598985e-05	0.00204655157786869	0.00180905425677581	ODC1/OAZ2/PSMD5/PSMC4/PSMD6/PSMC1/PSMD11/PSMD12/PSMD8/AZIN1/PSMB6/PSMB3/PSMB2/PSMA3/PSMA5/PSMA6/COMT/OAZ1/PSMD13	19
GO:0000226	microtubule cytoskeleton organization	81/2033	460/17913	3.65045021690654e-05	0.00267231676135082	0.00236220091633831	FIGN/BCCIP/AURKB/KIF19/APC/XRCC3/HTT/NPM1/CNP/CROCC/E2F4/HNRNPU/MISP/RAE1/ZW10/ATF5/CLASP1/TRIM37/MAP7D3/TUBB/RASSF1/MECP2/ULK4/SMC3/NDC80/DNAL1/HSPA1A/CETN3/HSPA1B/MYBL2/FKBP4/C2CD3/CLIP3/RNF4/SPRY2/DNAAF2/GAPDH/GSK3B/SKA3/HAUS2/AURKA/TMEM67/CHORDC1/KATNA1/RBM14/TUBGCP3/SBDS/MAP2/CHEK1/NTMT1/KIF2A/FER/SPAST/CAMSAP2/KAT2B/KIF23/KIF18A/PEX14/XPO1/DOCK7/HAUS8/NSFL1C/MID1/KPNB1/BORA/RP1/PRKAA1/CLASP…	81
GO:1903706	regulation of hemopoiesis	82/2033	468/17913	3.92391100844178e-05	0.0028361432731902	0.00250701576088985	ERBB2/GNAS/RC3H2/CNOT4/KMT2E/RASGRP1/CTR9/CUL4A/NF1/PSMD5/DPY30/IL7R/THBS1/RNF41/BCL6/MIR17HG/PURB/YAP1/SH3RF1/FBXW7/HAX1/PSMC4/TFE3/EP300/STAT3/HSPA1A/HSPA1B/LOXL3/NFATC2/BTK/TOX/TREM2/ACVR1B/GABPA/HIST1H3I/HIST1H3C/HMGB3/PSMD6/DROSHA/PRELID1/MEF2C/ZC3H12A/BGLAP/N4BP2L2/PTPN2/MDK/PSMC1/FANCA/ETS1/PSMD11/PSMD12/PSMD8/ZBTB1/PSMB6/PSMB3/PSMB2/PSMA3/PSMA5/PSMA6/MALT1/KAT2B/TLR4/HDAC1/ARNT/IRF7/ZFP36…	82
GO:0048863	stem cell differentiation	48/2033	237/17913	4.52510518369206e-05	0.00319271459869554	0.00282220785339573	OVOL2/KBTBD8/PSMD5/HNRNPU/TGFB2/ZNF281/YAP1/MSI2/PSMC4/STAT3/TCOF1/PSMD6/FGFR2/TEAD2/GBX2/CORO1C/MEF2C/TBX2/CDK12/EPCAM/GREM1/CHD2/N4BP2L2/GATA6/PSMC1/RBM24/PSMD11/PSMD12/PSMD8/PSMB6/PSMB3/PSMB2/PSMA3/PSMA5/PSMA6/RUNX1/REST/NRG1/FOXA1/ACVR1/KDM4C/KLHL12/LBH/PEF1/ERCC2/HSPA9/PSMD13/A2M	48
GO:1904872	regulation of telomerase RNA localization to Cajal body	09/2033	18/17913	5.71917864475296e-05	0.00377444051788813	0.0033364258979212	PARN/CCT8/RUVBL1/NHP2/CCT2/CCT7/DKC1/TCP1/NOP10	9
GO:0032392	DNA geometric change	23/2033	86/17913	6.23259819699335e-05	0.00399866693312719	0.00353463138433863	GTF2H3/MCM9/G3BP1/CUL4A/RUVBL1/HNRNPA2B1/WRN/NBN/RAD51/HMGB3/HMGA1/DHX9/MCM7/CUL4B/GTF2H1/RAD54B/CHD2/GINS2/RTEL1/FANCM/SMARCA1/DDX11/ERCC2	23
GO:0061077	chaperone-mediated protein folding	13/2033	35/17913	6.58383163292739e-05	0.00404923684734519	0.00357933278330172	ERO1A/PPID/PDCD5/DNAJB1/CCT2/FKBP4/BAG1/DNAJB2/CHORDC1/SGTA/DNAJC7/HSPH1/HSPB1	13
GO:0043624	cellular protein complex disassembly	41/2033	195/17913	6.59507927851318e-05	0.00404923684734519	0.00357933278330172	KIF19/MRPL47/APC/ERAL1/MTPN/CLASP1/DAP3/MRPL9/MRPS30/MRPL28/LIMA1/UPF1/MRPL10/MRPL52/MRPS10/MRPS18A/MRPL44/VPS4A/MRPS17/MRPL2/MRPL39/SPTB/MRPS34/MRRF/KIF2A/MRPL13/MRPS28/SPAST/MRPL42/KIF18A/PEX14/MTRF1L/MRPL49/MRPL22/MID1/TRMT112/MRPL30/CLASP2/SWAP70/MRPL18/MRPL38	41
GO:2000736	regulation of stem cell differentiation	28/2033	116/17913	7.83228272196812e-05	0.00465857649400395	0.00411796004954354	PSMD5/HNRNPU/TGFB2/YAP1/PSMC4/STAT3/PSMD6/TEAD2/CDK12/N4BP2L2/GATA6/PSMC1/RBM24/PSMD11/PSMD12/PSMD8/PSMB6/PSMB3/PSMB2/PSMA3/PSMA5/PSMA6/RUNX1/REST/KDM4C/LBH/HSPA9/PSMD13	28
GO:0090685	RNA localization to nucleus	09/2033	19/17913	9.77254488645584e-05	0.00543453801960952	0.00480387313190666	PARN/CCT8/RUVBL1/NHP2/CCT2/CCT7/DKC1/TCP1/NOP10	9
GO:0001783	B cell apoptotic process	10/2033	23/17913	9.80310711067917e-05	0.00543453801960952	0.00480387313190666	AURKB/BCL6/MIR17HG/BTK/SLC39A10/CRKL/PTEN/BCL2L11/TNFRSF21/BAK1	10
GO:0070841	inclusion body assembly	10/2033	23/17913	9.80310711067917e-05	0.00543453801960952	0.00480387313190666	DNAJB6/TRIM37/DNAJB1/BAG3/HSPA1A/HSPA1B/SORL1/SACS/DNAJB2/HSF1	10
GO:0036294	cellular response to decreased oxygen levels	44/2033	220/17913	0.000124546865557885	0.00669381192027072	0.00591701136652191	ERO1A/NAMPT/PMAIP1/PSMD5/TBL2/DNM1L/GNGT1/NKX3-1/PSMC4/EPAS1/EP300/CITED2/BCL2/PSMD6/ANKRD1/CUL2/DDAH1/MDM2/ICAM1/GATA6/PSMC1/PSMD11/PSMD12/PSMD8/KCNK2/EIF4EBP1/PSMB6/PSMB3/PSMB2/PSMA3/PSMA5/PSMA6/PTEN/ATF4/ARNT/TSC1/CYBB/UBQLN1/AJUBA/PRKAA1/STC2/FMN2/IRAK1/PSMD13	44
GO:0070585	protein localization to mitochondrion	29/2033	125/17913	0.000125435704985809	0.00669381192027072	0.00591701136652191	CSNK2A2/TIMM29/UBE2D3/PMAIP1/HSPA4/TIMM13/DNM1L/PDCD5/FBXW7/HAX1/BAG3/HSP90AA1/ATG13/HK2/BCL2/TIMM23/TIMM17A/HPS4/PAM16/TIMM44/PARL/BID/PPP3CC/MFF/BCL2L11/YWHAH/DDIT3/PRKAA1/MOAP1	29
GO:0034599	cellular response to oxidative stress	55/2033	296/17913	0.000152903076379013	0.00759197014021012	0.00671094051475851	RHOB/OXR1/ERO1A/MIR29B2/HDAC2/KLF2/MAPKAP1/PDGFD/FBXW7/EPAS1/HSPA1A/AGAP3/HSPA1B/NET1/BTK/TXNRD2/PML/CYCS/IL6/WNT16/BCL2/GSR/ECT2/FANCC/MDM2/ZC3H12A/PRDX3/TPM1/FER/ETS1/EGFR/DHFR/TLR4/ATF4/GJB2/ARNT/CBX8/REST/TSC1/PRR5L/CYBB/UBQLN1/MAPK9/FANCD2/PRKAA1/NCOA7/AKR1C3/TRAF2/RAD52/BRF2/HSPB1/ETV5/TRPM2/ANKRD2/HSF1	55
GO:0007005	mitochondrion organization	79/2033	466/17913	0.000164851399809189	0.00793712334400189	0.00701603953073814	HRK/CSNK2A2/MIR29A/MIR29B2/TIMM29/CLUH/UBE2D3/ADGRG6/MTFR1/HTT/PMAIP1/CNP/HSPA4/NDUFA12/PANK2/TIMM13/DNM1L/RNF41/PDCD5/CHCHD3/RHOT1/GGCT/NDUFA8/FBXW7/HAX1/TMEM126B/FNIP2/EPAS1/STAT3/BAG3/HSPA1A/HSP90AA1/BCS1L/ATG13/ATG3/TREM2/HK2/ATF2/CYCS/GABPA/GABPB1/GSK3B/BCL2/PRELID1/TIMM23/TIMM17A/CDC37/NDUFAF1/INF2/HPS4/PAM16/TIMM44/COX20/PRDX3/AIFM2/PARL/BID/ALAS1/SLC25A33/PPP3CC/UQCC2/MFF/BCL2L11/SCO1/YWH…	79
GO:1903829	positive regulation of cellular protein localization	58/2033	318/17913	0.000172172505032481	0.00812483474161543	0.0071819674783014	ERBB2/CSNK2A2/PARP9/CCT8/APC/UBE2D3/PMAIP1/OAZ2/CROCC/CNST/PDCD5/PDPK1/FBXW7/ITGB1BP1/VAMP2/BAG3/NDC80/HRAS/EMD/SSH1/CCT2/ATG13/CCT7/CLIP3/TREM2/GSK3B/BCL2/ECT2/SORL1/DKC1/SORBS1/TCP1/MDM2/ZC3H12A/HPS4/BID/EGFR/PPP3CC/PRKCI/DDRGK1/MFF/ZFAND1/YWHAH/KIF5B/HSP90AB1/PRR5L/PRKCH/PRKAA1/KIF20B/PRKACA/PLS1/TRIM8/EPB41/EZR/OAZ1/RANGRF/ITGB1/RIOK2	58
GO:0050851	antigen receptor-mediated signaling pathway	44/2033	224/17913	0.000190546362952037	0.00884568888175718	0.00781916825293127	RC3H2/CD300A/PSMD5/NCK1/PDPK1/BTRC/PSMC4/EIF2B2/PAG1/HRAS/NFATC2/BTK/NFKB1/CCR7/BCL2/PSMD6/SLA2/RFTN1/DENND1B/MEF2C/ZC3H12A/EIF2B5/PTPN2/PSMC1/PSMD11/PSMD12/PSMD8/CRKL/PSMB6/PSMB3/PSMB2/PSMA3/PSMA5/PSMA6/MALT1/TNFRSF21/RUNX1/PRKD2/PRKCH/RIPK2/UBE2N/TXK/EZR/PSMD13	44
GO:0070059	intrinsic apoptotic signaling pathway in response to endoplasmic reticulum stress	17/2033	59/17913	0.000207517439305373	0.00940416332090224	0.00831283309498133	ERO1A/PMAIP1/NCK1/HSPA1A/PML/BCL2/CHAC1/SERINC3/PPP1R15A/PTPN2/BCL2L11/ATF4/DDIT3/BAK1/TRIB3/TRAF2/GRINA	17
GO:0035303	regulation of dephosphorylation	41/2033	206/17913	0.000231872582126366	0.0102234717079469	0.00903706274119375	MTMR1/CNEP1R1/SMG7/MFHAS1/TIPRL/FKBP1A/HTT/CD300A/CNST/TGFB2/SPRED1/PTPA/CSRNP2/CD2BP2/PPP2R2D/CDCA2/CAMTA1/NSMF/MTMR2/SLC39A10/PPP1R14B/GSK3B/PPP2R5C/PPP1R15A/MEF2C/STYXL1/LMTK2/SMG6/PPME1/TSC1/HSP90AB1/SMG5/PPP2R2A/PPP2R3A/RRP1B/SWAP70/PPP4R1/ARPP19/PPP2R3C/URI1/RCAN1	41
GO:0006986	response to unfolded protein	34/2033	161/17913	0.000243860978044973	0.0104695201852391	0.00925455789256545	ERO1A/GFPT1/CTDSP2/HSPD1/HSPA4/THBS1/TBL2/NCK1/DNAJB1/EP300/BAG3/HSPA4L/GOSR2/HSPA1A/HSP90AA1/CHAC1/ATF3/PPP1R15A/DNAJB2/RHBDD1/PTPN2/BCL2L11/ASNS/ATF4/DDIT3/HSP90AB1/HDGF/TSPYL2/BAK1/STC2/HSPH1/DDX11/HSPB1/HSF1	34
GO:0071826	ribonucleoprotein complex subunit organization	43/2033	221/17913	0.000277832088023477	0.0116648619309857	0.0103111831429766	ZRSR2/G3BP1/SNU13/CNOT7/NPM1/ERAL1/GEMIN2/PSIP1/CD2BP2/CRNKL1/HSP90AA1/GCFC2/MPV17L2/ATXN2/WDR77/DHX9/SF3A3/NOCT/SBDS/STYXL1/MRRF/CLNS1A/EIF3C/CNOT6/ZFAND1/KIF5B/HSP90AB1/MRTO4/TGS1/CPSF7/PRKAA1/SRSF10/PLD6/ATXN2L/SNRPG/SNRPF/SNRPB/SNRPC/EIF3J/SRSF9/PTBP2/NUFIP1/SNRPD3	43
GO:1902237	positive regulation of endoplasmic reticulum stress-induced intrinsic apoptotic signaling pathway	06/2033	10/17913	0.000296834391203346	0.0121937005307274	0.0107786513125335	PMAIP1/NCK1/SERINC3/PTPN2/BCL2L11/DDIT3	6
GO:0032606	type I interferon production	28/2033	125/17913	0.000303846214668977	0.0123925848982847	0.0109544556341184	POLR3C/G3BP1/HSPD1/POLR2F/RELB/EP300/POLR3F/NFKB1/PQBP1/MMP12/POLR3K/DHX9/HERC5/NMI/PPM1B/TLR4/POLR3H/IKBKE/IRF7/CRCP/POLR2H/OTUD5/NFKB2/AZI2/RIPK2/RNF216/IRF3/IRAK1	28
GO:0008637	apoptotic mitochondrial changes	27/2033	119/17913	0.000310338791914176	0.01247911621007	0.0110309451981354	HRK/MIR29A/MIR29B2/PMAIP1/DNM1L/PDCD5/RHOT1/GGCT/HSPA1A/ATG3/HK2/ATF2/GSK3B/BCL2/PRELID1/PAM16/AIFM2/BID/PPP3CC/MFF/BCL2L11/YWHAH/MOAP1/SLC25A4/BAK1/STPG1/PPP2CB	27
GO:0033135	regulation of peptidyl-serine phosphorylation	27/2033	119/17913	0.000310338791914176	0.01247911621007	0.0110309451981354	MAD2L2/MAPKAP1/PPM1F/PFN2/NCK1/HAX1/FNIP2/CNOT9/HSP90AA1/CNKSR3/TERF2IP/SPRY2/PAQR3/IL6/BCL2/AXIN1/RPTOR/EGFR/NSD1/DMD/DOCK7/PRKD2/HSP90AB1/PRKAA1/ARAF/RIPK2/BAK1	27
GO:0001701	in utero embryonic development	60/2033	342/17913	0.000391770424690291	0.0149133941665438	0.013182731132561	ALS2/TAF8/OVOL2/KLF2/GNA13/SPINT2/CTR9/CUL4A/C6/DNAJB6/BMP5/RIC8A/PSMC4/EPAS1/RBBP6/NBN/EIF4E2/PTCH1/HINFP/C2CD3/ACVR1B/GABPA/PEMT/FOXD3/WDR74/FGFR2/HEG1/KIDINS220/CHD7/EPB41L5/EMG1/SF3B6/SBDS/MAFG/PTPRR/GRHL2/RSPO3/EIF2S2/GATA6/TPM1/EGFR/SLC39A1/MAP2K1/BCL2L11/ARNT/E2F8/ACVR1/RRP7A/KDM4C/SENP2/MGAT1/UBE2A/UBE2B/APBA3/SLC30A1/ERCC2/PRMT1/ITGB1/HSF1/NCAPG2	60
GO:0001837	epithelial to mesenchymal transition	30/2033	140/17913	0.000424040678868396	0.0157225472489516	0.0138979839724809	MAD2L2/ZNF703/OVOL2/MIR29B2/HDAC2/KBTBD8/TGFB2/BMP5/CLASP1/LOXL3/TCOF1/IL6/WNT16/GSK3B/ADIPOR1/FGFR2/EPB41L5/GREM1/WWTR1/MDK/USF3/PTEN/TRIM62/FOXA1/ACVR1/CLASP2/KLHL12/PEF1/EFNA1/HEYL	30
GO:0032481	positive regulation of type I interferon production	19/2033	74/17913	0.000463302488991773	0.0166380956738555	0.0147072852347935	POLR3C/HSPD1/POLR2F/EP300/POLR3F/NFKB1/PQBP1/MMP12/POLR3K/DHX9/TLR4/POLR3H/IRF7/CRCP/POLR2H/NFKB2/RIPK2/IRF3/IRAK1	19
GO:0030705	cytoskeleton-dependent intracellular transport	32/2033	154/17913	0.000493445240644565	0.0173294320370387	0.0153183936985161	RAB21/MREG/RASGRP1/HTT/HNRNPU/KLC3/RHOT1/RPGR/TUBB/BAG3/DST/ARL8B/AP3S2/DYNC2LI1/TTC21B/MAP2/AP3S1/SPAST/KIF23/PEX14/ACTN4/KIF5C/KIF5B/TNPO1/KIFAP3/SSNA1/KIF1C/DYNLL1/HSPB1/PAFAH1B1/CDC42/MYO19	32
GO:0010719	negative regulation of epithelial to mesenchymal transition	11/2033	32/17913	0.000521116574413602	0.017925154457239	0.015844983984231	MAD2L2/OVOL2/MIR29B2/TGFB2/BMP5/ADIPOR1/USF3/PTEN/TRIM62/FOXA1/EFNA1	11
GO:0046685	response to arsenic-containing substance	11/2033	32/17913	0.000521116574413602	0.017925154457239	0.015844983984231	ZFAND2A/TNFRSF11B/CYP1A1/RNF4/RBM4/ATF3/ZC3H12A/ZFAND1/PTEN/ATF4/HSF1	11
GO:0070203	regulation of establishment of protein localization to telomere	06/2033	11/17913	0.000590246946167021	0.0198989626039054	0.0175897365076461	CCT8/CCT2/CCT7/DKC1/TCP1/TERF1	6
GO:0071347	cellular response to interleukin-1	32/2033	156/17913	0.000624196435337921	0.0207218700336019	0.0183171475363851	KLF2/RBMX/PSMD5/IL1RAP/FGG/NKX3-1/BTRC/PSMC4/UPF1/NFKB1/IL6/PSMD6/ANKRD1/ZC3H12A/ICAM1/PSMC1/PSMD11/PSMD12/PSMD8/PSMB6/PSMB3/PSMB2/PSMA3/AKAP12/PSMA5/PSMA6/OTUB1/USP10/RIPK2/UBE2N/IRAK1/PSMD13	32
GO:0060760	positive regulation of response to cytokine stimulus	15/2033	54/17913	0.000738577260838115	0.023560202007741	0.0208260980048148	PARP9/HSPA1A/HSPA1B/TREM2/MMP12/DHX9/TLR4/IKBKE/IRF7/TRIM44/LRRC70/RIPK2/TRAF2/TXK/PAFAH1B1	15
GO:0060218	hematopoietic stem cell differentiation	20/2033	83/17913	0.000802964505089304	0.0249772154410384	0.0220786704838748	PSMD5/YAP1/PSMC4/PSMD6/CHD2/N4BP2L2/PSMC1/PSMD11/PSMD12/PSMD8/PSMB6/PSMB3/PSMB2/PSMA3/PSMA5/PSMA6/RUNX1/ERCC2/HSPA9/PSMD13	20
GO:0000077	DNA damage checkpoint	28/2033	133/17913	0.000868613494292637	0.0266608487580156	0.0235669222591362	CNOT4/TIPRL/THOC5/CUL4A/CNOT7/E2F4/CDC14B/CNOT9/EP300/TIPIN/NBN/HINFP/PML/ATF2/RAD17/AURKA/CDC25C/MDM2/CHEK1/MUC1/CNOT6/HUS1/PEA15/E2F8/DTL/CEP63/PRMT1/DONSON	28
GO:0070482	response to oxygen levels	65/2033	389/17913	0.000884083663954795	0.0266608487580156	0.0235669222591362	ERO1A/HDAC2/ADSL/NAMPT/CDK4/NF1/PMAIP1/PSMD5/CYP1A1/THBS1/TBL2/TGFB2/DNM1L/GNGT1/PPARG/NKX3-1/MECP2/PSMC4/EPAS1/EP300/HK2/HSD11B2/PML/CITED2/BCL2/PSMD6/ANKRD1/CUL2/DDAH1/MDM2/ICAM1/GATA6/PSMC1/ETS1/PSMD11/PSMD12/PSMD8/KCNK2/EIF4EBP1/PSMB6/PSMB3/PSMB2/PSMA3/PSMA5/PSMA6/PTEN/ATF4/ARNT/ACTN4/REST/TSC1/CYBB/SCFD1/UBQLN1/AJUBA/PRKAA1/STC2/CREB1/POLB/FMN2/UCP2/ERCC2/IRAK1/PSMD13/HSF1	65
GO:0034976	response to endoplasmic reticulum stress	46/2033	254/17913	0.0008974515092306	0.0266608487580156	0.0235669222591362	ERO1A/GFPT1/NUPR1/CTDSP2/PMAIP1/THBS1/TBL2/NCK1/TMUB1/EP300/GOSR2/TRIM13/HSPA1A/PML/GSK3B/BCL2/RASGRF1/CHAC1/GET4/TMEM67/SERINC3/ATF3/PPP1R15A/NRBF2/UFM1/FOXRED2/RHBDD1/EIF2B5/PTPN2/DDRGK1/BCL2L11/ASNS/ATF4/DDIT3/UBQLN1/HDGF/SGTA/TMTC3/TSPYL2/BAK1/TRIB3/STC2/TRAF2/DDX11/GRINA/PPP2CB	46
GO:0007059	chromosome segregation	49/2033	275/17913	0.000902270981606243	0.0266608487580156	0.0235669222591362	MAD2L2/CSNK2A2/CDC23/CDCA5/AURKB/APC/PMF1/XRCC3/ZWINT/HNRNPU/STAG3/ZW10/CENPN/FBXW7/SMC3/HDAC8/CDCA2/NDC80/ARL8B/MKI67/SETDB2/POGZ/SKA3/ECT2/KLHDC8B/VPS4A/TLK2/NAA50/TERF1/PDS5A/SEH1L/NTMT1/NCAPG/ANAPC15/KIF23/KIF18A/NCAPH2/DYNC1LI1/KIF22/KPNB1/FANCD2/FANCM/WAPL/UBE2B/FMN2/DDX11/ERCC2/CDC42/RIOK2	49
GO:0120192	tight junction assembly	15/2033	55/17913	0.000910484327112615	0.0266608487580156	0.0235669222591362	MARVELD2/LSR/PARD3/APC/OCLN/TJP1/MPP5/ECT2/GRHL2/PRKCI/ACTN4/RUNX1/PRKCH/PRKACA/CRB3	15
GO:0006417	regulation of translation	66/2033	397/17913	0.000928858049626157	0.0269227383927176	0.0237984202402213	ERBB2/MIR29A/MIR29B2/KBTBD8/UPF3B/IGF2BP1/CDK4/TYMS/GUF1/NPM1/EIF4E/THBS1/PA2G4/PIWIL3/MTPN/NCK1/UNK/EIF2B2/KHSRP/STAT3/EIF4G2/ELAVL1/SAMD4A/NCL/EIF4E2/UPF1/HNRNPR/TCOF1/KLHL25/GAPDH/RPS6KB2/MPV17L2/EIF1/ATXN2/IL6/RBM4/DHX9/PPP1R15A/ZC3H12A/SEPSECS/MAGOH/LARP4/EIF2B5/RPUSD4/RBM24/DHFR/EIF3C/EIF4EBP2/EIF4EBP1/CNOT6/ILF3/UQCC2/DPH3/NGRN/ATF4/ZFP36/NGDN/LSM14B/TSC1/LARP1/MALSU1/RBM8A/CAPRIN1/PAIP2/D…	66
GO:0006626	protein targeting to mitochondrion	20/2033	84/17913	0.000943360532137158	0.0270682846155938	0.0239270761787764	CSNK2A2/TIMM29/UBE2D3/HSPA4/TIMM13/PDCD5/FBXW7/HAX1/BAG3/HSP90AA1/ATG13/TIMM23/TIMM17A/HPS4/PAM16/TIMM44/PARL/BID/MFF/PRKAA1	20
GO:0090559	regulation of membrane permeability	20/2033	84/17913	0.000943360532137158	0.0270682846155938	0.0239270761787764	MIR29A/MIR29B2/PMAIP1/CNP/RHOT1/STAT3/HSPA1A/HK2/ATF2/GSK3B/BCL2/HEG1/TJP2/BID/PPP3CC/BCL2L11/YWHAH/MOAP1/BAK1/STPG1	20
GO:0043371	negative regulation of CD4-positive, alpha-beta T cell differentiation	08/2033	20/17913	0.000970816507338791	0.0274423874104183	0.0242577652563288	RC3H2/BCL6/LOXL3/ZC3H12A/RUNX1/RUNX3/TNFSF4/ZBTB7B	8
GO:0060487	lung epithelial cell differentiation	08/2033	20/17913	0.000970816507338791	0.0274423874104183	0.0242577652563288	KLF2/YAP1/TMEM38B/GRHL2/GATA6/NFIB/FOXA1/CREB1	8
GO:0006979	response to oxidative stress	72/2033	442/17913	0.000996553279271769	0.0277576547543502	0.0245364465936233	ALS2/RHOB/OXR1/ERO1A/MIR29B2/UBE3A/HDAC2/KLF2/MAPKAP1/OGG1/NDUFA12/PDGFD/WRN/PSIP1/FBXW7/EPAS1/HSPA1A/AGAP3/HSPA1B/NET1/SRXN1/BTK/TXNRD2/PML/CYCS/CCR7/IL6/WNT16/BCL2/GSR/ECT2/LIAS/FANCC/MDM2/ZC3H12A/PRDX3/TPM1/FER/ETS1/EGFR/DHFR/TLR4/ATF4/GJB2/PON2/ARNT/CBX8/REST/TSC1/PRR5L/KPNA4/CYBB/UBQLN1/MAPK9/FANCD2/PRKAA1/NCOA7/OXSR1/BAK1/AKR1C3/STC2/TRAF2/RAD52/UCP2/BRF2/HSPB1/ERCC2/ETV5/TRPM2/ANKRD2/PPP2C…	72
GO:0010826	negative regulation of centrosome duplication	06/2033	12/17913	0.00106726224623155	0.0291390003429953	0.0257574903944441	NPM1/TRIM37/TMEM67/RBM14/KAT2B/MDM1	6
GO:0051131	chaperone-mediated protein complex assembly	07/2033	16/17913	0.00108338483429262	0.0291798462443907	0.0257935962285655	HSPD1/HSPA4/HSPA1A/HSP90AA1/CCT2/BBS10/HSP90AB1	7
GO:1901653	cellular response to peptide	61/2033	364/17913	0.00116295414808238	0.0308858985374438	0.0273016653123869	KLF2/ATP6V1E2/APC/NAMPT/CDK4/BAIAP2L1/NCK1/PPARG/PDPK1/VAMP2/STAT3/RAB8A/NFKB1/TREM2/GSK3B/STAT5A/ATP6V1D/ADIPOR1/UMODL1/ARID1B/BAIAP2/SORBS1/MDM2/ICAM1/MAX/BGLAP/AP3S1/PTPN2/PRKACB/FER/SLC25A33/EIF4EBP2/EIF4EBP1/SOCS2/KAT2B/TLR4/PRKCI/RHOQ/PTEN/BCL2L11/GJB2/MARS/BCL2L2/RAB10/ATP6V0E2/GRB14/PRKAA1/PPAT/PRKAR1B/PRKACA/RIPK2/GRB10/TRIB3/CREB1/PIK3C2A/UCP2/IRS1/DDX11/MBD5/HSF1/ZBTB7B	61
GO:0022618	ribonucleoprotein complex assembly	39/2033	209/17913	0.00119866095157134	0.0315408019975683	0.027880568822627	ZRSR2/G3BP1/SNU13/CNOT7/NPM1/ERAL1/GEMIN2/PSIP1/CD2BP2/CRNKL1/HSP90AA1/GCFC2/MPV17L2/ATXN2/WDR77/DHX9/SF3A3/NOCT/SBDS/STYXL1/CLNS1A/EIF3C/CNOT6/HSP90AB1/MRTO4/TGS1/CPSF7/PRKAA1/SRSF10/ATXN2L/SNRPG/SNRPF/SNRPB/SNRPC/EIF3J/SRSF9/PTBP2/NUFIP1/SNRPD3	39
GO:0035264	multicellular organism growth	30/2033	149/17913	0.00124101414995797	0.0320752797372134	0.0283530217236498	GNAS/RC3H2/KLF2/GPD2/CDK4/ATF5/SLC25A25/EP300/STAT3/RBBP6/PTCH1/ARID5B/PLAC8/STAT5A/BCL2/FGFR2/HEG1/CHD7/GRHL2/WWTR1/SOCS2/PLS1/STC2/CREB1/EZR/ERCC2/RAI1/STK40/MBD5/HSF1	30
GO:0140014	mitotic nuclear division	43/2033	237/17913	0.00124705991272528	0.0320752797372134	0.0283530217236498	MAD2L2/CDC23/CDCA5/BCCIP/AURKB/APC/XRCC3/ZWINT/HNRNPU/MISP/ZW10/CLASP1/SMC3/PPP2R2D/NDC80/HSPA1A/HSPA1B/MYBL2/MKI67/POGZ/AURKA/KLHDC8B/CDC25C/VPS4A/NAA50/PDS5A/CHEK1/SEH1L/NCAPG/KIF2A/SPAST/ANAPC15/KIF23/KIF18A/NCAPH2/DYNC1LI1/NSFL1C/KIF22/KPNB1/BORA/CLASP2/KIF20B/RIOK2	43
GO:0046902	regulation of mitochondrial membrane permeability	18/2033	74/17913	0.00127916233189398	0.0326072183710475	0.0288232301759006	MIR29A/MIR29B2/PMAIP1/CNP/RHOT1/STAT3/HSPA1A/HK2/ATF2/GSK3B/BCL2/BID/PPP3CC/BCL2L11/YWHAH/MOAP1/BAK1/STPG1	18
GO:0010970	transport along microtubule	29/2033	143/17913	0.00131932159413957	0.0333333022236149	0.0294650537675792	RAB21/MREG/RASGRP1/HTT/HNRNPU/KLC3/RHOT1/RPGR/BAG3/DST/ARL8B/AP3S2/DYNC2LI1/TTC21B/MAP2/AP3S1/SPAST/KIF23/PEX14/KIF5C/KIF5B/TNPO1/KIFAP3/SSNA1/KIF1C/DYNLL1/HSPB1/PAFAH1B1/CDC42	29
GO:0099111	microtubule-based transport	29/2033	143/17913	0.00131932159413957	0.0333333022236149	0.0294650537675792	RAB21/MREG/RASGRP1/HTT/HNRNPU/KLC3/RHOT1/RPGR/BAG3/DST/ARL8B/AP3S2/DYNC2LI1/TTC21B/MAP2/AP3S1/SPAST/KIF23/PEX14/KIF5C/KIF5B/TNPO1/KIFAP3/SSNA1/KIF1C/DYNLL1/HSPB1/PAFAH1B1/CDC42	29
GO:0070555	response to interleukin-1	35/2033	183/17913	0.00133969629462575	0.0336989684683393	0.0297882853361023	KLF2/RBMX/PSMD5/IL1RAP/FGG/NKX3-1/BTRC/PSMC4/UPF1/NFKB1/IL6/PSMD6/ANKRD1/ZC3H12A/ICAM1/PSMC1/ETS1/PSMD11/PSMD12/PSMD8/PSMB6/PSMB3/PSMB2/PSMA3/AKAP12/PSMA5/PSMA6/PRKCI/OTUB1/USP10/PRKCA/RIPK2/UBE2N/IRAK1/PSMD13	35
GO:0045088	regulation of innate immune response	71/2033	440/17913	0.00139093916806313	0.0343820893923831	0.0303921317423683	POLR3C/PSPC1/PARP9/MFHAS1/RASGRP1/UBE2D3/CNOT7/CD300A/NRAS/HSPD1/PSMD5/FGG/PPARG/PDPK1/BTRC/PSMC4/RELB/EP300/HSPA1A/HRAS/HSPA1B/USP18/POLR3F/BTK/NFKB1/PQBP1/MMP12/PSMD6/ANKRD17/TNIP1/RFTN1/SUMO1/DHX9/NMI/RBM14/CDC37/KRAS/PTPN2/PSMC1/PRKACB/PSMD11/PSMD12/PSMD8/MUC1/PSMB6/PSMB3/PSMB2/PSMA3/PSMA5/PSMA6/MALT1/ERBIN/TLR4/IKBKE/S100A14/IRF7/HSP90AB1/UBQLN1/ERAP1/PRKACA/RIPK2/UBE2N/UBE2D1/TXK/EPG5/PIK3C…	71
GO:1903076	regulation of protein localization to plasma membrane	21/2033	93/17913	0.00147073773006699	0.0354482059223234	0.0313345280482147	TMEM59/CNST/PDPK1/CLIP3/TREM2/VPS4A/SORBS1/STX7/VTI1B/EGFR/GRASP/PRKCI/RHOQ/KIF5B/PRKCH/PLS1/LYPD1/EZR/RANGRF/ITGB1/CLTC	21
GO:1903050	regulation of proteolysis involved in cellular protein catabolic process	37/2033	198/17913	0.00153571612325666	0.0363856392688611	0.0321631745403611	SUMO2/CSNK2A2/UBE3A/NUPR1/ZFAND2A/RAD23A/SUFU/FBXW7/BTRC/PSMC4/COMMD1/DDA1/HSPA1A/TREM2/PML/GSK3B/FBXO22/AURKA/AXIN1/SUMO1/TLK2/DNAJB2/MDM2/FAM192A/PSMC1/TRIM39/DDRGK1/PTEN/SCO1/HSP90AB1/UBQLN1/MAPK9/SGTA/PRKACA/TMTC3/ARAF/EFNA1	37
GO:0042176	regulation of protein catabolic process	59/2033	354/17913	0.00158262883605616	0.0370361092372158	0.0327381590547423	SUMO2/MAD2L2/CSNK2A2/UBE3A/APC/NUPR1/ZFAND2A/ODC1/OAZ2/RAD23A/SUFU/NEDD4L/RNF41/FBXW7/BTRC/PSMC4/COMMD1/DDA1/HSPA1A/HSP90AA1/TREM2/PML/GSK3B/FBXO22/SORL1/AURKA/AXIN1/ASB9/SUMO1/TLK2/CUL4B/DNAJB2/MDM2/FAM192A/PSMC1/AZIN1/EGFR/TRIM39/UQCC2/DDRGK1/PTEN/SCO1/XPO1/DTL/HSP90AB1/UBQLN1/FBXL20/MAPK9/NRG1/SGTA/PRKACA/TMTC3/ARAF/PHB/FMN2/EZR/OAZ1/SNX3/EFNA1	59
GO:0044068	modulation by symbiont of host cellular process	10/2033	31/17913	0.00162188803830896	0.0373426641078394	0.0330091389800147	KPNA5/GAPDH/CCNK/TNIP1/PABPN1/ZC3H12A/BCL2L11/KPNA4/KPNB1/ITGAV	10
GO:0030010	establishment of cell polarity	26/2033	126/17913	0.00176341521719593	0.0397988177477816	0.0351802619781754	CYTH3/PARD3/HTT/OPHN1/MISP/RNF41/ZW10/CLASP1/NDC80/HSP90AA1/SPRY2/MPP5/CCR7/GSK3B/ARFGEF1/MAP2/CRKL/PRKCI/DOCK7/NSFL1C/RAB10/HSP90AB1/KIF20B/PAFAH1B1/CDC42/GBF1	26
GO:0090069	regulation of ribosome biogenesis	06/2033	13/17913	0.0017924068150002	0.0401358545633379	0.0354781864929865	UTP15/NUDT16/PTEN/DIMT1/TRMT112/RIOK2	6
GO:1903025	regulation of RNA polymerase II regulatory region sequence-specific DNA binding	06/2033	13/17913	0.0017924068150002	0.0401358545633379	0.0354781864929865	TMSB4X/FBXW7/EP300/NSD1/DDRGK1/DDIT3	6
GO:0018107	peptidyl-threonine phosphorylation	22/2033	101/17913	0.00188180391118668	0.0416476757088214	0.0368145644803758	S1PR2/PARD3/SPRED1/PDPK1/ACVR1B/SPRY2/GSK3B/BCL2/AXIN1/RPTOR/CSNK2B/CHEK1/LMTK2/MAP2K1/PRKD2/ACVR1/PRKCA/PRKACA/SPRED2/RIPK2/OXSR1/VRK1	22
GO:0120193	tight junction organization	15/2033	59/17913	0.00197392701224108	0.0435178503470911	0.0384677099113839	MARVELD2/LSR/PARD3/APC/OCLN/TJP1/MPP5/ECT2/GRHL2/PRKCI/ACTN4/RUNX1/PRKCH/PRKACA/CRB3	15
GO:0042594	response to starvation	33/2033	174/17913	0.00208529709807005	0.0454467420991602	0.040172758478288	ADSL/WIPI2/PMAIP1/TBL2/WRN/PPARG/NPRL3/ITFG2/DSC2/TBC1D5/SLC38A2/FBXO22/BCL2/ATF3/ZC3H12A/MAX/SEH1L/EIF4EBP1/COMT/ASNS/ATF4/MARS/ZFP36/DDIT3/PRKAA1/LARP1/RRAGD/FOXK1/AKR1C3/MYBBP1A/PIK3C3/UCP2/NUAK2	33
GO:1905475	regulation of protein localization to membrane	34/2033	181/17913	0.00212671645981976	0.0457926985589718	0.0404785675343847	ERBB2/TMEM59/PMAIP1/CNST/PDCD5/PDPK1/GDI1/ITGB1BP1/HRAS/SSH1/CLIP3/TREM2/BCL2/VPS4A/SORBS1/STX7/VTI1B/BID/EGFR/PPP3CC/CRKL/GRASP/PRKCI/MFF/RHOQ/YWHAH/KIF5B/PRKCH/PLS1/LYPD1/EZR/RANGRF/ITGB1/CLTC	34
GO:0006760	folic acid-containing compound metabolic process	09/2033	27/17913	0.00213325005546173	0.0457926985589718	0.0404785675343847	TYMS/MTHFD2L/MTRR/SLC25A32/MTHFS/GART/MTHFD1L/DHFR/SLC19A1	9
GO:0051348	negative regulation of transferase activity	47/2033	272/17913	0.00216877733702561	0.0460361286037779	0.0406937481159766	MAD2L2/MIR24-1/APC/GADD45B/PPM1F/CDKN2A/NF1/CD300A/NPM1/HNRNPU/DUSP7/SPRED1/NCK1/PPARG/PDPK1/ITGB1BP1/PAQR3/GPRC5A/GSK3B/GNAQ/DUSP4/SORL1/ADORA2A/HEG1/CORO1C/RPTOR/CHORDC1/TERF1/DUSP19/DUSP14/PRDX3/PTPN2/WWTR1/MLLT1/KAT2B/PTEN/PRKRIP1/ZFP36/CDKN2B/RGS4/AJUBA/GMFB/PRKAR1B/SPRED2/TRIB3/HSPB1/LATS2	47
GO:0048511	rhythmic process	49/2033	287/17913	0.00228456114244124	0.0476089201581733	0.0420840210449703	PSPC1/GFPT1/UBE3A/HDAC2/NAMPT/CDK4/NFYA/TYMS/CUL4A/TOP1/HNRNPU/TGFB2/DNM1L/PPARG/ATF5/FBXW7/BTRC/RELB/EP300/BTBD9/HES7/HNRNPR/PML/GSK3B/GNAQ/RBM4/ADORA2A/ADNP/GPR149/DHX9/NOCT/BMPR1B/MDK/ETS1/EGFR/KAT2B/HDAC1/PTEN/ATF4/CIPC/DTL/MAPK9/NFKB2/PRKAA1/NR1D2/CREB1/MYBBP1A/RAI1/KDM2A	49
GO:0031396	regulation of protein ubiquitination	36/2033	196/17913	0.00239495914590926	0.0490151137030174	0.0433270292572529	MAD2L2/UBE3A/TRIP12/CTR9/FKBP1A/DNM1L/CDC14B/FBXW7/NSMCE3/COMMD1/HDAC8/HSPA1A/HSPA1B/HSP90AA1/FANCI/AXIN1/DNAJB2/NMI/MALT1/SPRTN/PTEN/TRIM44/OTUB1/HSP90AB1/UBQLN1/MAPK9/FEM1A/FANCM/RIPK2/SENP2/TRIB3/UBE2N/UBE2D1/PEF1/ATG5/GTPBP4	36
GO:0051098	regulation of binding	60/2033	368/17913	0.00245496431435016	0.0495536512531411	0.0438030708376462	MAD2L2/PARP9/CDCA5/HDAC2/AURKB/TMSB4X/FKBP1A/NVL/MITD1/PPARG/NKX3-1/SUMO3/FBXW7/TRAF4/ITGB1BP1/HDAC8/RAPGEF2/EP300/S100A10/BTAF1/GSK3B/BCL2/SORL1/AURKA/SUMO1/ADNP/EPB41L5/DHX9/CSNK2B/DNAJB2/H1F0/MEF2C/RSF1/FAM192A/MAP2/MBD2/EIF3C/NSD1/DPH3/DDRGK1/PEX14/DDIT3/HSP90AB1/NRG1/PRKACA/RIPK2/WAPL/BAK1/SENP2/TRIB3/STPG1/TRAF2/EPB41/DOT1L/ARHGEF7/DDX11/ERCC2/PPP2CB/HSF1/GTPBP4	60

## Sheet: Table S4_KEGG_DOWN_DGEs
ID	Description	GeneRatio	BgRatio	pvalue	p.adjust	qvalue	geneID	Count	KEGG orthology
hsa05203	Viral carcinogenesis	46/945	204/8073	6.86427881092437E-06	0.00075738326857964	0.000602538712887746	55697/2967/7337/3066/1019/1029/5366/4893/718/3572/3018/85236/55869/2033/6774/3265/4790/1386/6776/8346/5902/8342/2965/4193/3845/1111/5700/5567/8900/8850/3065/468/3665/7533/81/1030/2958/4791/5566/578/1385/7186/5423/3661/998/2960	46	Cancer
hsa03013	RNA transport	43/945	186/8073	0.0000070097661091373	0.00075738326857964	0.000602538712887746	6613/10557/65109/11260/8563/11269/1977/8487/8480/6612/8892/26019/1973/1982/4928/9470/23165/5976/10209/7341/57510/80145/4116/8087/81929/8894/8893/1207/8663/1979/1978/55916/7514/55746/2521/3837/96764/9939/10940/59343/8669/9972/55308	43	Translation
hsa03040	Spliceosome	37/945	151/8073	7.49884424336278E-06	0.00075738326857964	0.000602538712887746	4809/27316/3192/6100/56259/9343/3303/51340/3304/10286/199746/10084/29896/11017/1665/10946/51639/4116/84844/10915/6626/6429/2521/84950/10772/6428/51690/9939/5356/6637/6636/6628/6631/8683/3183/6634/9410	37	Transcription
hsa03015	mRNA surveillance pathway	27/945	97/8073	0.0000108897620665187	0.000824899476538791	0.000656251450850732	9887/65109/55339/11269/26528/124540/26019/55844/5976/23708/5527/8106/1478/4116/55916/23293/2521/79869/23381/5520/5523/10767/9939/29101/55012/5516/55308	27	Translation
hsa01521	EGFR tyrosine kinase inhibitor resistance	23/945	79/8073	0.0000219152701303076	0.00132806536989664	0.00105654670733483	2064/4763/4893/1977/80310/56034/6774/3265/9470/6199/3569/2932/596/2263/3845/1956/1978/5604/5728/10018/3084/5578/369	23	Drug resistance: antineoplastic
hsa04530	Tight junction	37/945	162/8073	0.0000401614627911925	0.00202815387095522	0.00161350438231282	153562/2064/653857/56288/1019/100506658/3308/23327/7082/55114/9693/55844/4218/64398/51807/24146/7278/7277/57530/9414/5567/5584/81/861/84952/5601/5564/5562/5520/5566/8777/92359/7430/57826/998/3688/5516	37	Cellular community - eukaryotes
hsa03008	Ribosome biogenesis in eukaryotes	28/945	111/8073	0.0000544456283105943	0.00235671791115858	0.00187489456889114	1459/10557/10171/4809/55131/4931/5822/55651/6949/9790/84135/29102/1736/1460/10436/51119/28987/55505/10885/55916/7514/92856/84916/27341/9724/10940/23560/55781	28	Translation
hsa04218	Cellular senescence	35/945	156/8073	0.0000947102157281143	0.00358714942070233	0.00285376834233397	4616/90550/1019/1029/4893/5481/1875/1874/7042/8945/3265/4605/4683/4773/4790/3569/993/4193/3845/5606/1111/2113/8900/5533/1978/3364/10912/5604/5728/22808/1030/91860/5928/7248/291	35	Cell growth and death
hsa04120	Ubiquitin mediated proteolysis	32/945	140/8073	0.000129089638849274	0.0043460178412589	0.00345748857268816	8697/10477/7337/10054/9320/7323/8451/23327/64682/9616/4591/55294/8945/5371/9039/51619/23221/9063/8450/8453/89910/4193/10393/4281/389898/7328/7334/7324/7319/7321/7320/868	32	Folding, sorting and degradation
hsa04068	FoxO signaling pathway	30/945	131/8073	0.000200241825842676	0.00606732732303307	0.00482688190715502	10365/4616/4893/3575/7042/5170/604/23710/2033/6774/9456/901/3265/3569/26260/4193/3845/1956/10912/5604/5728/10018/1030/5601/5564/5562/369/3667/3276/80854	30	Signal transduction
hsa05213	Endometrial cancer	17/945	58/8073	0.000232449230980395	0.00640291972609633	0.00509386353057516	2064/1496/324/4616/4893/5170/3265/2932/8312/3845/2002/1956/10912/5604/5728/369/578	17	Cancer: specific types
hsa04211	Longevity regulating pathway	22/945	89/8073	0.000453447497912232	0.0106122006356944	0.00844257059431651	4893/1977/5468/3265/9470/9776/4790/1386/6199/51094/57521/3845/5567/1978/468/7248/5564/5562/5566/1385/3667/9474	22	Aging
hsa04910	Insulin signaling pathway	30/945	137/8073	0.000455308938165104	0.0106122006356944	0.00844257059431651	4893/1977/5170/3265/5261/9470/3099/6199/2932/10580/57521/3845/5567/2002/1399/1978/8835/5604/5584/23433/91860/7248/5601/5564/5562/5575/5566/369/3667/868	30	Signal transduction
hsa03050	Proteasome	14/945	46/8073	0.000534695320415273	0.0111776454781349	0.00889241207049812	5704/9861/11047/5700/5717/5718/5714/5694/5691/5690/5684/5686/5687/5719	14	Folding, sorting and degradation
hsa04213	Longevity regulating pathway - multiple species	17/945	62/8073	0.00055334878604628	0.0111776454781349	0.00889241207049812	3066/4893/81570/3303/3265/3304/6199/57521/3845/5567/1979/3065/5564/5562/5566/3667/9474	17	Aging
hsa05223	Non-small cell lung cancer	18/945	68/8073	0.000611421199244111	0.0114333760961569	0.00909585939211371	2064/4616/1019/1029/4893/6257/5170/11186/6774/3265/6776/3845/1956/10912/5604/5578/369/578	18	Cancer
hsa05215	Prostate cancer	23/945	97/8073	0.000641476546649067	0.0114333760961569	0.00909585939211371	2064/4893/80310/4824/5170/56034/2033/3265/3320/4790/2932/596/2263/4193/3845/1956/5604/5728/468/3326/369/1385/2119	23	Cancer
hsa05166	Human T-cell leukemia virus 1 infection	42/945	219/8073	0.000762568434639961	0.0124982987567213	0.00994306206457936	55697/8697/1019/1029/4893/7042/4801/64682/5971/2033/3265/4773/4790/1386/9020/3569/6776/5902/3845/3383/1111/10393/5567/2113/8900/2114/2002/5533/8850/5604/5728/468/7538/7514/1030/3601/5601/4791/291/5566/1385/5423	42	Infectious disease: viral
hsa04010	MAPK signaling pathway	53/945	294/8073	0.000783721704216844	0.0124982987567213	0.00994306206457936	2064/4616/10125/4763/4893/1849/3556/7042/80310/5971/56034/5321/9693/3303/3265/3304/4790/1386/9020/5921/5923/1846/2263/4208/5495/3845/5606/4149/5801/4216/5567/2002/1956/5533/1399/10912/5604/468/22808/1649/5601/4791/5578/5566/369/6196/7186/10746/25780/3315/3654/998/1942	53	Signal transduction
hsa04110	Cell cycle	27/945	124/8073	0.000942910998905367	0.013688755036048	0.0108901334141219	10459/8697/3066/4616/1019/1029/1875/1874/4999/7042/8555/64682/9126/2033/2932/993/995/4176/4193/1111/902/10393/8900/10912/3065/7533/1030	27	Cell growth and death
hsa05017	Spinocerebellar ataxia	30/945	143/8073	0.000963174154349105	0.013688755036048	0.0108901334141219	90550/4800/26100/5704/9776/54205/6311/2776/9861/29982/6315/5332/11047/5700/5717/5718/5714/5694/5691/5690/5684/5686/5687/5601/291/5578/11273/7186/5289/5719	30	Neurodegenerative disease
hsa04540	Gap junction	21/945	88/8073	0.000993903005917679	0.013688755036048	0.0108901334141219	2778/3358/84617/4893/7082/80310/203068/56034/3265/51807/2776/7278/7277/5332/3845/5567/1956/5604/5578/5566/10746	21	cellular community - eukaryotes
hsa04392	Hippo signaling pathway - multiple species	10/945	29/8073	0.00113913051293892	0.0150068063226301	0.0119387133850349	122786/7004/11186/10413/79633/8463/25937/55233/84962/26524	10	Signal transduction
hsa04066	HIF-1 signaling pathway	24/945	109/8073	0.00150690770403432	0.0189401876116427	0.0150679276118332	2064/229/1977/2033/6774/9470/4790/3099/2597/6199/3569/596/8453/1956/5214/1978/5604/7099/5209/405/1536/5578/3459/3939	24	Signal transduction
hsa04012	ErbB signaling pathway	20/945	85/8073	0.00156272175013553	0.0189401876116427	0.0150679276118332	2064/4893/4690/3265/6199/2932/6776/3845/145957/2002/1956/1399/1978/5604/27/5601/3084/5578/369/868	20	Signal transduction
hsa05210	Colorectal cancer	20/945	86/8073	0.00181777796932841	0.0204852314985703	0.0162970922813013	324/4616/5366/4893/7042/3265/2956/54205/6199/2932/596/8312/3845/1956/10912/5604/10018/5601/369/578	20	Cancer
hsa05010	Alzheimer disease	62/945	369/8073	0.00185361420167374	0.0204852314985703	0.0162970922813013	1459/84617/1537/324/90550/26100/4893/5481/55967/147700/4702/203068/5704/3265/9776/4790/54205/51807/2597/3569/51384/2932/2776/9861/8323/8312/7278/7277/1460/29982/5332/64837/3845/11047/5700/5717/5718/637/5714/5533/5694/5691/5690/5684/5686/5687/1131/5604/468/3800/3799/1649/91860/1536/122011/5601/291/369/7186/5289/3667/5719	62	Neurodegenerative disease
hsa05219	Bladder cancer	12/945	41/8073	0.00191990452513579	0.0204852314985703	0.0162970922813013	2064/1019/1029/4893/7057/11186/3265/4193/3845/1956/5604/369	12	Cancer
hsa00450	Selenocompound metabolism	7/945	17/8073	0.00198159641180573	0.0204852314985703	0.0162970922813013	51540/92935/10587/51091/22928/22929/4141	7	Metabolism of other amino acids
hsa03020	RNA polymerase	10/945	31/8073	0.0020282407424327	0.0204852314985703	0.0162970922813013	10623/5435/30834/10621/64425/51728/171568/84172/5437/5433	10	Transcription
hsa05014	Amyotrophic lateral sclerosis	61/945	364/8073	0.00214310469763342	0.0209471201091266	0.0166645492617336	57679/84617/1537/90550/26100/3181/55967/147700/8480/5217/4702/203068/5704/23710/83544/4218/4928/9776/127602/23165/54205/51807/84134/6311/596/9861/7278/7277/29982/64837/11047/5606/81929/145957/5700/5717/5718/637/5714/5533/5694/5691/5690/5684/5686/5687/55916/468/3800/3799/1649/55746/2521/29979/3084/6428/11273/7186/5289/5719/9972	61	Neurodegenerative disease
hsa04071	Sphingolipid signaling pathway	25/945	119/8073	0.00242025972970106	0.022347679084177	0.017778768491494	9294/10672/4893/5170/55844/3265/81537/4790/2776/596/5527/10558/5332/3845/637/5604/5728/5601/5520/5523/5578/7186/253782/55012/5516	25	Signal transduction
hsa05220	Chronic myeloid leukemia	18/945	76/8073	0.00243390564283116	0.022347679084177	0.017778768491494	3066/4616/1019/1029/4893/7042/3265/4790/6776/4193/3845/1399/10912/5604/3065/861/369/578	18	Cancer: specific types
hsa05016	Huntington disease	52/945	306/8073	0.00329903312182291	0.0294002069385983	0.023389429872986	84617/1537/3066/26100/3064/55967/147700/5435/5468/4702/203068/5704/2033/83544/9776/127602/54205/51807/2776/9861/7052/7278/7277/29982/5332/64837/11047/6875/5700/5717/5718/5714/5694/5691/5690/5684/5686/5687/3065/6507/3800/3799/5978/5437/5601/291/1385/7186/5289/5719/5433/1213	52	Neurodegenerative disease
hsa05169	Epstein-Barr virus infection	37/945	202/8073	0.00351259583825378	0.0304090439711684	0.0241920134424095	3066/4616/1019/4793/5704/5971/6774/695/4790/54205/9020/3569/596/9861/4193/11047/5606/3383/5700/8900/5717/5718/637/5714/10912/9641/3065/10018/3665/864/5601/4791/578/7186/3661/3654/5719	37	Infectious disease: viral
hsa04137	Mitophagy - animal	16/945	68/8073	0.00444052454349701	0.0373744149077665	0.0297333368555794	1459/4893/55288/7030/23710/3265/10370/1460/3845/468/22808/79735/5601/4286/23786/9474	16	Transport and catabolism
hsa04912	GnRH signaling pathway	20/945	93/8073	0.00478320155197166	0.0391705424391193	0.0311622519317642	2778/4893/5321/3265/2776/5332/3845/5606/4216/5567/2002/1956/5604/468/91860/5601/5578/5566/10746/998	20	Endocrine system
hsa04722	Neurotrophin signaling pathway	24/945	119/8073	0.00506842623076385	0.0404140302084591	0.032151512654984	4793/4893/5170/10818/3265/396/4790/6272/2932/596/57498/10782/3845/1399/5604/468/91860/11108/5601/8767/6196/3667/3654/998	24	Nervous system
hsa05131	Shigellosis	42/945	242/8073	0.00537398980307737	0.0417517669316011	0.0332157534387238	9265/7323/4793/26100/718/5481/5217/8945/23710/199746/4790/3099/54205/6199/2932/8354/8352/51619/596/10318/57521/4193/5332/1956/1399/10892/7099/7414/81/5601/58528/8767/389898/23048/7334/7321/7186/5289/3661/9474/998/3688	42	Infectious disease: bacterial
hsa04152	AMPK signaling pathway	24/945	120/8073	0.00565380952853775	0.0428276071786734	0.0340716416325038	5468/5170/55844/1994/4218/6199/51094/5527/57521/81617/8900/5214/1978/5209/7248/10890/5564/5562/5520/5523/1385/55012/3667/5516	24	Signal transduction
hsa05212	Pancreatic cancer	17/945	76/8073	0.00591332836048305	0.0437009388591797	0.0347664234801186	2064/4616/1019/1029/7042/6774/4790/6199/5888/3845/1956/10912/5604/5601/369/578/998	17	Cancer
hsa04919	Thyroid hormone signaling pathway	24/945	121/8073	0.00629413048891389	0.0454076556700216	0.0361242075679519	3066/90390/4893/9442/6257/5170/2033/3265/2932/4193/5332/3845/3690/5567/5214/8850/5604/3065/3685/5578/5566/23389/1734/1827	24	Endocrine system
hsa05020	Prion disease	46/945	273/8073	0.00648083421159915	0.0456672736305707	0.0363307474775081	1459/84617/1537/90550/729/55967/147700/4702/203068/5704/3303/3304/1386/54205/51807/3569/2932/9861/10963/7278/7277/1460/64837/11047/5700/5567/5717/5718/5714/5533/5694/5691/5690/5684/5686/5687/468/3800/3799/1649/1536/5601/291/5566/1385/5719	46	Neurodegenerative disease
hsa04150	mTOR signaling pathway	29/945	155/8073	0.00676078941278454	0.0465572543653117	0.0370387745341545	90423/79109/4893/1977/5170/8131/57600/3265/9470/6199/51384/2932/51382/8323/57521/3845/81617/81929/1978/5604/5728/23175/7248/5562/5578/58528/2887/6196/3667	29	Signal transduction

## Sheet: Table S5_BPs_UP_DGEs
ID	Description	GeneRatio	BgRatio	pvalue	p.adjust	qvalue	geneID	Count
GO:0043062	extracellular structure organization	79/1346	387/17913	1.66435477570171e-16	8.91428417865836e-13	8.40937149828233e-13	SCUBE1/ERO1B/COL5A1/DCN/ADAMTS4/ADAMTSL2/TNFRSF1B/NID1/CETP/FBLN1/FN1/TNC/COL3A1/COL4A3/SULF2/TIMP2/TIMP1/ICAM5/VWF/PDGFA/OLFML2A/COL4A6/LAMA4/SERPINF2/P3H4/ADAM19/COL8A1/COL9A3/SPOCK2/MMP15/COL6A1/MMP7/TNXB/SPARC/ABCA7/LAMC3/CCDC80/HSPG2/MFAP2/HYAL1/ADAM8/CARMIL2/HAS2/EMILIN1/FBLN5/ITGB2/ITGB4/EFEMP2/LOX/QSOX1/RGCC/MMP11/COL8A2/ADAM12/HTRA1/LAMA3/CFLAR/ADAMTSL4/NPNT/MMP2/ITGA11/FBLN2/COL5A2/PLTP…	79
GO:0002576	platelet degranulation	29/1346	128/17913	6.03270814657883e-08	0.000107703949443587	0.000101603505626591	CFD/FN1/DMTN/SERPING1/P2RX1/LAMP2/TIMP1/VWF/PDGFA/PCYOX1L/SERPINF2/F8/CLU/IGF1/SPARC/FAM3C/QSOX1/PROS1/TIMP3/ENDOD1/CD36/RAB27B/ISLR/LGALS3BP/GAS6/ECM1/A2M/A1BG/FLNA	29
GO:0023061	signal release	60/1346	433/17913	2.88930856639289e-06	0.00386878417040009	0.00364965292596997	STXBP4/CYB5R4/NAAA/CSPG5/ASIC1/TNFSF11/P2RX1/REN/VAMP2/UNC13A/IL1B/RIMS3/CPE/SYP/SYT11/FOXL2/PFKL/RAB11FIP1/BACE1/TM7SF3/TBX3/RAB8B/LIF/PTPRN/SELENOM/C1QTNF3/SV2A/ADRA2C/FGFR1/SYT7/RBP4/ICA1/GRIN3A/VAMP1/GAD1/PRRT2/GIP/SLC25A6/ITPR2/ITPR1/ABCC8/SIDT2/SCG5/APBA1/LIN7B/C1QTNF1/PRKCB/STXBP5L/RIMS1/MAP4K4/ENHO/BLOC1S6/VGF/CPLX1/OSM/FOXD1/CHAT/EPHA5/RPH3A/KALRN	60
GO:0001706	endoderm formation	14/1346	50/17913	1.22496057872433e-05	0.0130108224188514	0.0122738783087313	COL5A1/FN1/SOX7/COL8A1/MMP15/COL6A1/HMGA2/ITGB2/MESP1/LAMA3/MMP2/COL5A2/ITGA5/ITGA4	14
GO:0009100	glycoprotein metabolic process	51/1346	369/17913	1.69252053601521e-05	0.0130108224188514	0.0122738783087313	TMTC1/DCN/GALNT6/CSPG5/GALNT1/ADAMTS13/EDEM1/SULF2/GBGT1/CSPG4/COG7/ST6GALNAC1/GALNT13/RAMP1/B3GAT2/NEU4/EDEM3/ST6GALNAC2/DPM3/SPOCK2/SPOCK3/PXYLP1/DSEL/B4GAT1/IGF1/FBXO2/C1GALT1C1/ABCA7/DERL3/HS3ST3B1/CHPF/HYAL1/BACE2/SRD5A3/LFNG/CHSY3/IDUA/JAK3/MANBA/MAN1A1/MUC16/GALNT12/TET1/NCSTN/SLC51B/TRAK2/POFUT1/FKTN/B3GALT4/MGAT5B/TMTC4	51
GO:0035987	endodermal cell differentiation	13/1346	45/17913	1.72345775235756e-05	0.0130108224188514	0.0122738783087313	COL5A1/FN1/COL8A1/MMP15/COL6A1/HMGA2/ITGB2/MESP1/LAMA3/MMP2/COL5A2/ITGA5/ITGA4	13
GO:0001655	urogenital system development	46/1346	324/17913	2.18628457374276e-05	0.0130108224188514	0.0122738783087313	UBE3A/DCN/WNT7B/NPHS2/NID1/TNC/HYAL2/ADAMTS16/COL4A3/SULF2/SRD5A1/PDGFRB/REN/PDGFA/CRLF1/PCSK9/GDF11/MTSS1/ROBO2/FOXB1/WNT11/BCL2L11/CD24/PLCE1/CTSH/HAS2/CAT/ITGB4/LIF/PKD2/FGFR1/STRA6/IL6R/RBP4/CFLAR/NPNT/BMPER/SMO/ACTA2/TNS2/ALOX15B/ANGPT1/FOXD1/NOTCH3/PTPRO/EPHA4	46
GO:0006836	neurotransmitter transport	37/1346	241/17913	2.48990492107948e-05	0.0133359307573017	0.0125805722328226	NAAA/ADA/CSPG5/ASIC1/TNFSF11/P2RX1/VAMP2/SLC22A1/SLC6A7/UNC13A/RIMS3/SYP/SYT11/SLC6A15/BACE1/GABRQ/AQP1/SV2A/SYT7/ICA1/GRIN3A/VAMP1/GAD1/PRRT2/APBA1/LIN7B/PRKCB/STXBP5L/RIMS1/MAOB/BLOC1S6/CPLX1/CHAT/RPH3A/SLC1A1/SLC1A2/SLC22A3	37
GO:0006631	fatty acid metabolic process	47/1346	339/17913	3.30262757317242e-05	0.0160807938926468	0.0151699639724666	NAAA/TWIST1/GGT1/EPHX2/EHHADH/DGAT2/MLXIPL/PPARA/PTGS1/ALDH5A1/FADS2/PTGDS/CYGB/PDK3/ACOT11/IL1B/CPT1B/CRYL1/ELOVL5/PPARGC1A/ELOVL2/CPT1C/AMACR/CBR4/SCD5/CYP7A1/CYP4A11/CYP4F12/UCP3/HACD4/AIG1/AKT2/ALOX5AP/GIP/APOC1/PLA2G3/ALOX15B/ACOXL/ERLIN2/CD36/SLC27A3/CROT/CES1/THEM5/ZADH2/ACSBG2/ACSL5	47
GO:0031589	cell-substrate adhesion	45/1346	322/17913	3.961033012612e-05	0.0171767769068316	0.0162038695713202	TBCD/CSPG5/NID1/FBLN1/FN1/DMTN/ADAMTS13/COL3A1/MICALL2/VWF/L1CAM/EMP2/PLAU/DISC1/SNED1/COL8A1/TMEM8B/SPOCK2/GBP1/BCL2L11/CCDC80/TRIOBP/HAS2/EMILIN1/FBLN5/CORO1A/ITGB2/ITGB4/PTPRJ/PTN/TTYH1/LIMS1/NPNT/ITGA11/ITGA2/ITGA5/MYO1G/ANGPT1/MAP4K4/ITGA4/CD36/ADAM15/GAS6/PTPRO/FLNA	45
GO:0030203	glycosaminoglycan metabolic process	27/1346	157/17913	4.16912060845426e-05	0.0171767769068316	0.0162038695713202	DCN/CSPG5/HYAL2/SDC3/GALNS/CSPG4/PDGFRB/CLN6/ST3GAL6/B3GAT2/FUCA1/IL1B/SPOCK2/SPOCK3/PXYLP1/DSEL/B4GAT1/HS3ST3B1/HSPG2/CHPF/HYAL1/HAS2/CHSY3/IDUA/ANGPT1/GPC5/HGSNAT	27
GO:0044282	small molecule catabolic process	53/1346	404/17913	4.95682991869626e-05	0.0189634150318123	0.0178893109847684	SORD/QPRT/OGDH/ALDH3B1/ADA/AMT/TWIST1/NT5E/EHHADH/HYAL2/HPD/PPARA/ALDH5A1/GALK1/CRYM/CPT1B/TIGAR/PGM2L1/CSAD/CRYL1/PFKL/PRODH/CPT1C/AMACR/ATP2B4/GPT/HYAL1/SRD5A3/ALDH1L2/IDUA/CBR3/PKLR/CYP24A1/ENTPD2/CYP7A1/CYP4A11/GLS/CYP4F12/CYP39A1/ENTPD4/AIG1/GAD1/AKT2/ADHFE1/ACOXL/ALDOC/XYLB/ALDH7A1/CROT/TST/ENTPD8/APOBEC3C/AMDHD1	53
GO:0032963	collagen metabolic process	20/1346	102/17913	6.17731440776793e-05	0.0206097622364375	0.0194424076755827	COL5A1/PDGFRB/SERPINF2/CYGB/P3H4/COL15A1/MMP15/MMP7/CTSB/TNXB/EMILIN1/RGCC/P3H1/MMP11/RCN3/MMP2/ITGA2/TNS2/ADAM15/FAP	20
GO:0048667	cell morphogenesis involved in neuron differentiation	62/1346	500/17913	6.46769717164487e-05	0.0206097622364375	0.0194424076755827	UBE3A/NUMBL/TBCD/MAPK8IP2/FARP1/FN1/MEGF8/NEFH/DCLK1/SZT2/L1CAM/ZNF365/IL1RAPL1/COL25A1/DOK4/DISC1/AMIGO1/PDLIM5/TSKU/SCN1B/CRABP2/NTNG1/ROBO2/FOXB1/SEMA3B/TCTN1/TRIOBP/ARHGAP33/ADGRB1/ANOS1/PTPRM/PTN/LHX9/CSF1R/SEMA3G/CCK/NGEF/MATN2/ETV1/ATL1/ARHGAP4/SHOX2/FSTL4/NIN/OBSL1/SARM1/DPYSL5/TRAK2/BTBD3/ITGA4/TMEM106B/SEMA6C/SPTBN4/CHRNA7/FOXD1/DNM3/PTPRO/EPHA5/EPHA4/SEMA3F/SHANK3/KALRN	62
GO:0001505	regulation of neurotransmitter levels	44/1346	321/17913	7.62706141203458e-05	0.0215002846962406	0.0202824901815878	NAAA/CSPG5/ASIC1/AMT/CLN3/P2RX1/SRD5A1/VAMP2/ALDH5A1/UNC13A/IL1B/GLYAT/RIMS3/SYP/SYT11/CLU/SARDH/ATP2B4/BACE1/ITGB2/SV2A/PKD2/SYT7/GRIN3A/VAMP1/ACP5/GAD1/PRRT2/APBA1/LIN7B/PRKCB/STXBP5L/RIMS1/ALDH7A1/CHDH/CD36/MAOB/BLOC1S6/CPLX1/CHAT/RPH3A/SLC1A1/SLC1A2/SLC22A3	44
GO:0016054	organic acid catabolic process	36/1346	250/17913	0.000123338602414907	0.02872180671888	0.0270949790202084	SORD/QPRT/OGDH/AMT/TWIST1/EHHADH/HYAL2/HPD/PPARA/ALDH5A1/CRYM/CPT1B/CSAD/CRYL1/PRODH/CPT1C/AMACR/ATP2B4/GPT/HYAL1/ALDH1L2/IDUA/CYP4A11/GLS/CYP4F12/CYP39A1/AIG1/GAD1/AKT2/ADHFE1/ACOXL/XYLB/ALDH7A1/CROT/TST/AMDHD1	36
GO:0046395	carboxylic acid catabolic process	36/1346	250/17913	0.000123338602414907	0.02872180671888	0.0270949790202084	SORD/QPRT/OGDH/AMT/TWIST1/EHHADH/HYAL2/HPD/PPARA/ALDH5A1/CRYM/CPT1B/CSAD/CRYL1/PRODH/CPT1C/AMACR/ATP2B4/GPT/HYAL1/ALDH1L2/IDUA/CYP4A11/GLS/CYP4F12/CYP39A1/AIG1/GAD1/AKT2/ADHFE1/ACOXL/XYLB/ALDH7A1/CROT/TST/AMDHD1	36
GO:0099643	signal release from synapse	25/1346	150/17913	0.000132907825410187	0.0288723955027304	0.027237038326541	NAAA/CSPG5/ASIC1/P2RX1/VAMP2/UNC13A/RIMS3/SYP/SYT11/BACE1/SV2A/SYT7/GRIN3A/VAMP1/GAD1/PRRT2/APBA1/LIN7B/PRKCB/STXBP5L/RIMS1/BLOC1S6/CPLX1/CHAT/RPH3A	25
GO:0050654	chondroitin sulfate proteoglycan metabolic process	11/1346	42/17913	0.000201382847415791	0.0399483900281103	0.0376856790485691	DCN/CSPG5/CSPG4/SPOCK2/SPOCK3/PXYLP1/DSEL/CHPF/HYAL1/CHSY3/IDUA	11

## Sheet: Table S6_KEGG_UP_DGEs
ID	Description	GeneRatio	BgRatio	pvalue	p.adjust	qvalue	geneID	Count	KEGG orthology
hsa04512	ECM-receptor interaction	23/606	88/8073	7.51628082234667E-08	0.0000231501449328277	0.0000200170426110916	2335/3371/1285/7450/1288/3910/2815/1299/1291/7148/10319/3339/3691/9900/3909/255743/22801/3673/3678/3676/948/2812/284217	23	Signaling molecules and interaction
hsa04610	Complement and coagulation cascades	17/606	85/8073	0.000156380910804558	0.0240826602639019	0.0208233528597648	1675/710/7450/5327/5345/5328/2157/1191/733/629/715/3689/5627/623/719/7056/2	17	Immune system
hsa05165	Human papillomavirus infection	41/606	331/8073	0.00092321602939118	0.0460055679014902	0.0397792504411381	54626/7337/3551/1026/534/84552/7477/148327/9134/2335/3371/1285/6932/7249/7450/5159/1288/3910/10297/1299/11211/1291/7148/10319/7481/8313/50855/3955/3691/55502/3909/5934/22801/208/3673/3678/3107/3676/245973/4854/284217	41	Infectious disease: viral
hsa04020	Calcium signaling pathway	28/606	201/8073	0.0010167442547105	0.0460055679014902	0.0397792504411381	3707/5137/7125/219931/5023/8913/5159/5154/163688/5731/489/5733/444/93129/51196/493/2925/84812/84876/623/5330/293/3709/3708/5579/53373/10800/1139	28	Signal transduction
hsa04510	Focal adhesion	28/606	201/8073	0.0010167442547105	0.0460055679014902	0.0397792504411381	2335/3371/1285/25759/7450/5159/5154/1288/3910/2318/4636/2324/1299/1291/3479/7148/10319/3691/3909/5599/22801/208/3673/3678/5579/3676/284217/2316	28	Cellular community - eukaryotes
hsa04142	Lysosome	21/606	128/8073	0.000509660993518144	0.0460055679014902	0.0397792504411381	23457/84572/1201/8692/3920/2588/26503/2517/1508/1519/3373/130340/1512/4668/3425/5476/4126/9583/54/8722/138050	21	Transport and catabolism
hsa04940	Type I diabetes mellitus	10/606	43/8073	0.00104558108867023	0.0460055679014902	0.0397792504411381	3109/3108/940/3553/1363/3125/5798/3382/2571/3107	10	Endocrine and metabolic disease
